# Supplementary material for: Proteome Profiling of Canine Epididymal Fluid: In Search of Protein Markers of Epididymal Sperm Motility
Source: MDPI journal article supplement (doi:10.3390/ijms241914790), 2023-09-30
Supplement: s1 [file s1]

**Supplementary Table S2.** Proteins of the cauda epididymal fluid of dogs (*Canis lupus familiaris*) with poor sperm motility (PSM) evaluated by nanoUPLC-Q-TOF/MS.

| Description                                                                                                                | Log<br>Prob | Best<br> Log<br>Prob | Best<br>score | Total<br>Intensity | # of<br>spectra | # of<br>unique<br>peptides | # of<br>mod<br>peptides | Coverage<br>% | # AA's<br>in<br>protein | Protein<br>DB<br>number |
|----------------------------------------------------------------------------------------------------------------------------|-------------|----------------------|---------------|--------------------|-----------------|----------------------------|-------------------------|---------------|-------------------------|-------------------------|
| >tr F1PR54 F1PR54_CANLF Lactotransferrin OS=Canis lupus familiaris<br>OX=9615 GN=LTF PE=3 SV=1                             | 82,78       | 6,65                 | 624,50        | 2903895301,9       | 136             | 24                         | 2                       | 33,90         | 708                     | 40436                   |
| >sp O18840 ACTB_CANLF Actin, cytoplasmic 1 OS=Canis lupus familiaris<br>OX=9615 GN=ACTB PE=2 SV=3                          | 23,21       | 4,76                 | 463,00        | 1260422780,2       | 47              | 7                          | 0                       | 14,93         | 375                     | 642                     |
| >tr F1PJ71 F1PJ71_CANLF Glutathione peroxidase OS=Canis lupus familiaris<br>OX=9615 GN=GPX5 PE=3 SV=2                      | 26,18       | 7,08                 | 645,30        | 857174949,9        | 80              | 7                          | 1                       | 45,25         | 221                     | 19009                   |
| >sp P25473 CLUS_CANLF Clusterin OS=Canis lupus familiaris<br>OX=9615 GN=CLU PE=2 SV=1                                      | 14,78       | 4,60                 | 459,20        | 482472376,1        | 22              | 9                          | 2                       | 18,20         | 445                     | 725                     |
| >tr F1PR54 F1PR54_CANLF Lactotransferrin OS=Canis lupus familiaris<br>OX=9615 GN=LTF PE=3 SV=1                             | 70,57       | 8,44                 | 673,60        | 345105913,0        | 86              | 17                         | 3                       | 32,06         | 708                     | 40436                   |
| >sp O46607 GPX5_CANLF Epididymal secretory glutathione peroxidase<br>OS=Canis lupus familiaris OX=9615 GN=GPX5 PE=2 SV=1   | 9,01        | 4,38                 | 489,60        | 330057705,9        | 17              | 4                          | 0                       | 18,10         | 221                     | 564                     |
| >sp Q9XS65 PTGDS_CANLF Prostaglandin-H2 D-isomerase OS=Canis lupus familiaris<br>OX=9615 GN=PTGDS PE=2 SV=1                | 12,26       | 8,60                 | 658,80        | 303880413,7        | 25              | 3                          | 2                       | 23,56         | 191                     | 165                     |
| >sp Q28895 NPC2_CANLF NPC intracellular cholesterol transporter 2<br>OS=Canis lupus familiaris OX=9615 GN=NPC2 PE=2 SV=1   | 14,28       | 8,96                 | 712,30        | 293600777,7        | 12              | 2                          | 0                       | 24,16         | 149                     | 153                     |
| >sp P49822 ALBU_CANLF Albumin OS=Canis lupus familiaris<br>OX=9615 GN=ALB PE=1 SV=3                                        | 10,36       | 4,83                 | 539,70        | 289532592,1        | 13              | 4                          | 0                       | 10,36         | 608                     | 490                     |
| >tr F1PR54 F1PR54_CANLF Lactotransferrin OS=Canis lupus familiaris<br>OX=9615 GN=LTF PE=3 SV=1                             | 75,34       | 5,92                 | 641,40        | 274242371,5        | 83              | 22                         | 6                       | 38,70         | 708                     | 40436                   |
| >tr A0A5F4CCD0 A0A5F4CCD0_CANLF Cysteine rich secretory protein 2<br>OS=Canis lupus familiaris OX=9615 GN=CRISP2 PE=3 SV=1 | 8,63        | 4,27                 | 449,30        | 247778382,8        | 9               | 2                          | 0                       | 10,29         | 311                     | 11017                   |
| >tr F1PR54 F1PR54_CANLF Lactotransferrin OS=Canis lupus familiaris<br>OX=9615 GN=LTF PE=3 SV=1                             | 51,42       | 8,08                 | 669,60        | 229432832,4        | 76              | 12                         | 1                       | 22,03         | 708                     | 40436                   |
| >sp Q6AW47 EST5A_CANLF Carboxylesterase 5A OS=Canis lupus familiaris<br>OX=9615 GN=CES5A PE=2 SV=1                         | 6,06        | 4,36                 | 469,60        | 209362731,1        | 17              | 2                          | 0                       | 5,74          | 575                     | 629                     |
| >sp Q9XS65 PTGDS_CANLF Prostaglandin-H2 D-isomerase OS=Canis lupus familiaris<br>OX=9615 GN=PTGDS PE=2 SV=1                | 8,23        | 5,30                 | 539,50        | 208206170,1        | 13              | 3                          | 1                       | 39,79         | 191                     | 165                     |
| >sp Q659K0 CCNB3_CANLF G2/mitotic-specific cyclin-B3 OS=Canis lupus familiaris<br>OX=9615 GN=CCNB3 PE=2 SV=1               | 1,69        | 1,41                 | 115,90        | 194692521,2        | 15              | 1                          | 0                       | 0,38          | 1330                    | 483                     |
| >sp P49822 ALBU_CANLF Albumin OS=Canis lupus familiaris<br>OX=9615 GN=ALB PE=1 SV=3                                        | 22,15       | 5,88                 | 563,90        | 180272050,6        | 28              | 7                          | 2                       | 14,47         | 608                     | 490                     |
| >tr J9NWX1 J9NWX1_CANLF Quinoid dihydropteridine reductase<br>OS=Canis lupus familiaris OX=9615 GN=QDPR PE=3 SV=2          | 3,15        | 3,03                 | 374,50        | 176250556,5        | 7               | 1                          | 0                       | 6,42          | 296                     | 22710                   |
| >tr A0A5F4DA00 A0A5F4DA00_CANLF G2/mitotic-specific cyclin-B3<br>OS=Canis lupus familiaris OX=9615 GN=CCNB3 PE=3 SV=1      | 1,35        | 0,99                 | 93,80         | 175048340,4        | 19              | 2                          | 0                       | 0,52          | 1352                    | 45045                   |
| >sp Q28895 NPC2_CANLF NPC intracellular cholesterol transporter 2<br>OS=Canis lupus familiaris OX=9615 GN=NPC2 PE=2 SV=1   | 10,99       | 10,71                | 776,40        | 163008295,7        | 15              | 1                          | 0                       | 15,44         | 149                     | 153                     |
| >sp Q9GL25 ESPB1_CANLF Epididymal sperm-binding protein 1                                                                  | 2,96        | 1,63                 | 351,00        | 157043247,6        | 12              | 2                          | 1                       | 3,27          | 245                     | 36                      |

OS=Canis lupus familiaris OX=9615 GN=ELSPBP1 PE=1 SV=1

|                                                                                                                                         |       |       |        |             |    |    |   |       |      |       |
|-----------------------------------------------------------------------------------------------------------------------------------------|-------|-------|--------|-------------|----|----|---|-------|------|-------|
| >tr F1PB68 F1PB68_CANLF Olfactomedin 4 OS=Canis lupus familiaris<br>OX=9615 GN=OLFM4 PE=4 SV=3                                          | 11,20 | 4,06  | 342,50 | 145528720,0 | 9  | 3  | 0 | 10,69 | 477  | 17246 |
| >sp Q659K0 CCNB3_CANLF G2/mitotic-specific cyclin-B3 OS=Canis lupus familiaris<br>OX=9615 GN=CCNB3 PE=2 SV=1                            | 0,38  | 0,14  | 125,40 | 141875792,7 | 13 | 1  | 0 | 0,38  | 1330 | 483   |
| >tr J9NVE0 J9NVE0_CANLF KRAB domain-containing protein<br>OS=Canis lupus familiaris OX=9615 GN=LOC606925 PE=4 SV=1                      | 0,19  | 0,04  | 125,00 | 139278712,7 | 9  | 1  | 0 | 4,08  | 147  | 3752  |
| >tr F1PR54 F1PR54_CANLF Lactotransferrin OS=Canis lupus familiaris<br>OX=9615 GN=LTF PE=3 SV=1                                          | 25,42 | 7,24  | 659,50 | 132982807,8 | 25 | 8  | 0 | 15,96 | 708  | 40436 |
| >tr A0A5F4BVX3 A0A5F4BVX3_CANLF ATP-dependent RNA helicase DHX29<br>OS=Canis lupus familiaris OX=9615 GN=DHX29 PE=3 SV=1                | 0,11  | 0,03  | 217,40 | 122017438,6 | 5  | 1  | 0 | 0,71  | 1261 | 11633 |
| >sp P25473 CLUS_CANLF Clusterin OS=Canis lupus familiaris<br>OX=9615 GN=CLU PE=2 SV=1                                                   | 26,61 | 6,39  | 634,70 | 119971934,8 | 37 | 7  | 1 | 22,47 | 445  | 725   |
| >tr F2Z4Q6 F2Z4Q6_CANLF Alpha fetoprotein OS=Canis lupus familiaris<br>OX=9615 GN=AFP PE=4 SV=2                                         | 35,14 | 7,54  | 664,10 | 107309933,1 | 32 | 10 | 1 | 27,63 | 637  | 24990 |
| >tr A0A5F4C1S8 A0A5F4C1S8_CANLF E3 ubiquitin-protein ligase CBL<br>OS=Canis lupus familiaris OX=9615 GN=CBL PE=4 SV=1                   | 0,18  | 0,08  | 195,00 | 106460722,8 | 6  | 1  | 0 | 0,52  | 773  | 1308  |
| >tr F1PR54 F1PR54_CANLF Lactotransferrin OS=Canis lupus familiaris<br>OX=9615 GN=LTF PE=3 SV=1                                          | 51,90 | 8,52  | 688,90 | 101463395,7 | 67 | 14 | 1 | 25,99 | 708  | 40436 |
| >tr A0A5F4C6B5 A0A5F4C6B5_CANLF Plastin 3 OS=Canis lupus familiaris<br>OX=9615 GN=PLS3 PE=4 SV=1                                        | 8,53  | 4,00  | 477,70 | 96569661,8  | 10 | 5  | 0 | 14,71 | 639  | 30730 |
| >sp Q659K0 CCNB3_CANLF G2/mitotic-specific cyclin-B3 OS=Canis lupus familiaris<br>OX=9615 GN=CCNB3 PE=2 SV=1                            | 0,78  | 0,44  | 120,30 | 94654876,1  | 18 | 1  | 0 | 0,38  | 1330 | 483   |
| >sp O18840 ACTB_CANLF Actin, cytoplasmic 1 OS=Canis lupus familiaris<br>OX=9615 GN=ACTB PE=2 SV=3                                       | 6,63  | 3,26  | 432,80 | 90839807,5  | 18 | 3  | 0 | 7,20  | 375  | 642   |
| >tr E2RCT1 E2RCT1_CANLF WAP domain-containing protein<br>OS=Canis lupus familiaris OX=9615 PE=4 SV=2                                    | 4,14  | 4,06  | 366,30 | 89215392,1  | 5  | 1  | 0 | 13,79 | 116  | 21717 |
| >sp P49822 ALBU_CANLF Albumin OS=Canis lupus familiaris<br>OX=9615 GN=ALB PE=1 SV=3                                                     | 18,41 | 7,01  | 640,40 | 88369343,1  | 19 | 5  | 0 | 13,32 | 608  | 490   |
| >tr F2Z4Q6 F2Z4Q6_CANLF Alpha fetoprotein OS=Canis lupus familiaris<br>OX=9615 GN=AFP PE=4 SV=2                                         | 42,27 | 10,55 | 744,10 | 86879158,2  | 40 | 7  | 0 | 17,90 | 637  | 24990 |
| >tr F1PR54 F1PR54_CANLF Lactotransferrin OS=Canis lupus familiaris<br>OX=9615 GN=LTF PE=3 SV=1                                          | 40,79 | 8,28  | 673,20 | 84848416,5  | 54 | 12 | 1 | 18,93 | 708  | 40436 |
| >sp Q6AW47 EST5A_CANLF Carboxylesterase 5A OS=Canis lupus familiaris<br>OX=9615 GN=CES5A PE=2 SV=1                                      | 19,22 | 11,59 | 761,30 | 78741726,5  | 20 | 5  | 0 | 18,09 | 575  | 629   |
| >sp Q6AW47 EST5A_CANLF Carboxylesterase 5A OS=Canis lupus familiaris<br>OX=9615 GN=CES5A PE=2 SV=1                                      | 11,73 | 5,45  | 568,00 | 75449919,4  | 17 | 3  | 0 | 9,74  | 575  | 629   |
| >tr E2QZK8 E2QZK8_CANLF Potassium channel tetramerization domain containing 13<br>OS=Canis lupus familiaris OX=9615 GN=KCTD13 PE=4 SV=1 | 0,36  | 0,08  | 77,80  | 74321631,3  | 15 | 1  | 0 | 1,52  | 329  | 2883  |
| >tr F1PR54 F1PR54_CANLF Lactotransferrin OS=Canis lupus familiaris<br>OX=9615 GN=LTF PE=3 SV=1                                          | 42,10 | 5,92  | 628,10 | 71831632,5  | 51 | 16 | 2 | 28,53 | 708  | 40436 |
| >tr F1PJ71 F1PJ71_CANLF Glutathione peroxidase OS=Canis lupus familiaris<br>OX=9615 GN=GPX5 PE=3 SV=2                                   | 9,70  | 3,55  | 419,20 | 64942776,3  | 10 | 3  | 0 | 16,74 | 221  | 19009 |
| >tr F1PJ71 F1PJ71_CANLF Glutathione peroxidase OS=Canis lupus familiaris<br>OX=9615 GN=GPX5 PE=3 SV=2                                   | 12,57 | 5,34  | 557,60 | 60196690,9  | 17 | 4  | 0 | 23,53 | 221  | 19009 |

|                                                                                                                                         |       |       |        |            |    |    |   |       |      |       |
|-----------------------------------------------------------------------------------------------------------------------------------------|-------|-------|--------|------------|----|----|---|-------|------|-------|
| >sp Q28895 NPC2_CANLF NPC intracellular cholesterol transporter 2<br>OS=Canis lupus familiaris OX=9615 GN=NPC2 PE=2 SV=1                | 15,24 | 9,78  | 742,20 | 60071338,4 | 18 | 3  | 0 | 30,87 | 149  | 153   |
| >tr F1PLT8 F1PLT8_CANLF Sulphydryl oxidase OS=Canis lupus familiaris<br>OX=9615 GN=QSOX1 PE=3 SV=3                                      | 3,42  | 3,32  | 251,40 | 59419835,3 | 5  | 2  | 0 | 5,46  | 568  | 33056 |
| >tr F1PR54 F1PR54_CANLF Lactotransferrin OS=Canis lupus familiaris<br>OX=9615 GN=LTF PE=3 SV=1                                          | 40,69 | 8,49  | 660,60 | 55984690,4 | 58 | 13 | 1 | 22,46 | 708  | 40436 |
| >tr J9NVE0 J9NVE0_CANLF KRAB domain-containing protein<br>OS=Canis lupus familiaris OX=9615 GN=LOC606925 PE=4 SV=1                      | 0,20  | 0,10  | 122,60 | 55238541,0 | 6  | 1  | 0 | 4,08  | 147  | 3752  |
| >tr A0A5F4D454 A0A5F4D454_CANLF Phosphoinositide-3-kinase regulatory subunit 4<br>OS=Canis lupus familiaris OX=9615 GN=PIK3R4 PE=4 SV=1 | 0,44  | 0,42  | 184,50 | 54900368,0 | 2  | 1  | 0 | 0,99  | 1313 | 3150  |
| >sp O18840 ACTB_CANLF Actin, cytoplasmic 1 OS=Canis lupus familiaris<br>OX=9615 GN=ACTB PE=2 SV=3                                       | 8,21  | 4,14  | 431,00 | 53549872,4 | 15 | 4  | 0 | 14,13 | 375  | 642   |
| >tr F1PR54 F1PR54_CANLF Lactotransferrin OS=Canis lupus familiaris<br>OX=9615 GN=LTF PE=3 SV=1                                          | 50,07 | 3,63  | 548,60 | 52934880,3 | 75 | 20 | 1 | 33,62 | 708  | 40436 |
| >tr A0A5F4DEZ2 A0A5F4DEZ2_CANLF DAB2 interacting protein<br>OS=Canis lupus familiaris OX=9615 GN=DAB2IP PE=4 SV=1                       | 0,10  | 0,06  | 203,30 | 51761766,5 | 2  | 1  | 0 | 0,79  | 1272 | 12373 |
| >tr F1PLV2 F1PLV2_CANLF Peptidyl-prolyl cis-trans isomerase<br>OS=Canis lupus familiaris OX=9615 GN=CSNK1G1 PE=3 SV=3                   | 3,57  | 3,53  | 293,00 | 51412001,1 | 3  | 1  | 0 | 5,35  | 243  | 4290  |
| >tr A0A5F4C9S3 A0A5F4C9S3_CANLF Boule homolog, RNA binding protein<br>OS=Canis lupus familiaris OX=9615 GN=BOLL PE=4 SV=1               | 0,22  | 0,04  | 174,10 | 50393536,9 | 10 | 1  | 0 | 1,92  | 365  | 16536 |
| >tr E2REQ4 E2REQ4_CANLF NIPA like domain containing 3<br>OS=Canis lupus familiaris OX=9615 GN=NIPAL3 PE=3 SV=3                          | 0,10  | 0,03  | 122,00 | 49581947,1 | 3  | 2  | 0 | 2,17  | 368  | 39451 |
| >tr F1PYU7 F1PYU7_CANLF Cyclin A1 OS=Canis lupus familiaris<br>OX=9615 GN=CCNA1 PE=3 SV=2                                               | 0,10  | 0,02  | 153,20 | 47824851,1 | 3  | 1  | 0 | 2,38  | 421  | 9029  |
| >sp Q6AW47 EST5A_CANLF Carboxylesterase 5A OS=Canis lupus familiaris<br>OX=9615 GN=CES5A PE=2 SV=1                                      | 4,34  | 4,16  | 439,70 | 47480101,6 | 10 | 1  | 0 | 3,13  | 575  | 629   |
| >sp Q28895 NPC2_CANLF NPC intracellular cholesterol transporter 2<br>OS=Canis lupus familiaris OX=9615 GN=NPC2 PE=2 SV=1                | 15,31 | 9,10  | 726,30 | 47099576,9 | 22 | 2  | 0 | 24,16 | 149  | 153   |
| >sp Q9GL25 ESPB1_CANLF Epididymal sperm-binding protein 1<br>OS=Canis lupus familiaris OX=9615 GN=ELSPBP1 PE=1 SV=1                     | 4,74  | 3,48  | 315,60 | 45398380,2 | 11 | 3  | 1 | 10,20 | 245  | 36    |
| >tr A0A5F4CKD5 A0A5F4CKD5_CANLF Polypeptide N-acetylglactosaminyltransferase<br>OS=Canis lupus familiaris OX=9615 GN=GALNT6 PE=3 SV=1   | 5,01  | 3,13  | 322,00 | 45307211,3 | 3  | 2  | 0 | 7,30  | 644  | 1617  |
| >sp O46607 GPX5_CANLF Epididymal secretory glutathione peroxidase<br>OS=Canis lupus familiaris OX=9615 GN=GPX5 PE=2 SV=1                | 16,83 | 9,04  | 740,40 | 45137405,8 | 21 | 5  | 1 | 33,94 | 221  | 564   |
| >tr J9NS29 J9NS29_CANLF Cystatin domain-containing protein<br>OS=Canis lupus familiaris OX=9615 GN=LOC607874 PE=4 SV=2                  | 4,13  | 4,07  | 348,80 | 44905501,6 | 4  | 1  | 0 | 4,79  | 313  | 30016 |
| >tr J9P748 J9P748_CANLF Bromodomain adjacent to zinc finger domain 1A<br>OS=Canis lupus familiaris OX=9615 GN=BAZ1A PE=4 SV=1           | 1,23  | 1,22  | 299,60 | 44798397,9 | 2  | 1  | 0 | 0,45  | 1557 | 10939 |
| >sp Q28895 NPC2_CANLF NPC intracellular cholesterol transporter 2<br>OS=Canis lupus familiaris OX=9615 GN=NPC2 PE=2 SV=1                | 10,69 | 10,47 | 787,80 | 41745352,9 | 12 | 1  | 0 | 15,44 | 149  | 153   |
| >sp P49822 ALBU_CANLF Albumin OS=Canis lupus familiaris<br>OX=9615 GN=ALB PE=1 SV=3                                                     | 3,83  | 1,86  | 362,70 | 39324167,1 | 8  | 4  | 2 | 7,24  | 608  | 490   |
| >sp Q9GL25 ESPB1_CANLF Epididymal sperm-binding protein 1<br>OS=Canis lupus familiaris OX=9615 GN=ELSPBP1 PE=1 SV=1                     | 5,69  | 4,25  | 285,60 | 37587280,5 | 10 | 3  | 1 | 10,20 | 245  | 36    |

|                                                                                                                                              |       |      |        |            |    |   |   |       |      |       |
|----------------------------------------------------------------------------------------------------------------------------------------------|-------|------|--------|------------|----|---|---|-------|------|-------|
| >tr J9P432 J9P432_CANLF Glutamine--fructose-6-phosphate transaminase (isomerizing)<br>OS=Canis lupus familiaris OX=9615 GN=GFPT1 PE=4 SV=2   | 0,14  | 0,10 | 149,50 | 35083407,2 | 3  | 1 | 0 | 1,18  | 677  | 7191  |
| >tr A0A5F4DGF5 A0A5F4DGF5_CANLF Alkaline phosphatase<br>OS=Canis lupus familiaris OX=9615 GN=ALPL PE=3 SV=1                                  | 2,45  | 2,41 | 249,70 | 34518166,7 | 3  | 1 | 0 | 1,92  | 572  | 6357  |
| >tr J9P1P6 J9P1P6_CANLF Coiled-coil domain-containing protein 25<br>OS=Canis lupus familiaris OX=9615 PE=3 SV=2                              | 1,03  | 0,81 | 99,30  | 33600395,0 | 12 | 1 | 0 | 1,71  | 292  | 12368 |
| >sp Q28895 NPC2_CANLF NPC intracellular cholesterol transporter 2<br>OS=Canis lupus familiaris OX=9615 GN=NPC2 PE=2 SV=1                     | 8,20  | 8,06 | 687,00 | 33063508,8 | 8  | 1 | 0 | 15,44 | 149  | 153   |
| >tr J9NWX1 J9NWX1_CANLF Quinoid dihydropteridine reductase<br>OS=Canis lupus familiaris OX=9615 GN=QDPR PE=3 SV=2                            | 3,16  | 3,04 | 311,70 | 32809086,6 | 7  | 1 | 0 | 6,42  | 296  | 22710 |
| >tr J9NVE0 J9NVE0_CANLF KRAB domain-containing protein<br>OS=Canis lupus familiaris OX=9615 GN=LOC606925 PE=4 SV=1                           | 0,12  | 0,04 | 112,60 | 32654726,5 | 6  | 1 | 0 | 4,08  | 147  | 3752  |
| >sp Q9XS65 PTGDS_CANLF Prostaglandin-H2 D-isomerase OS=Canis lupus familiaris<br>OX=9615 GN=PTGDS PE=2 SV=1                                  | 5,51  | 4,00 | 428,50 | 32515314,1 | 9  | 2 | 0 | 32,46 | 191  | 165   |
| >sp Q9XS65 PTGDS_CANLF Prostaglandin-H2 D-isomerase OS=Canis lupus familiaris<br>OX=9615 GN=PTGDS PE=2 SV=1                                  | 7,67  | 5,93 | 568,10 | 32510605,5 | 14 | 3 | 1 | 32,46 | 191  | 165   |
| >tr E2RNH2 E2RNH2_CANLF Ras protein specific guanine nucleotide releasing factor 1<br>OS=Canis lupus familiaris OX=9615 GN=RASGRF1 PE=4 SV=2 | 0,11  | 0,03 | 102,20 | 31642930,1 | 5  | 1 | 0 | 0,39  | 1287 | 9564  |
| >sp P25473 CLUS_CANLF Clusterin OS=Canis lupus familiaris<br>OX=9615 GN=CLU PE=2 SV=1                                                        | 3,10  | 1,88 | 248,20 | 31230418,7 | 8  | 3 | 0 | 7,64  | 445  | 725   |
| >tr A0A5F4D4B6 A0A5F4D4B6_CANLF Immunoglobulin superfamily member 8<br>OS=Canis lupus familiaris OX=9615 GN=IGSF8 PE=4 SV=1                  | 0,23  | 0,19 | 139,00 | 30867342,4 | 3  | 1 | 0 | 1,99  | 905  | 16467 |
| >sp Q9XS65 PTGDS_CANLF Prostaglandin-H2 D-isomerase OS=Canis lupus familiaris<br>OX=9615 GN=PTGDS PE=2 SV=1                                  | 7,32  | 3,79 | 511,90 | 30149701,9 | 8  | 2 | 1 | 16,23 | 191  | 165   |
| >tr A0A5F4C9S3 A0A5F4C9S3_CANLF Boule homolog, RNA binding protein<br>OS=Canis lupus familiaris OX=9615 GN=BOLL PE=4 SV=1                    | 0,10  | 0,05 | 156,00 | 30149248,7 | 3  | 1 | 0 | 1,92  | 365  | 16536 |
| >tr E2REQ4 E2REQ4_CANLF NIPA like domain containing 3<br>OS=Canis lupus familiaris OX=9615 GN=NIPAL3 PE=3 SV=3                               | 0,11  | 0,03 | 137,80 | 30108504,1 | 5  | 2 | 0 | 2,17  | 368  | 39451 |
| >tr E2R838 E2R838_CANLF Intraflagellar transport 88 OS=Canis lupus familiaris<br>OX=9615 GN=IFT88 PE=4 SV=2                                  | 0,10  | 0,05 | 115,00 | 29961826,5 | 3  | 1 | 0 | 0,73  | 825  | 7901  |
| >tr A0A5F4D4B6 A0A5F4D4B6_CANLF Immunoglobulin superfamily member 8<br>OS=Canis lupus familiaris OX=9615 GN=IGSF8 PE=4 SV=1                  | 0,11  | 0,09 | 168,10 | 29468807,3 | 2  | 1 | 0 | 1,99  | 905  | 16467 |
| >tr A0A5F4C9S3 A0A5F4C9S3_CANLF Boule homolog, RNA binding protein<br>OS=Canis lupus familiaris OX=9615 GN=BOLL PE=4 SV=1                    | 0,11  | 0,02 | 184,70 | 29413623,8 | 9  | 1 | 0 | 1,92  | 365  | 16536 |
| >tr A0A5F4C4Q6 A0A5F4C4Q6_CANLF Arylsulfatase B OS=Canis lupus familiaris<br>OX=9615 GN=ARSB PE=3 SV=1                                       | 0,10  | 0,08 | 109,00 | 28541326,5 | 2  | 1 | 0 | 1,46  | 411  | 38230 |
| >tr J9P1P6 J9P1P6_CANLF Coiled-coil domain-containing protein 25<br>OS=Canis lupus familiaris OX=9615 PE=3 SV=2                              | 1,03  | 0,79 | 95,20  | 26899095,1 | 13 | 1 | 0 | 1,71  | 292  | 12368 |
| >tr F1PIZ1 F1PIZ1_CANLF Caspase recruitment domain family member 6<br>OS=Canis lupus familiaris OX=9615 GN=CARD6 PE=4 SV=3                   | 1,50  | 1,26 | 117,10 | 26635879,0 | 13 | 1 | 0 | 0,65  | 1071 | 14260 |
| >tr J9NVE0 J9NVE0_CANLF KRAB domain-containing protein<br>OS=Canis lupus familiaris OX=9615 GN=LOC606925 PE=4 SV=1                           | 0,11  | 0,05 | 124,50 | 26464712,7 | 4  | 1 | 0 | 4,08  | 147  | 3752  |
| >tr A0A5F4C3M5 A0A5F4C3M5_CANLF IQ motif containing GTPase activating<br>protein 2 OS=Canis lupus familiaris OX=9615 GN=IQGAP2 PE=4 SV=1     | 0,10  | 0,03 | 78,20  | 26309008,9 | 3  | 1 | 0 | 0,51  | 1577 | 1056  |
| >tr F2Z4Q6 F2Z4Q6_CANLF Alpha fetoprotein OS=Canis lupus familiaris                                                                          | 29,44 | 9,90 | 801,40 | 26270075,3 | 33 | 7 | 0 | 18,05 | 637  | 24990 |

OX=9615 GN=AFP PE=4 SV=2

|                                                                                                                                           |       |      |        |            |    |   |   |       |      |       |
|-------------------------------------------------------------------------------------------------------------------------------------------|-------|------|--------|------------|----|---|---|-------|------|-------|
| >sp P31637 SC5A3_CANLF Sodium/myo-inositol cotransporter<br>OS=Canis lupus familiaris OX=9615 GN=SLC5A3 PE=2 SV=1                         | 0,21  | 0,21 | 202,40 | 25526495,7 | 1  | 1 | 0 | 0,56  | 718  | 62    |
| >tr A0A5F4CCD0 A0A5F4CCD0_CANLF Cysteine rich secretory protein 2<br>OS=Canis lupus familiaris OX=9615 GN=CRISP2 PE=3 SV=1                | 7,15  | 2,96 | 352,60 | 24822205,8 | 6  | 3 | 1 | 15,76 | 311  | 11017 |
| >tr E2RCT1 E2RCT1_CANLF WAP domain-containing protein<br>OS=Canis lupus familiaris OX=9615 PE=4 SV=2                                      | 6,36  | 6,26 | 649,80 | 24493652,4 | 6  | 1 | 0 | 13,79 | 116  | 21717 |
| >tr E2RH40 E2RH40_CANLF Cilia and flagella associated protein 69<br>OS=Canis lupus familiaris OX=9615 GN=CFAP69 PE=4 SV=2                 | 0,42  | 0,37 | 56,00  | 24040685,6 | 4  | 1 | 0 | 0,53  | 941  | 3287  |
| >sp O18835 BGLR_CANLF Beta-glucuronidase OS=Canis lupus familiaris<br>OX=9615 GN=GUSB PE=2 SV=1                                           | 0,29  | 0,27 | 204,80 | 23964494,5 | 2  | 1 | 0 | 4,30  | 651  | 699   |
| >tr E2RIN3 E2RIN3_CANLF Otoancorin OS=Canis lupus familiaris<br>OX=9615 GN=OTOA PE=3 SV=3                                                 | 0,10  | 0,03 | 89,00  | 23858117,0 | 3  | 1 | 0 | 0,70  | 1139 | 18241 |
| >tr J9P1P6 J9P1P6_CANLF Coiled-coil domain-containing protein 25<br>OS=Canis lupus familiaris OX=9615 PE=3 SV=2                           | 1,14  | 0,98 | 101,60 | 23841076,9 | 9  | 1 | 0 | 1,71  | 292  | 12368 |
| >sp Q9XS65 PTGDS_CANLF Prostaglandin-H2 D-isomerase OS=Canis lupus familiaris<br>OX=9615 GN=PTGDS PE=2 SV=1                               | 3,89  | 3,39 | 343,50 | 23787909,2 | 4  | 2 | 1 | 16,23 | 191  | 165   |
| >tr F2Z4Q6 F2Z4Q6_CANLF Alpha fetoprotein OS=Canis lupus familiaris<br>OX=9615 GN=AFP PE=4 SV=2                                           | 21,03 | 3,89 | 501,70 | 23429036,8 | 16 | 6 | 0 | 16,17 | 637  | 24990 |
| >tr A0A5F4C6B5 A0A5F4C6B5_CANLF Plastin 3 OS=Canis lupus familiaris<br>OX=9615 GN=PLS3 PE=4 SV=1                                          | 6,46  | 2,75 | 339,50 | 23154831,8 | 7  | 3 | 0 | 8,14  | 639  | 30730 |
| >sp E2RK33 GATC_CANLF Glutamyl-tRNA(Gln) amidotransferase subunit C,<br>mitochondrial OS=Canis lupus familiaris OX=9615 GN=GATC PE=3 SV=1 | 1,16  | 1,16 | 166,80 | 22564281,2 | 1  | 1 | 0 | 2,58  | 155  | 39    |
| >sp Q9XS65 PTGDS_CANLF Prostaglandin-H2 D-isomerase OS=Canis lupus familiaris<br>OX=9615 GN=PTGDS PE=2 SV=1                               | 10,72 | 3,79 | 402,50 | 22378291,7 | 24 | 5 | 3 | 47,12 | 191  | 165   |
| >tr E2RSI6 E2RSI6_CANLF Ezrin OS=Canis lupus familiaris<br>OX=9615 GN=EZR PE=4 SV=1                                                       | 0,32  | 0,30 | 219,60 | 22156133,5 | 2  | 1 | 0 | 2,90  | 586  | 15650 |
| >tr A0A5F4C9S3 A0A5F4C9S3_CANLF Boule homolog, RNA binding protein<br>OS=Canis lupus familiaris OX=9615 GN=BOLL PE=4 SV=1                 | 0,16  | 0,06 | 158,60 | 21941903,4 | 6  | 1 | 0 | 1,92  | 365  | 16536 |
| >tr A0A5F4D8K0 A0A5F4D8K0_CANLF Phosphatidylinositol-4-phosphate 3-kinase<br>OS=Canis lupus familiaris OX=9615 GN=PIK3C2B PE=3 SV=1       | 0,12  | 0,12 | 108,80 | 21744786,9 | 1  | 1 | 1 | 1,00  | 1606 | 24952 |
| >sp Q28895 NPC2_CANLF NPC intracellular cholesterol transporter 2<br>OS=Canis lupus familiaris OX=9615 GN=NPC2 PE=2 SV=1                  | 13,11 | 7,67 | 682,40 | 20811083,0 | 8  | 2 | 0 | 24,16 | 149  | 153   |
| >tr F1Q1M8 F1Q1M8_CANLF Beta-N-acetylhexosaminidase OS=Canis lupus familiaris<br>OX=9615 GN=HEXB PE=3 SV=3                                | 2,10  | 2,06 | 316,90 | 20521807,8 | 3  | 1 | 0 | 6,36  | 330  | 5947  |
| >sp Q28895 NPC2_CANLF NPC intracellular cholesterol transporter 2<br>OS=Canis lupus familiaris OX=9615 GN=NPC2 PE=2 SV=1                  | 5,84  | 5,78 | 566,80 | 19916920,7 | 4  | 1 | 0 | 15,44 | 149  | 153   |
| >tr E2R0D9 E2R0D9_CANLF Solute carrier family 17 member 2<br>OS=Canis lupus familiaris OX=9615 GN=SLC17A2 PE=4 SV=1                       | 0,20  | 0,18 | 200,40 | 19844907,0 | 2  | 1 | 0 | 2,51  | 478  | 30466 |
| >tr F1P9H6 F1P9H6_CANLF Chloride intracellular channel protein<br>OS=Canis lupus familiaris OX=9615 GN=CLIC5 PE=3 SV=3                    | 1,68  | 1,68 | 249,10 | 19627818,2 | 1  | 1 | 0 | 2,78  | 252  | 14180 |
| >sp Q6AW47 EST5A_CANLF Carboxylesterase 5A OS=Canis lupus familiaris<br>OX=9615 GN=CES5A PE=2 SV=1                                        | 4,13  | 3,78 | 418,70 | 19021538,1 | 6  | 2 | 0 | 6,09  | 575  | 629   |
| >tr F1PLV2 F1PLV2_CANLF Peptidyl-prolyl cis-trans isomerase<br>OS=Canis lupus familiaris OX=9615 GN=CSNK1G1 PE=3 SV=3                     | 2,93  | 2,91 | 289,70 | 18955680,8 | 2  | 1 | 0 | 5,35  | 243  | 4290  |

|                                                                                                                                            |       |      |        |            |    |   |   |       |      |       |
|--------------------------------------------------------------------------------------------------------------------------------------------|-------|------|--------|------------|----|---|---|-------|------|-------|
| >tr F1PKE7 F1PKE7_CANLF C-type lectin domain containing 16A<br>OS=Canis lupus familiaris OX=9615 GN=CLEC16A PE=3 SV=3                      | 0,16  | 0,16 | 158,10 | 17816551,0 | 1  | 1 | 0 | 1,52  | 990  | 2034  |
| >sp Q9XS65 PTGDS_CANLF Prostaglandin-H2 D-isomerase OS=Canis lupus familiaris<br>OX=9615 GN=PTGDS PE=2 SV=1                                | 5,30  | 3,85 | 416,20 | 17285021,9 | 10 | 2 | 1 | 32,46 | 191  | 165   |
| >sp P49822 ALBU_CANLF Albumin OS=Canis lupus familiaris<br>OX=9615 GN=ALB PE=1 SV=3                                                        | 13,88 | 3,18 | 485,90 | 17165785,2 | 22 | 5 | 0 | 13,16 | 608  | 490   |
| >tr A0A5F4DGF5 A0A5F4DGF5_CANLF Alkaline phosphatase<br>OS=Canis lupus familiaris OX=9615 GN=ALPL PE=3 SV=1                                | 3,99  | 3,89 | 453,90 | 16779524,8 | 6  | 1 | 0 | 1,92  | 572  | 6357  |
| >tr A0A5F4DGF5 A0A5F4DGF5_CANLF Alkaline phosphatase<br>OS=Canis lupus familiaris OX=9615 GN=ALPL PE=3 SV=1                                | 1,17  | 1,13 | 239,00 | 16764800,4 | 3  | 1 | 0 | 1,92  | 572  | 6357  |
| >tr F1PSC2 F1PSC2_CANLF Talin 1 OS=Canis lupus familiaris<br>OX=9615 GN=TLN1 PE=4 SV=3                                                     | 0,54  | 0,54 | 139,90 | 16574271,5 | 1  | 1 | 0 | 0,63  | 2558 | 6161  |
| >tr A0A5F4CDM1 A0A5F4CDM1_CANLF L-lactate dehydrogenase<br>OS=Canis lupus familiaris OX=9615 PE=3 SV=1                                     | 0,10  | 0,07 | 113,30 | 16475929,5 | 2  | 1 | 0 | 2,87  | 279  | 43073 |
| >tr J9P3D0 J9P3D0_CANLF Solute carrier family 4 member 9<br>OS=Canis lupus familiaris OX=9615 GN=SLC4A9 PE=3 SV=2                          | 0,10  | 0,07 | 147,80 | 16474014,5 | 1  | 1 | 0 | 1,12  | 893  | 31921 |
| >tr J9P432 J9P432_CANLF Glutamine--fructose-6-phosphate transaminase (isomerizing)<br>OS=Canis lupus familiaris OX=9615 GN=GFPT1 PE=4 SV=2 | 0,37  | 0,29 | 182,50 | 15658742,1 | 5  | 1 | 0 | 1,18  | 677  | 7191  |
| >tr J9NVE0 J9NVE0_CANLF KRAB domain-containing protein<br>OS=Canis lupus familiaris OX=9615 GN=LOC606925 PE=4 SV=1                         | 0,54  | 0,48 | 105,70 | 15564671,2 | 4  | 1 | 0 | 4,08  | 147  | 3752  |
| >tr A0A5F4CQU2 A0A5F4CQU2_CANLF Ig-like domain-containing protein<br>OS=Canis lupus familiaris OX=9615 GN=DLA-DMB PE=3 SV=1                | 0,10  | 0,10 | 112,20 | 15539007,3 | 1  | 1 | 0 | 4,10  | 244  | 18966 |
| >tr A0A5F4CI02 A0A5F4CI02_CANLF Solute carrier family 35 member F4<br>OS=Canis lupus familiaris OX=9615 GN=SLC35F4 PE=3 SV=1               | 0,12  | 0,10 | 151,90 | 15322390,1 | 2  | 1 | 0 | 2,29  | 480  | 7991  |
| >tr J9NWX1 J9NWX1_CANLF Quinoid dihydropteridine reductase<br>OS=Canis lupus familiaris OX=9615 GN=QDPR PE=3 SV=2                          | 1,25  | 1,19 | 232,70 | 15292373,8 | 4  | 1 | 0 | 6,42  | 296  | 22710 |
| >tr E2QY78 E2QY78_CANLF BRCA1 associated ATM activator 1<br>OS=Canis lupus familiaris OX=9615 GN=BRAT1 PE=4 SV=1                           | 0,41  | 0,42 | 189,40 | 14634704,2 | 1  | 1 | 1 | 2,31  | 824  | 7928  |
| >sp Q9GL25 ESPB1_CANLF Epididymal sperm-binding protein 1<br>OS=Canis lupus familiaris OX=9615 GN=ELSPBP1 PE=1 SV=1                        | 3,78  | 1,41 | 287,00 | 14553556,4 | 10 | 3 | 1 | 12,65 | 245  | 36    |
| >tr F1PEZ5 F1PEZ5_CANLF Laminin subunit alpha 2 OS=Canis lupus familiaris<br>OX=9615 GN=LAMA2 PE=4 SV=3                                    | 0,70  | 0,62 | 78,70  | 14359506,4 | 5  | 1 | 0 | 0,51  | 3112 | 8576  |
| >sp Q9XS65 PTGDS_CANLF Prostaglandin-H2 D-isomerase OS=Canis lupus familiaris<br>OX=9615 GN=PTGDS PE=2 SV=1                                | 1,10  | 0,72 | 242,20 | 13819713,3 | 6  | 3 | 1 | 32,46 | 191  | 165   |
| >tr A0A5F4CCD0 A0A5F4CCD0_CANLF Cysteine rich secretory protein 2<br>OS=Canis lupus familiaris OX=9615 GN=CRISP2 PE=3 SV=1                 | 4,55  | 4,06 | 356,50 | 13780661,0 | 8  | 2 | 1 | 10,29 | 311  | 11017 |
| >tr E2RSI6 E2RSI6_CANLF Ezrin OS=Canis lupus familiaris<br>OX=9615 GN=EZR PE=4 SV=1                                                        | 2,68  | 2,64 | 307,50 | 13754811,4 | 3  | 1 | 0 | 2,90  | 586  | 15650 |
| >tr F1PB68 F1PB68_CANLF Olfactomedin 4 OS=Canis lupus familiaris<br>OX=9615 GN=OLFM4 PE=4 SV=3                                             | 7,39  | 3,93 | 405,80 | 13649912,6 | 5  | 3 | 0 | 9,64  | 477  | 17246 |
| >sp Q9XS65 PTGDS_CANLF Prostaglandin-H2 D-isomerase OS=Canis lupus familiaris<br>OX=9615 GN=PTGDS PE=2 SV=1                                | 5,25  | 4,02 | 544,60 | 13397958,5 | 10 | 2 | 1 | 16,23 | 191  | 165   |
| >tr F6Y258 F6Y258_CANLF General transcription factor Iii OS=Canis lupus familiaris<br>OX=9615 GN=GTF2I PE=4 SV=1                           | 0,10  | 0,07 | 91,40  | 13390505,4 | 2  | 1 | 0 | 0,70  | 999  | 5437  |
| >tr E2RCT1 E2RCT1_CANLF WAP domain-containing protein                                                                                      | 5,46  | 5,35 | 574,60 | 13072308,9 | 5  | 2 | 1 | 13,79 | 116  | 21717 |

OS=Canis lupus familiaris OX=9615 PE=4 SV=2

|                                                                                                                                              |       |      |        |            |    |   |   |       |      |       |
|----------------------------------------------------------------------------------------------------------------------------------------------|-------|------|--------|------------|----|---|---|-------|------|-------|
| >tr J9P3D0 J9P3D0_CANLF Solute carrier family 4 member 9<br>OS=Canis lupus familiaris OX=9615 GN=SLC4A9 PE=3 SV=2                            | 0,48  | 0,44 | 181,80 | 12726751,4 | 3  | 1 | 0 | 1,12  | 893  | 31921 |
| >tr E2RNH2 E2RNH2_CANLF Ras protein specific guanine nucleotide releasing factor 1<br>OS=Canis lupus familiaris OX=9615 GN=RASGRF1 PE=4 SV=2 | 0,47  | 0,45 | 100,30 | 12402737,6 | 2  | 1 | 0 | 0,39  | 1287 | 9564  |
| >tr J9NS29 J9NS29_CANLF Cystatin domain-containing protein<br>OS=Canis lupus familiaris OX=9615 GN=LOC607874 PE=4 SV=2                       | 4,26  | 4,20 | 522,20 | 11828286,0 | 4  | 1 | 0 | 4,79  | 313  | 30016 |
| >tr A0A5F4C6B5 A0A5F4C6B5_CANLF Plastin 3 OS=Canis lupus familiaris<br>OX=9615 GN=PLS3 PE=4 SV=1                                             | 4,01  | 2,06 | 389,30 | 11704135,3 | 6  | 2 | 0 | 9,39  | 639  | 30730 |
| >tr F1Q1M8 F1Q1M8_CANLF Beta-N-acetylhexosaminidase OS=Canis lupus familiaris<br>OX=9615 GN=HEXB PE=3 SV=3                                   | 1,80  | 1,76 | 323,30 | 11621449,5 | 3  | 1 | 0 | 8,18  | 330  | 5947  |
| >tr A0A5F4CCD0 A0A5F4CCD0_CANLF Cysteine rich secretory protein 2<br>OS=Canis lupus familiaris OX=9615 GN=CRISP2 PE=3 SV=1                   | 5,96  | 4,58 | 537,50 | 11415435,2 | 6  | 2 | 1 | 16,40 | 311  | 11017 |
| >tr A0A5F4CQU2 A0A5F4CQU2_CANLF Ig-like domain-containing protein<br>OS=Canis lupus familiaris OX=9615 GN=DLA-DMB PE=3 SV=1                  | 0,48  | 0,48 | 137,20 | 11331722,5 | 1  | 1 | 0 | 4,10  | 244  | 18966 |
| >tr A0A5F4CYM0 A0A5F4CYM0_CANLF Quiescin sulphydryl oxidase 2<br>OS=Canis lupus familiaris OX=9615 GN=QSOX2 PE=4 SV=1                        | 1,26  | 1,26 | 169,10 | 11093475,4 | 1  | 1 | 0 | 1,42  | 636  | 1464  |
| >tr J9P1P6 J9P1P6_CANLF Coiled-coil domain-containing protein 25<br>OS=Canis lupus familiaris OX=9615 PE=3 SV=2                              | 1,21  | 1,11 | 56,50  | 10792952,3 | 6  | 1 | 0 | 1,71  | 292  | 12368 |
| >tr J9P432 J9P432_CANLF Glutamine--fructose-6-phosphate transaminase (isomerizing)<br>OS=Canis lupus familiaris OX=9615 GN=GFPT1 PE=4 SV=2   | 0,37  | 0,29 | 190,70 | 10775970,7 | 5  | 1 | 0 | 1,18  | 677  | 7191  |
| >tr A0A5F4CKD5 A0A5F4CKD5_CANLF Polypeptide N-acetylglactosaminyltransferase OS=Canis lupus familiaris<br>OX=9615 GN=GALNT6 PE=3 SV=1        | 2,53  | 2,49 | 436,80 | 10736169,6 | 3  | 1 | 0 | 4,97  | 644  | 1617  |
| >tr A0A5F4CCD0 A0A5F4CCD0_CANLF Cysteine rich secretory protein 2<br>OS=Canis lupus familiaris OX=9615 GN=CRISP2 PE=3 SV=1                   | 5,98  | 3,04 | 484,40 | 10434750,8 | 5  | 2 | 1 | 10,29 | 311  | 11017 |
| >tr F6X9G7 F6X9G7_CANLF Lipocalin 9 OS=Canis lupus familiaris<br>OX=9615 GN=LCN9 PE=3 SV=2                                                   | 1,69  | 1,69 | 201,90 | 10361421,3 | 1  | 1 | 0 | 6,85  | 219  | 14681 |
| >tr F1Q1M8 F1Q1M8_CANLF Beta-N-acetylhexosaminidase OS=Canis lupus familiaris<br>OX=9615 GN=HEXB PE=3 SV=3                                   | 3,19  | 3,17 | 269,90 | 10278207,1 | 2  | 1 | 0 | 6,36  | 330  | 5947  |
| >tr E2R6E0 E2R6E0_CANLF Lipocln_cytosolic_FA-bd_dom domain-containing protein<br>OS=Canis lupus familiaris OX=9615 GN=LCNL1 PE=3 SV=2        | 3,56  | 3,54 | 262,40 | 10246112,3 | 2  | 1 | 0 | 3,01  | 299  | 1932  |
| >tr A0A5F4DBM1 A0A5F4DBM1_CANLF Lipocln_cytosolic_FA-bd_dom domain-containing protein OS=Canis lupus familiaris OX=9615 GN=LCN6 PE=3 SV=1    | 4,70  | 3,50 | 383,20 | 9876472,7  | 4  | 2 | 1 | 14,41 | 236  | 4304  |
| >tr A0A5F4C6B5 A0A5F4C6B5_CANLF Plastin 3 OS=Canis lupus familiaris<br>OX=9615 GN=PLS3 PE=4 SV=1                                             | 4,89  | 2,08 | 373,70 | 9821997,6  | 5  | 3 | 0 | 9,39  | 639  | 30730 |
| >tr F1PJ71 F1PJ71_CANLF Glutathione peroxidase OS=Canis lupus familiaris<br>OX=9615 GN=GPX5 PE=3 SV=2                                        | 11,20 | 3,77 | 455,70 | 9792671,4  | 14 | 5 | 0 | 26,24 | 221  | 19009 |
| >tr A0A5F4C1D8 A0A5F4C1D8_CANLF Acrosin OS=Canis lupus familiaris<br>OX=9615 GN=ACR PE=3 SV=1                                                | 1,06  | 1,06 | 182,30 | 9785536,5  | 1  | 1 | 0 | 2,13  | 423  | 43346 |
| >tr E2RJF6 E2RJF6_CANLF Mortality factor 4 like 1 OS=Canis lupus familiaris<br>OX=9615 GN=MORF4L1 PE=4 SV=3                                  | 0,17  | 0,17 | 95,40  | 9416311,9  | 1  | 1 | 0 | 4,56  | 439  | 18584 |
| >tr A0A5F4CQU2 A0A5F4CQU2_CANLF Ig-like domain-containing protein<br>OS=Canis lupus familiaris OX=9615 GN=DLA-DMB PE=3 SV=1                  | 0,89  | 0,87 | 107,60 | 9342887,3  | 2  | 1 | 0 | 4,10  | 244  | 18966 |

|                                                                                                                                        |      |      |        |           |    |   |   |       |     |       |
|----------------------------------------------------------------------------------------------------------------------------------------|------|------|--------|-----------|----|---|---|-------|-----|-------|
| >tr E2RSI6 E2RSI6_CANLF Ezrin OS=Canis lupus familiaris<br>OX=9615 GN=EZR PE=4 SV=1                                                    | 1,12 | 1,10 | 236,50 | 9024482,8 | 2  | 1 | 0 | 1,54  | 586 | 15650 |
| >tr A0A5F4C6L3 A0A5F4C6L3_CANLF Cyclic nucleotide binding domain containing 1<br>OS=Canis lupus familiaris OX=9615 GN=CNBD1 PE=4 SV=1  | 0,50 | 0,48 | 84,40  | 8524384,1 | 2  | 1 | 0 | 1,07  | 563 | 8180  |
| >tr F2Z4Q6 F2Z4Q6_CANLF Alpha fetoprotein OS=Canis lupus familiaris<br>OX=9615 GN=AFP PE=4 SV=2                                        | 7,72 | 2,87 | 404,90 | 8442472,4 | 19 | 5 | 0 | 12,56 | 637 | 24990 |
| >tr F1PJ71 F1PJ71_CANLF Glutathione peroxidase OS=Canis lupus familiaris<br>OX=9615 GN=GPX5 PE=3 SV=2                                  | 4,77 | 3,60 | 467,30 | 8437068,9 | 5  | 2 | 0 | 10,41 | 221 | 19009 |
| >tr F1PHH0 F1PHH0_CANLF Neurotrimin OS=Canis lupus familiaris<br>OX=9615 GN=NTM PE=4 SV=3                                              | 0,13 | 0,13 | 259,80 | 8302105,3 | 1  | 1 | 0 | 6,67  | 345 | 11396 |
| >tr A0A5F4D7L4 A0A5F4D7L4_CANLF Metalloproteinase inhibitor 1<br>OS=Canis lupus familiaris OX=9615 GN=TIMP1 PE=4 SV=1                  | 0,29 | 0,29 | 269,00 | 7854050,9 | 1  | 1 | 1 | 2,79  | 359 | 13115 |
| >tr F1PB68 F1PB68_CANLF Olfactomedin 4 OS=Canis lupus familiaris<br>OX=9615 GN=OLFM4 PE=4 SV=3                                         | 3,95 | 3,93 | 350,80 | 7620326,5 | 2  | 1 | 0 | 4,40  | 477 | 17246 |
| >tr J9PA86 J9PA86_CANLF Zinc finger protein 630 OS=Canis lupus familiaris<br>OX=9615 GN=ZNF630 PE=4 SV=1                               | 0,50 | 0,48 | 84,70  | 7598137,1 | 2  | 1 | 0 | 0,89  | 675 | 839   |
| >tr A0A5F4C9S3 A0A5F4C9S3_CANLF Boule homolog, RNA binding protein<br>OS=Canis lupus familiaris OX=9615 GN=BOLL PE=4 SV=1              | 0,29 | 0,24 | 198,10 | 7575300,9 | 4  | 1 | 0 | 1,92  | 365 | 16536 |
| >sp B6V8E6 CTNB1_CANLF Catenin beta-1 OS=Canis lupus familiaris<br>OX=9615 GN=CTNNB1 PE=1 SV=1                                         | 1,08 | 1,06 | 175,70 | 7563280,8 | 2  | 1 | 0 | 0,51  | 781 | 442   |
| >tr A0A5F4C3V3 A0A5F4C3V3_CANLF Olfactory receptor OS=Canis lupus familiaris<br>OX=9615 GN=OR4C11I PE=3 SV=1                           | 0,20 | 0,16 | 139,30 | 7471399,7 | 3  | 1 | 0 | 4,81  | 312 | 9939  |
| >sp Q28895 NPC2_CANLF NPC intracellular cholesterol transporter 2<br>OS=Canis lupus familiaris OX=9615 GN=NPC2 PE=2 SV=1               | 8,91 | 4,30 | 542,70 | 7356904,9 | 11 | 3 | 0 | 30,20 | 149 | 153   |
| >tr A0A5F4C6L3 A0A5F4C6L3_CANLF Cyclic nucleotide binding domain containing 1<br>OS=Canis lupus familiaris OX=9615 GN=CNBD1 PE=4 SV=1  | 0,27 | 0,20 | 78,80  | 7316858,6 | 4  | 2 | 1 | 2,13  | 563 | 8180  |
| >tr E2R5K8 E2R5K8_CANLF G protein pathway suppressor 2<br>OS=Canis lupus familiaris OX=9615 GN=GPS2 PE=4 SV=3                          | 0,14 | 0,14 | 133,30 | 7283578,6 | 1  | 1 | 0 | 3,98  | 327 | 32341 |
| >tr A0A5F4CXB9 A0A5F4CXB9_CANLF Testis expressed 9 OS=Canis lupus familiaris<br>OX=9615 GN=TEX9 PE=4 SV=1                              | 0,10 | 0,06 | 201,50 | 7191022,8 | 3  | 1 | 0 | 1,89  | 424 | 41102 |
| >tr A0A5F4CKD5 A0A5F4CKD5_CANLF Polypeptide N-acetylgalactosaminyltransferase<br>OS=Canis lupus familiaris OX=9615 GN=GALNT6 PE=3 SV=1 | 9,23 | 9,15 | 745,00 | 6980515,3 | 5  | 1 | 0 | 4,97  | 644 | 1617  |
| >tr A0A5F4C6B5 A0A5F4C6B5_CANLF Plastin 3 OS=Canis lupus familiaris<br>OX=9615 GN=PLS3 PE=4 SV=1                                       | 1,21 | 1,02 | 279,00 | 6682088,4 | 4  | 2 | 0 | 9,39  | 639 | 30730 |
| >sp O46607 GPX5_CANLF Epididymal secretory glutathione peroxidase<br>OS=Canis lupus familiaris OX=9615 GN=GPX5 PE=2 SV=1               | 2,06 | 2,01 | 383,10 | 6592133,0 | 4  | 1 | 0 | 6,79  | 221 | 564   |
| >sp Q6AW47 EST5A_CANLF Carboxylesterase 5A OS=Canis lupus familiaris<br>OX=9615 GN=CES5A PE=2 SV=1                                     | 2,14 | 2,12 | 263,40 | 6326996,9 | 2  | 1 | 0 | 3,13  | 575 | 629   |
| >tr A0A5F4C9S3 A0A5F4C9S3_CANLF Boule homolog, RNA binding protein<br>OS=Canis lupus familiaris OX=9615 GN=BOLL PE=4 SV=1              | 0,90 | 0,82 | 172,80 | 6282147,0 | 5  | 1 | 0 | 1,92  | 365 | 16536 |
| >sp P25473 CLUS_CANLF Clusterin OS=Canis lupus familiaris<br>OX=9615 GN=CLU PE=2 SV=1                                                  | 9,03 | 3,48 | 339,30 | 5882980,3 | 12 | 4 | 0 | 9,89  | 445 | 725   |
| >tr A0A5F4C6B5 A0A5F4C6B5_CANLF Plastin 3 OS=Canis lupus familiaris<br>OX=9615 GN=PLS3 PE=4 SV=1                                       | 3,10 | 2,01 | 257,60 | 5686347,3 | 3  | 2 | 0 | 6,26  | 639 | 30730 |



|                                                                                                                                            |      |      |        |           |   |   |   |       |      |       |
|--------------------------------------------------------------------------------------------------------------------------------------------|------|------|--------|-----------|---|---|---|-------|------|-------|
| >tr F1Q4G5 F1Q4G5_CANLF Helt bHLH transcription factor OS=Canis lupus familiaris<br>OX=9615 GN=HELT PE=4 SV=2                              | 0,14 | 0,14 | 192,10 | 5540898,4 | 1 | 1 | 0 | 4,76  | 231  | 31936 |
| >tr A0A5F4C1S8 A0A5F4C1S8_CANLF E3 ubiquitin-protein ligase CBL<br>OS=Canis lupus familiaris OX=9615 GN=CBL PE=4 SV=1                      | 0,14 | 0,14 | 162,50 | 5540752,4 | 1 | 1 | 0 | 0,52  | 773  | 1308  |
| >tr F1PB83 F1PB83_CANLF Integrin subunit alpha 9 OS=Canis lupus familiaris<br>OX=9615 GN=ITGA9 PE=3 SV=3                                   | 0,60 | 0,58 | 176,60 | 5423474,6 | 2 | 1 | 0 | 1,03  | 975  | 39570 |
| >tr A0A5F4CQU2 A0A5F4CQU2_CANLF Ig-like domain-containing protein<br>OS=Canis lupus familiaris OX=9615 GN=DLA-DMB PE=3 SV=1                | 0,90 | 0,90 | 108,10 | 5406225,0 | 1 | 1 | 0 | 4,10  | 244  | 18966 |
| >tr A0A5F4C6L3 A0A5F4C6L3_CANLF Cyclic nucleotide binding domain containing 1<br>OS=Canis lupus familiaris OX=9615 GN=CNBD1 PE=4 SV=1      | 0,12 | 0,10 | 89,00  | 5359118,1 | 2 | 1 | 0 | 1,07  | 563  | 8180  |
| >tr A0A5F4C3M5 A0A5F4C3M5_CANLF IQ motif containing GTPase activating<br>protein 2 OS=Canis lupus familiaris OX=9615 GN=IQGAP2 PE=4 SV=1   | 1,21 | 1,13 | 134,90 | 5297370,8 | 5 | 1 | 0 | 0,51  | 1577 | 1056  |
| >sp Q9GL25 ESPB1_CANLF Epididymal sperm-binding protein 1<br>OS=Canis lupus familiaris OX=9615 GN=ELSPBP1 PE=1 SV=1                        | 6,14 | 3,40 | 413,10 | 5162129,7 | 6 | 2 | 0 | 16,33 | 245  | 36    |
| >tr A0A5F4CHN1 A0A5F4CHN1_CANLF Serine/arginine repetitive matrix 2<br>OS=Canis lupus familiaris OX=9615 GN=SRRM2 PE=4 SV=1                | 0,14 | 0,10 | 126,30 | 5029683,4 | 2 | 2 | 0 | 0,47  | 2564 | 3180  |
| >sp O18840 ACTB_CANLF Actin, cytoplasmic 1 OS=Canis lupus familiaris<br>OX=9615 GN=ACTB PE=2 SV=3                                          | 9,51 | 3,75 | 355,60 | 4914556,3 | 8 | 5 | 1 | 22,13 | 375  | 642   |
| >sp P25473 CLUS_CANLF Clusterin OS=Canis lupus familiaris<br>OX=9615 GN=CLU PE=2 SV=1                                                      | 1,35 | 1,06 | 212,40 | 4870772,8 | 2 | 2 | 1 | 8,54  | 445  | 725   |
| >tr E2RAK5 E2RAK5_CANLF Sulfotransferase OS=Canis lupus familiaris<br>OX=9615 GN=SULT1C3 PE=3 SV=1                                         | 0,14 | 0,12 | 139,20 | 4789099,3 | 2 | 1 | 0 | 2,30  | 304  | 12938 |
| >sp O46607 GPX5_CANLF Epididymal secretory glutathione peroxidase<br>OS=Canis lupus familiaris OX=9615 GN=GPX5 PE=2 SV=1                   | 2,75 | 2,68 | 445,60 | 4782732,3 | 5 | 1 | 0 | 6,79  | 221  | 564   |
| >tr Q5TJG5 Q5TJG5_CANLF MHC class II antigen DO alpha OS=Canis lupus familiaris<br>OX=9615 GN=DLA-DOA PE=3 SV=1                            | 0,75 | 0,73 | 136,00 | 4692040,7 | 2 | 1 | 0 | 4,00  | 250  | 41318 |
| >tr J9NVE0 J9NVE0_CANLF KRAB domain-containing protein<br>OS=Canis lupus familiaris OX=9615 GN=LOC606925 PE=4 SV=1                         | 0,20 | 0,18 | 88,00  | 4692040,7 | 2 | 1 | 0 | 4,08  | 147  | 3752  |
| >tr F1Q107 F1Q107_CANLF Multiple C2 and transmembrane domain containing 1<br>OS=Canis lupus familiaris OX=9615 GN=MCTP1 PE=4 SV=3          | 0,10 | 0,07 | 112,80 | 4686595,4 | 1 | 1 | 0 | 1,06  | 752  | 28373 |
| >tr J9P432 J9P432_CANLF Glutamine--fructose-6-phosphate transaminase (isomerizing)<br>OS=Canis lupus familiaris OX=9615 GN=GFPT1 PE=4 SV=2 | 0,11 | 0,09 | 170,30 | 4669041,6 | 2 | 1 | 0 | 1,18  | 677  | 7191  |
| >tr E2R6E0 E2R6E0_CANLF Lipocln_cytosolic_FA-bd_dom domain-containing protein<br>OS=Canis lupus familiaris OX=9615 GN=LCNL1 PE=3 SV=2      | 2,80 | 2,68 | 295,10 | 4653961,3 | 7 | 1 | 0 | 3,68  | 299  | 1932  |
| >tr F2Z4Q6 F2Z4Q6_CANLF Alpha fetoprotein OS=Canis lupus familiaris<br>OX=9615 GN=AFP PE=4 SV=2                                            | 6,36 | 2,92 | 381,70 | 4644236,7 | 8 | 4 | 0 | 9,26  | 637  | 24990 |
| >tr J9NS29 J9NS29_CANLF Cystatin domain-containing protein<br>OS=Canis lupus familiaris OX=9615 GN=LOC607874 PE=4 SV=2                     | 3,06 | 3,06 | 245,30 | 4623424,8 | 1 | 1 | 0 | 4,79  | 313  | 30016 |
| >tr J9NS29 J9NS29_CANLF Cystatin domain-containing protein<br>OS=Canis lupus familiaris OX=9615 GN=LOC607874 PE=4 SV=2                     | 1,50 | 1,48 | 234,90 | 4619058,7 | 2 | 1 | 0 | 4,79  | 313  | 30016 |
| >tr J9P9J4 J9P9J4_CANLF Aldehyde dehydrogenase 1 family member A1<br>OS=Canis lupus familiaris OX=9615 GN=ALDH1A1 PE=3 SV=1                | 6,43 | 3,25 | 426,50 | 4616697,4 | 3 | 3 | 0 | 7,44  | 484  | 13765 |
| >tr F2Z4Q6 F2Z4Q6_CANLF Alpha fetoprotein OS=Canis lupus familiaris<br>OX=9615 GN=AFP PE=4 SV=2                                            | 2,12 | 2,10 | 284,30 | 4585107,4 | 2 | 1 | 0 | 2,04  | 637  | 24990 |
| >tr F6X5V2 F6X5V2_CANLF Dual oxidase maturation factor 2                                                                                   | 0,18 | 0,17 | 181,30 | 4416978,8 | 2 | 1 | 1 | 7,81  | 320  | 40162 |

|                                                                               |      |      |        |           |   |   |   |       |      |       |
|-------------------------------------------------------------------------------|------|------|--------|-----------|---|---|---|-------|------|-------|
| OS=Canis lupus familiaris OX=9615 GN=DUOXA2 PE=3 SV=1                         |      |      |        |           |   |   |   |       |      |       |
| >sp Q9GL25 ESPB1_CANLF Epididymal sperm-binding protein 1                     | 4,71 | 2,46 | 241,90 | 4167228,6 | 3 | 3 | 0 | 19,59 | 245  | 36    |
| OS=Canis lupus familiaris OX=9615 GN=ELSPBP1 PE=1 SV=1                        |      |      |        |           |   |   |   |       |      |       |
| >tr E2R6E0 E2R6E0_CANLF Lipocln_cytosolic_FA-bd_dom domain-containing protein | 9,30 | 3,76 | 419,60 | 3895695,2 | 9 | 3 | 0 | 10,37 | 299  | 1932  |
| OS=Canis lupus familiaris OX=9615 GN=LCNL1 PE=3 SV=2                          |      |      |        |           |   |   |   |       |      |       |
| >sp Q6AW47 EST5A_CANLF Carboxylesterase 5A OS=Canis lupus familiaris          | 3,44 | 3,42 | 292,40 | 3841637,6 | 2 | 1 | 0 | 3,13  | 575  | 629   |
| OX=9615 GN=CES5A PE=2 SV=1                                                    |      |      |        |           |   |   |   |       |      |       |
| >tr A0A5F4C6L3 A0A5F4C6L3_CANLF Cyclic nucleotide binding domain containing 1 | 0,16 | 0,12 | 77,30  | 3829222,7 | 3 | 1 | 0 | 1,07  | 563  | 8180  |
| OS=Canis lupus familiaris OX=9615 GN=CNBD1 PE=4 SV=1                          |      |      |        |           |   |   |   |       |      |       |
| >tr F1PQ67 F1PQ67_CANLF LARGE xylosyl- and glucuronyltransferase 2            | 0,18 | 0,18 | 138,60 | 3824495,2 | 1 | 1 | 0 | 2,08  | 721  | 39792 |
| OS=Canis lupus familiaris OX=9615 GN=LARGE2 PE=4 SV=3                         |      |      |        |           |   |   |   |       |      |       |
| >tr E2RQF9 E2RQF9_CANLF Minichromosome maintenance complex component 3        | 0,89 | 0,89 | 289,00 | 3705304,3 | 1 | 1 | 0 | 0,25  | 1980 | 24083 |
| associated protein OS=Canis lupus familiaris OX=9615 GN=MCM3AP PE=4 SV=3      |      |      |        |           |   |   |   |       |      |       |
| >tr E2RG75 E2RG75_CANLF Inactive ribonuclease-like protein 9                  | 2,42 | 2,42 | 241,70 | 3580465,0 | 1 | 1 | 0 | 10,10 | 198  | 41734 |
| OS=Canis lupus familiaris OX=9615 GN=RNASE9 PE=3 SV=2                         |      |      |        |           |   |   |   |       |      |       |
| >sp P49822 ALBU_CANLF Albumin OS=Canis lupus familiaris                       | 0,77 | 0,47 | 356,10 | 3532564,0 | 2 | 2 | 1 | 7,24  | 608  | 490   |
| OX=9615 GN=ALB PE=1 SV=3                                                      |      |      |        |           |   |   |   |       |      |       |
| >tr A0A5F4C2J2 A0A5F4C2J2_CANLF Alpha-mannosidase OS=Canis lupus familiaris   | 1,37 | 1,36 | 204,00 | 3529999,1 | 2 | 1 | 0 | 2,21  | 1042 | 3130  |
| OX=9615 GN=MAN2B1 PE=3 SV=1                                                   |      |      |        |           |   |   |   |       |      |       |
| >tr E2RGF2 E2RGF2_CANLF BRCA1 associated protein 1 OS=Canis lupus familiaris  | 0,76 | 0,72 | 265,60 | 3429037,4 | 3 | 1 | 1 | 7,62  | 446  | 25285 |
| OX=9615 GN=BAP1 PE=3 SV=2                                                     |      |      |        |           |   |   |   |       |      |       |
| >tr J9P758 J9P758_CANLF Sorcin OS=Canis lupus familiaris                      | 0,20 | 0,20 | 150,60 | 3393556,2 | 1 | 1 | 0 | 2,30  | 348  | 7242  |
| OX=9615 GN=SRI PE=4 SV=2                                                      |      |      |        |           |   |   |   |       |      |       |
| >tr J9NY16 J9NY16_CANLF Zinc finger protein 541 OS=Canis lupus familiaris     | 0,35 | 0,35 | 172,40 | 3342780,6 | 1 | 1 | 0 | 0,96  | 1357 | 25760 |
| OX=9615 GN=ZNF541 PE=4 SV=2                                                   |      |      |        |           |   |   |   |       |      |       |
| >tr E2RKA1 E2RKA1_CANLF Tyrosine-protein kinase receptor                      | 0,27 | 0,24 | 94,50  | 3308700,2 | 4 | 1 | 0 | 0,97  | 822  | 20603 |
| OS=Canis lupus familiaris OX=9615 GN=NTRK2 PE=3 SV=2                          |      |      |        |           |   |   |   |       |      |       |
| >tr E2RHS5 E2RHS5_CANLF tRNA (guanine-N(7)-)-methyltransferase non-catalytic  | 0,11 | 0,09 | 56,80  | 3238526,3 | 2 | 1 | 0 | 1,72  | 406  | 22738 |
| subunit WDR4 OS=Canis lupus familiaris OX=9615 GN=WDR4 PE=3 SV=1              |      |      |        |           |   |   |   |       |      |       |
| >tr E2RQ68 E2RQ68_CANLF Ceramide synthase 2 OS=Canis lupus familiaris         | 0,28 | 0,28 | 76,70  | 3214573,7 | 1 | 1 | 0 | 2,62  | 381  | 26313 |
| OX=9615 GN=CERS2 PE=4 SV=2                                                    |      |      |        |           |   |   |   |       |      |       |
| >tr A0A5F4CCD0 A0A5F4CCD0_CANLF Cysteine rich secretory protein 2             | 2,39 | 1,33 | 376,80 | 3192188,5 | 3 | 2 | 1 | 10,29 | 311  | 11017 |
| OS=Canis lupus familiaris OX=9615 GN=CRISP2 PE=3 SV=1                         |      |      |        |           |   |   |   |       |      |       |
| >tr A0A5F4D662 A0A5F4D662_CANLF Par-3 family cell polarity regulator beta     | 0,28 | 0,24 | 133,60 | 3190170,7 | 3 | 1 | 0 | 0,70  | 1142 | 8202  |
| OS=Canis lupus familiaris OX=9615 GN=PARD3B PE=3 SV=1                         |      |      |        |           |   |   |   |       |      |       |
| >tr A0A5F4CPK4 A0A5F4CPK4_CANLF Formin binding protein 1                      | 0,91 | 0,89 | 80,90  | 3159596,1 | 2 | 1 | 0 | 1,42  | 562  | 14071 |
| OS=Canis lupus familiaris OX=9615 GN=FNBP1 PE=4 SV=1                          |      |      |        |           |   |   |   |       |      |       |
| >tr F1PRL1 F1PRL1_CANLF Dppa2_A domain-containing protein                     | 0,18 | 0,12 | 51,90  | 3152783,5 | 4 | 1 | 0 | 2,79  | 179  | 17222 |
| OS=Canis lupus familiaris OX=9615 PE=4 SV=2                                   |      |      |        |           |   |   |   |       |      |       |
| >tr F1PPY4 F1PPY4_CANLF Urokinase-type plasminogen activator                  | 0,32 | 0,32 | 145,70 | 3137645,3 | 1 | 1 | 0 | 3,31  | 543  | 42729 |
| OS=Canis lupus familiaris OX=9615 GN=PLAU PE=4 SV=2                           |      |      |        |           |   |   |   |       |      |       |
| >sp P49822 ALBU_CANLF Albumin OS=Canis lupus familiaris                       | 3,12 | 3,08 | 359,10 | 3127780,9 | 3 | 1 | 0 | 2,14  | 608  | 490   |
| OX=9615 GN=ALB PE=1 SV=3                                                      |      |      |        |           |   |   |   |       |      |       |
| >tr A0A5F4C9S3 A0A5F4C9S3_CANLF Boule homolog, RNA binding protein            | 0,14 | 0,12 | 80,00  | 3112925,1 | 2 | 1 | 0 | 1,92  | 365  | 16536 |
| OS=Canis lupus familiaris OX=9615 GN=BOLL PE=4 SV=1                           |      |      |        |           |   |   |   |       |      |       |

|                                                                                                                                         |      |      |        |           |   |   |   |       |      |       |
|-----------------------------------------------------------------------------------------------------------------------------------------|------|------|--------|-----------|---|---|---|-------|------|-------|
| >sp Q6AW47 EST5A_CANLF Carboxylesterase 5A OS=Canis lupus familiaris<br>OX=9615 GN=CES5A PE=2 SV=1                                      | 2,17 | 2,15 | 264,20 | 3043005,1 | 2 | 1 | 0 | 3,13  | 575  | 629   |
| >tr F1PB68 F1PB68_CANLF Olfactomedin 4 OS=Canis lupus familiaris<br>OX=9615 GN=OLFM4 PE=4 SV=3                                          | 3,52 | 3,52 | 379,60 | 3020465,0 | 1 | 1 | 0 | 4,40  | 477  | 17246 |
| >tr F1PCA2 F1PCA2_CANLF Tripartite motif containing 27 OS=Canis lupus familiaris<br>OX=9615 GN=TRIM27 PE=4 SV=3                         | 0,96 | 0,96 | 207,60 | 2879057,6 | 1 | 1 | 0 | 4,98  | 462  | 7129  |
| >tr E2RQN2 E2RQN2_CANLF Peptidase S1 domain-containing protein<br>OS=Canis lupus familiaris OX=9615 GN=PRSS58 PE=4 SV=1                 | 1,68 | 1,66 | 400,60 | 2788005,1 | 2 | 1 | 0 | 10,79 | 241  | 44651 |
| >tr J9P434 J9P434_CANLF Myotubularin related protein 14 OS=Canis lupus familiaris<br>OX=9615 GN=MTMR14 PE=4 SV=2                        | 0,57 | 0,55 | 130,50 | 2742231,2 | 2 | 1 | 0 | 1,51  | 596  | 17413 |
| >tr E2R5P5 E2R5P5_CANLF Calcyclin OS=Canis lupus familiaris<br>OX=9615 GN=S100A8 PE=4 SV=2                                              | 2,44 | 2,38 | 506,20 | 2695848,2 | 4 | 1 | 0 | 14,66 | 191  | 27843 |
| >tr E2R6E0 E2R6E0_CANLF Lipocln_cytosolic_FA-bd_dom domain-containing protein<br>OS=Canis lupus familiaris OX=9615 GN=LCNL1 PE=3 SV=2   | 2,55 | 2,39 | 372,70 | 2669779,5 | 9 | 1 | 0 | 3,68  | 299  | 1932  |
| >tr E2R4X9 E2R4X9_CANLF Pre-mRNA processing factor 8 OS=Canis lupus familiaris<br>OX=9615 GN=PRPF8 PE=4 SV=2                            | 0,20 | 0,20 | 77,40  | 2666423,5 | 1 | 1 | 0 | 0,34  | 2335 | 29235 |
| >tr A0A5F4D6N0 A0A5F4D6N0_CANLF IF rod domain-containing protein<br>OS=Canis lupus familiaris OX=9615 PE=3 SV=1                         | 0,55 | 0,55 | 227,40 | 2567902,8 | 1 | 1 | 1 | 7,06  | 439  | 38799 |
| >tr A0A5F4DGF5 A0A5F4DGF5_CANLF Alkaline phosphatase<br>OS=Canis lupus familiaris OX=9615 GN=ALPL PE=3 SV=1                             | 1,07 | 1,05 | 205,70 | 2494054,1 | 2 | 1 | 0 | 1,92  | 572  | 6357  |
| >tr A0A5F4CWZ1 A0A5F4CWZ1_CANLF Nuclear receptor subfamily 3 group C<br>member 2 OS=Canis lupus familiaris OX=9615 GN=NR3C2 PE=4 SV=1   | 0,97 | 0,97 | 258,30 | 2492161,0 | 1 | 1 | 1 | 2,43  | 947  | 33679 |
| >tr J9NS29 J9NS29_CANLF Cystatin domain-containing protein<br>OS=Canis lupus familiaris OX=9615 GN=LOC607874 PE=4 SV=2                  | 1,00 | 0,96 | 337,10 | 2483724,5 | 3 | 1 | 0 | 9,58  | 313  | 30016 |
| >tr E2RCT1 E2RCT1_CANLF WAP domain-containing protein<br>OS=Canis lupus familiaris OX=9615 PE=4 SV=2                                    | 3,68 | 3,68 | 248,90 | 2350865,6 | 1 | 1 | 0 | 13,79 | 116  | 21717 |
| >tr F1PB68 F1PB68_CANLF Olfactomedin 4 OS=Canis lupus familiaris<br>OX=9615 GN=OLFM4 PE=4 SV=3                                          | 1,32 | 1,32 | 256,10 | 2328468,0 | 1 | 1 | 0 | 4,40  | 477  | 17246 |
| >tr F6Y1C9 F6Y1C9_CANLF DNA polymerase OS=Canis lupus familiaris<br>OX=9615 GN=POLA1 PE=3 SV=1                                          | 0,83 | 0,83 | 111,00 | 2328468,0 | 1 | 1 | 0 | 1,70  | 1467 | 1834  |
| >tr E2R6E0 E2R6E0_CANLF Lipocln_cytosolic_FA-bd_dom domain-containing protein<br>OS=Canis lupus familiaris OX=9615 GN=LCNL1 PE=3 SV=2   | 3,43 | 2,44 | 314,30 | 2316264,1 | 2 | 2 | 0 | 7,36  | 299  | 1932  |
| >tr F1PZI2 F1PZI2_CANLF RING-type E3 ubiquitin transferase<br>OS=Canis lupus familiaris OX=9615 GN=MIB2 PE=4 SV=3                       | 0,88 | 0,80 | 235,50 | 2279261,5 | 5 | 1 | 0 | 1,19  | 1005 | 7737  |
| >sp P25291 GP2_CANLF Pancreatic secretory granule membrane major glycoprotein<br>GP2 OS=Canis lupus familiaris OX=9615 GN=GP2 PE=1 SV=1 | 0,13 | 0,13 | 168,80 | 2219087,2 | 1 | 1 | 0 | 2,36  | 509  | 142   |
| >tr A0A5F4DGF5 A0A5F4DGF5_CANLF Alkaline phosphatase<br>OS=Canis lupus familiaris OX=9615 GN=ALPL PE=3 SV=1                             | 1,08 | 1,08 | 177,20 | 2217922,9 | 1 | 1 | 0 | 1,92  | 572  | 6357  |
| >tr A0A5F4BT11 A0A5F4BT11_CANLF Ecdysoneless cell cycle regulator<br>OS=Canis lupus familiaris OX=9615 GN=ECD PE=4 SV=1                 | 0,13 | 0,13 | 127,10 | 2211908,5 | 1 | 1 | 0 | 1,52  | 656  | 8613  |
| >tr J9JHE0 J9JHE0_CANLF cGMP-dependent protein kinase OS=Canis lupus familiaris<br>OX=9615 GN=PRKG1 PE=3 SV=2                           | 0,13 | 0,14 | 78,50  | 2210663,8 | 1 | 1 | 0 | 2,68  | 671  | 5787  |
| >tr E2R5P5 E2R5P5_CANLF Calcyclin OS=Canis lupus familiaris<br>OX=9615 GN=S100A8 PE=4 SV=2                                              | 1,00 | 0,98 | 203,80 | 2184448,7 | 2 | 1 | 0 | 14,66 | 191  | 27843 |

|                                                                                                                                          |      |      |        |           |   |   |   |       |      |       |
|------------------------------------------------------------------------------------------------------------------------------------------|------|------|--------|-----------|---|---|---|-------|------|-------|
| >tr A0A5F4C379 A0A5F4C379_CANLF Protein kinase C OS=Canis lupus familiaris<br>OX=9615 GN=PRKD2 PE=3 SV=1                                 | 0,20 | 0,20 | 30,40  | 2174936,4 | 1 | 1 | 0 | 0,49  | 1018 | 9891  |
| >tr E2R0Z6 E2R0Z6_CANLF Junctophilin OS=Canis lupus familiaris<br>OX=9615 GN=JPH1 PE=3 SV=1                                              | 0,27 | 0,25 | 50,00  | 2163667,0 | 2 | 1 | 0 | 1,06  | 662  | 32945 |
| >tr F1Q0I8 F1Q0I8_CANLF Glutathione transferase OS=Canis lupus familiaris<br>OX=9615 GN=LOC476006 PE=4 SV=3                              | 0,10 | 0,09 | 79,10  | 2143810,1 | 1 | 1 | 0 | 9,96  | 241  | 8185  |
| >tr F1Q074 F1Q074_CANLF A-kinase anchoring protein 13 OS=Canis lupus familiaris<br>OX=9615 GN=AKAP13 PE=4 SV=3                           | 0,67 | 0,59 | 187,30 | 2124844,0 | 5 | 1 | 0 | 0,29  | 2781 | 14817 |
| >tr E2R0Z6 E2R0Z6_CANLF Junctophilin OS=Canis lupus familiaris<br>OX=9615 GN=JPH1 PE=3 SV=1                                              | 1,01 | 0,99 | 61,00  | 2087695,2 | 2 | 1 | 0 | 1,06  | 662  | 32945 |
| >tr F1PRL1 F1PRL1_CANLF Dppa2_A domain-containing protein<br>OS=Canis lupus familiaris OX=9615 PE=4 SV=2                                 | 0,36 | 0,20 | 54,60  | 2073501,6 | 9 | 1 | 0 | 2,79  | 179  | 17222 |
| >tr F1PGP5 F1PGP5_CANLF Argonaute RISC component 1 OS=Canis lupus familiaris<br>OX=9615 GN=AGO1 PE=3 SV=3                                | 0,38 | 0,38 | 203,20 | 2071553,1 | 1 | 1 | 0 | 1,25  | 1037 | 5034  |
| >tr A0A5F4CKD5 A0A5F4CKD5_CANLF Polypeptide N-acetylglucosaminyltransferase OS=Canis lupus familiaris<br>OX=9615 GN=GALNT6 PE=3 SV=1     | 0,43 | 0,44 | 222,30 | 2056818,1 | 1 | 1 | 0 | 4,97  | 644  | 1617  |
| >tr E2RQC4 E2RQC4_CANLF WW domain-containing oxidoreductase<br>OS=Canis lupus familiaris OX=9615 GN=WWOX PE=4 SV=3                       | 0,11 | 0,09 | 133,30 | 2054856,1 | 2 | 1 | 0 | 2,05  | 391  | 23035 |
| >tr A0A5F4CCD0 A0A5F4CCD0_CANLF Cysteine rich secretory protein 2<br>OS=Canis lupus familiaris OX=9615 GN=CRISP2 PE=3 SV=1               | 2,89 | 2,46 | 379,70 | 2033646,3 | 2 | 2 | 1 | 16,40 | 311  | 11017 |
| >tr A0A5F4C2Y3 A0A5F4C2Y3_CANLF Carboxypeptidase X, M14 family member 1<br>OS=Canis lupus familiaris OX=9615 GN=CPXM1 PE=3 SV=1          | 0,25 | 0,23 | 61,60  | 2024378,6 | 2 | 1 | 0 | 1,21  | 661  | 21027 |
| >sp O46607 GPX5_CANLF Epididymal secretory glutathione peroxidase<br>OS=Canis lupus familiaris OX=9615 GN=GPX5 PE=2 SV=1                 | 0,90 | 0,84 | 263,30 | 2007399,4 | 4 | 1 | 0 | 6,79  | 221  | 564   |
| >tr A0A5F4CDM1 A0A5F4CDM1_CANLF L-lactate dehydrogenase<br>OS=Canis lupus familiaris OX=9615 PE=3 SV=1                                   | 0,50 | 0,48 | 109,10 | 1966922,5 | 2 | 1 | 0 | 2,87  | 279  | 43073 |
| >tr F6XBC9 F6XBC9_CANLF Olfactory receptor OS=Canis lupus familiaris<br>OX=9615 GN=LOC607447 PE=3 SV=2                                   | 0,18 | 0,18 | 60,90  | 1966414,9 | 1 | 1 | 0 | 4,81  | 312  | 3183  |
| >tr A0A5F4DKA1 A0A5F4DKA1_CANLF Zinc finger protein 335<br>OS=Canis lupus familiaris OX=9615 GN=ZNF335 PE=4 SV=1                         | 0,12 | 0,12 | 64,50  | 1925598,9 | 1 | 1 | 0 | 1,59  | 1380 | 32203 |
| >tr A0A5F4CCD0 A0A5F4CCD0_CANLF Cysteine rich secretory protein 2<br>OS=Canis lupus familiaris OX=9615 GN=CRISP2 PE=3 SV=1               | 3,74 | 3,66 | 351,10 | 1907787,9 | 5 | 1 | 0 | 4,82  | 311  | 11017 |
| >sp B6V8E6 CTNB1_CANLF Catenin beta-1 OS=Canis lupus familiaris<br>OX=9615 GN=CTNNB1 PE=1 SV=1                                           | 0,10 | 0,10 | 122,70 | 1897586,5 | 1 | 1 | 0 | 0,51  | 781  | 442   |
| >tr J9NUX6 J9NUX6_CANLF Protein phosphatase 6 regulatory subunit 2<br>OS=Canis lupus familiaris OX=9615 GN=PPP6R2 PE=3 SV=2              | 0,10 | 0,10 | 251,30 | 1884140,0 | 1 | 1 | 0 | 5,59  | 930  | 3081  |
| >tr F1PS33 F1PS33_CANLF Otogelin OS=Canis lupus familiaris<br>OX=9615 GN=OTOG PE=4 SV=3                                                  | 0,15 | 0,14 | 162,40 | 1802840,6 | 2 | 2 | 2 | 1,67  | 2876 | 38364 |
| >sp Q9GL25 ESPB1_CANLF Epididymal sperm-binding protein 1<br>OS=Canis lupus familiaris OX=9615 GN=ELSPBP1 PE=1 SV=1                      | 6,20 | 3,06 | 299,00 | 1777423,2 | 7 | 2 | 0 | 6,94  | 245  | 36    |
| >tr J9NS29 J9NS29_CANLF Cystatin domain-containing protein<br>OS=Canis lupus familiaris OX=9615 GN=LOC607874 PE=4 SV=2                   | 0,34 | 0,32 | 175,00 | 1762960,3 | 2 | 1 | 0 | 9,58  | 313  | 30016 |
| >tr A0A5F4C3M5 A0A5F4C3M5_CANLF IQ motif containing GTPase activating<br>protein 2 OS=Canis lupus familiaris OX=9615 GN=IQGAP2 PE=4 SV=1 | 0,87 | 0,81 | 107,00 | 1742818,9 | 4 | 1 | 0 | 0,51  | 1577 | 1056  |

|                                                                                                                                          |      |      |        |           |   |   |   |       |      |       |
|------------------------------------------------------------------------------------------------------------------------------------------|------|------|--------|-----------|---|---|---|-------|------|-------|
| >sp Q6AW47 EST5A_CANLF Carboxylesterase 5A OS=Canis lupus familiaris<br>OX=9615 GN=CES5A PE=2 SV=1                                       | 3,14 | 3,12 | 351,30 | 1724592,0 | 2 | 1 | 0 | 3,65  | 575  | 629   |
| >tr E2R0Z6 E2R0Z6_CANLF Junctophilin OS=Canis lupus familiaris<br>OX=9615 GN=JPH1 PE=3 SV=1                                              | 0,21 | 0,19 | 95,60  | 1700379,7 | 2 | 1 | 0 | 1,06  | 662  | 32945 |
| >tr F1PB83 F1PB83_CANLF Integrin subunit alpha 9 OS=Canis lupus familiaris<br>OX=9615 GN=ITGA9 PE=3 SV=3                                 | 0,12 | 0,12 | 147,90 | 1696053,5 | 1 | 1 | 0 | 1,03  | 975  | 39570 |
| >tr F6XVF5 F6XVF5_CANLF WD repeat domain 72 OS=Canis lupus familiaris<br>OX=9615 GN=WDR72 PE=4 SV=2                                      | 1,08 | 1,08 | 120,10 | 1689397,3 | 1 | 1 | 0 | 0,75  | 1071 | 16644 |
| >tr A0A5F4CS14 A0A5F4CS14_CANLF Guanylate cyclase OS=Canis lupus familiaris<br>OX=9615 GN=GUCY1A2 PE=3 SV=1                              | 0,39 | 0,37 | 147,30 | 1685659,3 | 2 | 1 | 0 | 1,03  | 773  | 1560  |
| >tr E2RCT1 E2RCT1_CANLF WAP domain-containing protein<br>OS=Canis lupus familiaris OX=9615 PE=4 SV=2                                     | 3,04 | 3,00 | 392,80 | 1662777,2 | 3 | 1 | 0 | 13,79 | 116  | 21717 |
| >tr F1PBA6 F1PBA6_CANLF HIVEP zinc finger 1 OS=Canis lupus familiaris<br>OX=9615 GN=HIVEP1 PE=4 SV=2                                     | 0,25 | 0,25 | 276,50 | 1627631,4 | 1 | 1 | 1 | 1,61  | 2726 | 6985  |
| >tr J9NSV2 J9NSV2_CANLF Olfactory receptor OS=Canis lupus familiaris<br>OX=9615 GN=OR5AC27 PE=3 SV=2                                     | 0,20 | 0,18 | 43,10  | 1612760,8 | 2 | 1 | 0 | 5,88  | 306  | 42329 |
| >tr F6XXH4 F6XXH4_CANLF Transmembrane channel-like protein<br>OS=Canis lupus familiaris OX=9615 GN=TMC4 PE=3 SV=1                        | 0,77 | 0,77 | 239,20 | 1516687,0 | 1 | 1 | 0 | 2,72  | 736  | 31723 |
| >sp Q6AW47 EST5A_CANLF Carboxylesterase 5A OS=Canis lupus familiaris<br>OX=9615 GN=CES5A PE=2 SV=1                                       | 2,38 | 2,36 | 282,60 | 1499423,9 | 2 | 1 | 0 | 3,65  | 575  | 629   |
| >tr A0A5F4BXF4 A0A5F4BXF4_CANLF Signal transducer and activator of<br>transcription OS=Canis lupus familiaris OX=9615 GN=STAT6 PE=3 SV=1 | 0,81 | 0,79 | 99,30  | 1490042,4 | 2 | 1 | 0 | 0,86  | 927  | 29502 |
| >tr A0A5F4D3Q2 A0A5F4D3Q2_CANLF Non-specific serine/threonine protein kinase<br>OS=Canis lupus familiaris OX=9615 GN=ATR PE=3 SV=1       | 0,12 | 0,12 | 143,90 | 1479485,4 | 1 | 1 | 0 | 0,39  | 2583 | 7077  |
| >tr E2QZP6 E2QZP6_CANLF Tectorin alpha OS=Canis lupus familiaris<br>OX=9615 GN=TECTA PE=4 SV=1                                           | 0,20 | 0,20 | 143,40 | 1471824,2 | 1 | 1 | 0 | 2,09  | 2155 | 8407  |
| >tr E2RPJ0 E2RPJ0_CANLF B9 domain containing 1 OS=Canis lupus familiaris<br>OX=9615 GN=B9D1 PE=4 SV=2                                    | 0,33 | 0,33 | 125,60 | 1443655,7 | 1 | 1 | 0 | 6,82  | 337  | 3998  |
| >tr A0A5F4CS14 A0A5F4CS14_CANLF Guanylate cyclase OS=Canis lupus familiaris<br>OX=9615 GN=GUCY1A2 PE=3 SV=1                              | 0,89 | 0,89 | 143,50 | 1433965,6 | 1 | 1 | 0 | 1,03  | 773  | 1560  |
| >tr E2R6E0 E2R6E0_CANLF Lipocln_cytosolic_FA-bd_dom domain-containing protein<br>OS=Canis lupus familiaris OX=9615 GN=LCNL1 PE=3 SV=2    | 2,09 | 2,03 | 333,60 | 1425748,0 | 4 | 1 | 0 | 3,68  | 299  | 1932  |
| >tr F1PIZ1 F1PIZ1_CANLF Caspase recruitment domain family member 6<br>OS=Canis lupus familiaris OX=9615 GN=CARD6 PE=4 SV=3               | 1,04 | 1,04 | 134,10 | 1402703,6 | 1 | 1 | 0 | 0,65  | 1071 | 14260 |
| >tr J9PA59 J9PA59_CANLF Olfactory receptor OS=Canis lupus familiaris<br>OX=9615 GN=OR4D9D PE=3 SV=1                                      | 0,80 | 0,80 | 288,00 | 1391820,7 | 1 | 1 | 1 | 7,40  | 311  | 36467 |
| >tr J9NWY1 J9NWY1_CANLF Quinoid dihydropteridine reductase<br>OS=Canis lupus familiaris OX=9615 GN=QDPR PE=3 SV=2                        | 1,24 | 1,22 | 180,10 | 1388401,2 | 2 | 1 | 0 | 6,42  | 296  | 22710 |
| >tr E2R9H5 E2R9H5_CANLF Na(+)-dependent phosphate cotransporter 2B<br>OS=Canis lupus familiaris OX=9615 GN=SLC34A2 PE=3 SV=3             | 0,17 | 0,17 | 105,40 | 1378968,3 | 1 | 1 | 0 | 1,52  | 724  | 1185  |
| >sp Q8WNN6 SODC_CANLF Superoxide dismutase [Cu-Zn] OS=Canis lupus familiaris<br>OX=9615 GN=SOD1 PE=2 SV=1                                | 1,72 | 1,70 | 331,30 | 1369830,7 | 2 | 1 | 0 | 15,69 | 153  | 6     |
| >tr E2QUV3 E2QUV3_CANLF Alpha-2-HS-glycoprotein OS=Canis lupus familiaris<br>OX=9615 GN=AHSG PE=4 SV=2                                   | 1,70 | 1,70 | 431,30 | 1348281,7 | 1 | 1 | 0 | 8,49  | 365  | 20747 |
| >tr E2RL47 E2RL47_CANLF Protocadherin 17 OS=Canis lupus familiaris                                                                       | 0,76 | 0,76 | 140,20 | 1314294,0 | 1 | 1 | 0 | 0,87  | 1154 | 27313 |

OX=9615 GN=PCDH17 PE=4 SV=3

|                                                                                                                                             |      |      |        |           |   |   |   |       |      |       |
|---------------------------------------------------------------------------------------------------------------------------------------------|------|------|--------|-----------|---|---|---|-------|------|-------|
| >tr E2RG75 E2RG75_CANLF Inactive ribonuclease-like protein 9<br>OS=Canis lupus familiaris OX=9615 GN=RNASE9 PE=3 SV=2                       | 2,50 | 2,48 | 307,30 | 1290137,0 | 2 | 1 | 0 | 7,07  | 198  | 41734 |
| >tr A0A5F4CKD5 A0A5F4CKD5_CANLF Polypeptide N-acetylglactosaminyltransferase OS=Canis lupus familiaris<br>OX=9615 GN=GALNT6 PE=3 SV=1       | 1,67 | 1,65 | 308,40 | 1284833,2 | 2 | 1 | 0 | 4,97  | 644  | 1617  |
| >sp Q9GL25 ESPB1_CANLF Epididymal sperm-binding protein 1<br>OS=Canis lupus familiaris OX=9615 GN=ELSPBP1 PE=1 SV=1                         | 3,05 | 2,97 | 228,50 | 1270739,3 | 5 | 1 | 0 | 6,94  | 245  | 36    |
| >tr E2RG75 E2RG75_CANLF Inactive ribonuclease-like protein 9<br>OS=Canis lupus familiaris OX=9615 GN=RNASE9 PE=3 SV=2                       | 3,09 | 3,03 | 364,60 | 1247887,5 | 4 | 1 | 0 | 7,07  | 198  | 41734 |
| >tr F1P655 F1P655_CANLF Purinergic receptor P2Y13 OS=Canis lupus familiaris<br>OX=9615 GN=P2RY13 PE=3 SV=3                                  | 0,28 | 0,28 | 148,50 | 1221463,3 | 1 | 1 | 1 | 7,04  | 341  | 4337  |
| >tr J9NZ25 J9NZ25_CANLF Shortage in chiasmata 1 OS=Canis lupus familiaris<br>OX=9615 GN=SHOC1 PE=4 SV=2                                     | 0,13 | 0,13 | 146,60 | 1194939,3 | 1 | 1 | 1 | 2,52  | 1428 | 1783  |
| >tr A0A5F4CCD0 A0A5F4CCD0_CANLF Cysteine rich secretory protein 2<br>OS=Canis lupus familiaris OX=9615 GN=CRISP2 PE=3 SV=1                  | 5,06 | 3,70 | 502,40 | 1192008,1 | 2 | 2 | 1 | 16,40 | 311  | 11017 |
| >tr E2RSA6 E2RSA6_CANLF Catenin beta like 1 OS=Canis lupus familiaris<br>OX=9615 GN=CTNBL1 PE=4 SV=2                                        | 0,96 | 0,96 | 126,90 | 1179921,7 | 1 | 1 | 0 | 1,42  | 563  | 42500 |
| >tr J9P887 J9P887_CANLF Vascular endothelial zinc finger 1 OS=Canis lupus familiaris<br>OX=9615 GN=VEZF1 PE=4 SV=2                          | 0,10 | 0,08 | 133,90 | 1167339,4 | 2 | 2 | 2 | 3,37  | 504  | 1015  |
| >tr A0A5F4CNT7 A0A5F4CNT7_CANLF Phosphatidylinositol glycan anchor biosynthesis class G OS=Canis lupus familiaris OX=9615 GN=PIGG PE=4 SV=1 | 0,26 | 0,26 | 142,90 | 1159811,4 | 1 | 1 | 1 | 1,06  | 850  | 6631  |
| >tr A0A5F4C6B5 A0A5F4C6B5_CANLF Plastin 3 OS=Canis lupus familiaris<br>OX=9615 GN=PLS3 PE=4 SV=1                                            | 0,73 | 0,73 | 236,50 | 1137141,3 | 1 | 1 | 0 | 4,07  | 639  | 30730 |
| >tr F1PZI2 F1PZI2_CANLF RING-type E3 ubiquitin transferase<br>OS=Canis lupus familiaris OX=9615 GN=MIB2 PE=4 SV=3                           | 0,12 | 0,10 | 237,70 | 1135441,9 | 2 | 1 | 0 | 1,19  | 1005 | 7737  |
| >tr J9NS29 J9NS29_CANLF Cystatin domain-containing protein<br>OS=Canis lupus familiaris OX=9615 GN=LOC607874 PE=4 SV=2                      | 0,23 | 0,23 | 193,60 | 1127289,5 | 1 | 1 | 0 | 4,79  | 313  | 30016 |
| >tr A0A5F4CPK4 A0A5F4CPK4_CANLF Formin binding protein 1<br>OS=Canis lupus familiaris OX=9615 GN=FNBP1 PE=4 SV=1                            | 0,20 | 0,20 | 92,90  | 1126990,3 | 1 | 1 | 0 | 1,42  | 562  | 14071 |
| >tr A0A5F4DFY8 A0A5F4DFY8_CANLF Splicing factor 3b subunit 3<br>OS=Canis lupus familiaris OX=9615 GN=SF3B3 PE=4 SV=1                        | 0,21 | 0,21 | 257,30 | 1126487,9 | 1 | 1 | 1 | 1,94  | 1185 | 5042  |
| >tr J9NS29 J9NS29_CANLF Cystatin domain-containing protein<br>OS=Canis lupus familiaris OX=9615 GN=LOC607874 PE=4 SV=2                      | 2,22 | 2,22 | 255,00 | 1118240,4 | 1 | 1 | 0 | 4,79  | 313  | 30016 |
| >tr A0A5F4CDM1 A0A5F4CDM1_CANLF L-lactate dehydrogenase<br>OS=Canis lupus familiaris OX=9615 PE=3 SV=1                                      | 0,83 | 0,81 | 130,30 | 1099498,5 | 2 | 1 | 0 | 2,87  | 279  | 43073 |
| >tr A0A5F4CDI3 A0A5F4CDI3_CANLF Dynein axonemal intermediate chain 4<br>OS=Canis lupus familiaris OX=9615 GN=DNAI4 PE=4 SV=1                | 0,11 | 0,11 | 113,20 | 1082266,0 | 1 | 1 | 0 | 2,78  | 791  | 31982 |
| >tr F1PDB9 F1PDB9_CANLF Toll like receptor 4 OS=Canis lupus familiaris<br>OX=9615 GN=TLR4 PE=3 SV=2                                         | 0,77 | 0,78 | 66,90  | 1069260,0 | 1 | 1 | 0 | 0,96  | 833  | 36972 |
| >tr A0A5F4CZB6 A0A5F4CZB6_CANLF Acetyl-coenzyme A synthetase<br>OS=Canis lupus familiaris OX=9615 GN=ACSS1 PE=3 SV=1                        | 0,16 | 0,16 | 72,30  | 1064814,9 | 1 | 1 | 0 | 0,89  | 900  | 28765 |
| >tr A0A5F4CUJ1 A0A5F4CUJ1_CANLF Protein tyrosine phosphatase 4A2<br>OS=Canis lupus familiaris OX=9615 GN=PTP4A2 PE=4 SV=1                   | 0,26 | 0,26 | 148,00 | 1045484,0 | 1 | 1 | 0 | 9,86  | 142  | 9003  |

|                                                                                                                                                                         |      |      |        |           |   |   |   |       |      |       |
|-------------------------------------------------------------------------------------------------------------------------------------------------------------------------|------|------|--------|-----------|---|---|---|-------|------|-------|
| >tr J9P432 J9P432_CANLF Glutamine--fructose-6-phosphate transaminase (isomerizing)<br>OS=Canis lupus familiaris OX=9615 GN=GFPT1 PE=4 SV=2                              | 0,81 | 0,81 | 173,90 | 1035497,0 | 1 | 1 | 0 | 1,18  | 677  | 7191  |
| >tr J9NRX4 J9NRX4_CANLF Glutathione transferase OS=Canis lupus familiaris<br>OX=9615 GN=LOC481841 PE=3 SV=2                                                             | 2,84 | 2,84 | 390,80 | 967231,6  | 1 | 1 | 0 | 10,98 | 246  | 15581 |
| >tr A0A5F4C3Q4 A0A5F4C3Q4_CANLF Polypyrimidine tract binding protein 2<br>OS=Canis lupus familiaris OX=9615 GN=PTBP2 PE=4 SV=1                                          | 0,78 | 0,78 | 140,80 | 952806,8  | 1 | 1 | 0 | 2,25  | 356  | 10982 |
| >tr F1PNH7 F1PNH7_CANLF Cartilage intermediate layer protein 2<br>OS=Canis lupus familiaris OX=9615 GN=CILP2 PE=4 SV=3                                                  | 0,10 | 0,09 | 150,90 | 936344,1  | 1 | 1 | 0 | 6,27  | 303  | 1537  |
| >tr F1PZI2 F1PZI2_CANLF RING-type E3 ubiquitin transferase<br>OS=Canis lupus familiaris OX=9615 GN=MIB2 PE=4 SV=3                                                       | 0,80 | 0,78 | 209,30 | 928079,6  | 2 | 1 | 0 | 1,19  | 1005 | 7737  |
| >tr A0A5F4CS14 A0A5F4CS14_CANLF Guanylate cyclase OS=Canis lupus familiaris<br>OX=9615 GN=GUCY1A2 PE=3 SV=1                                                             | 0,48 | 0,46 | 97,60  | 904886,3  | 2 | 1 | 0 | 1,03  | 773  | 1560  |
| >tr E2RIN3 E2RIN3_CANLF Otoancorin OS=Canis lupus familiaris<br>OX=9615 GN=OTOA PE=3 SV=3                                                                               | 0,25 | 0,25 | 98,10  | 851351,4  | 1 | 1 | 0 | 0,70  | 1139 | 18241 |
| >sp Q9GL25 ESPB1_CANLF Epididymal sperm-binding protein 1<br>OS=Canis lupus familiaris OX=9615 GN=ELSPBP1 PE=1 SV=1                                                     | 2,75 | 2,69 | 213,70 | 798630,0  | 4 | 1 | 0 | 6,94  | 245  | 36    |
| >tr J9P366 J9P366_CANLF Ganglioside induced differentiation associated protein 2<br>OS=Canis lupus familiaris OX=9615 GN=GDAP2 PE=3 SV=2                                | 0,19 | 0,19 | 75,00  | 783748,4  | 1 | 1 | 0 | 7,44  | 497  | 9162  |
| >tr F6XVF5 F6XVF5_CANLF WD repeat domain 72 OS=Canis lupus familiaris<br>OX=9615 GN=WDR72 PE=4 SV=2                                                                     | 0,53 | 0,53 | 80,40  | 749247,3  | 1 | 1 | 0 | 0,75  | 1071 | 16644 |
| >tr A0A5F4BUE2 A0A5F4BUE2_CANLF SpoU_methylase domain-containing protein<br>OS=Canis lupus familiaris OX=9615 GN=TARBP1 PE=4 SV=1                                       | 1,15 | 1,15 | 143,70 | 699101,6  | 1 | 1 | 0 | 0,50  | 1602 | 2815  |
| >tr J9P2E5 J9P2E5_CANLF PPFIA binding protein 1 OS=Canis lupus familiaris<br>OX=9615 GN=PPFIBP1 PE=3 SV=2                                                               | 1,30 | 1,30 | 159,40 | 697082,8  | 1 | 1 | 0 | 1,39  | 1005 | 1621  |
| >tr E2R6E0 E2R6E0_CANLF Lipocln_cytosolic_FA-bd_dom domain-containing protein<br>OS=Canis lupus familiaris OX=9615 GN=LCNL1 PE=3 SV=2                                   | 1,94 | 1,90 | 281,50 | 683544,2  | 3 | 1 | 0 | 3,68  | 299  | 1932  |
| >tr E2QWJ0 E2QWJ0_CANLF Poly [ADP-ribose] polymerase<br>OS=Canis lupus familiaris OX=9615 GN=PARP4 PE=4 SV=3                                                            | 0,27 | 0,28 | 189,90 | 683312,6  | 1 | 1 | 0 | 2,01  | 1688 | 34837 |
| >tr A0A5F4CNW2 A0A5F4CNW2_CANLF Radical S-adenosyl methionine and<br>flavodoxin domain-containing protein 1 OS=Canis lupus familiaris<br>OX=9615 GN=LOC479708 PE=3 SV=1 | 0,13 | 0,14 | 57,00  | 680820,4  | 1 | 1 | 1 | 1,04  | 670  | 13683 |
| >tr A0A5F4C605 A0A5F4C605_CANLF Centrosomal protein 78<br>OS=Canis lupus familiaris OX=9615 GN=CEP78 PE=4 SV=1                                                          | 0,36 | 0,37 | 76,50  | 669064,1  | 1 | 1 | 0 | 0,87  | 686  | 7979  |
| >tr A0A5F4DK72 A0A5F4DK72_CANLF Nuclear factor 1 OS=Canis lupus familiaris<br>OX=9615 GN=NFIA PE=3 SV=1                                                                 | 0,21 | 0,21 | 97,20  | 661679,6  | 1 | 1 | 0 | 3,97  | 478  | 11874 |
| >tr F1PIZ1 F1PIZ1_CANLF Caspase recruitment domain family member 6<br>OS=Canis lupus familiaris OX=9615 GN=CARD6 PE=4 SV=3                                              | 0,76 | 0,75 | 86,00  | 645761,3  | 2 | 1 | 0 | 0,65  | 1071 | 14260 |
| >sp Q28894 WFDC2_CANLF WAP four-disulfide core domain protein 2<br>OS=Canis lupus familiaris OX=9615 GN=WFDC2 PE=2 SV=1                                                 | 0,98 | 0,96 | 109,00 | 612111,6  | 2 | 1 | 0 | 12,90 | 124  | 53    |
| >tr A0A5F4CLR5 A0A5F4CLR5_CANLF Ligand dependent nuclear receptor<br>corepressor like OS=Canis lupus familiaris OX=9615 GN=LCORL PE=4 SV=1                              | 0,10 | 0,09 | 53,80  | 602155,3  | 1 | 1 | 0 | 2,84  | 634  | 1650  |
| >tr A0A5F4D4V6 A0A5F4D4V6_CANLF Ankyrin repeat domain 52<br>OS=Canis lupus familiaris OX=9615 GN=ANKRD52 PE=4 SV=1                                                      | 0,36 | 0,36 | 135,50 | 595276,9  | 1 | 1 | 0 | 1,87  | 1067 | 6228  |
| >tr J9P4P2 J9P4P2_CANLF Cation-transporting ATPase OS=Canis lupus familiaris<br>OX=9615 GN=ATP13A3 PE=3 SV=1                                                            | 0,11 | 0,12 | 78,70  | 581572,2  | 1 | 1 | 0 | 1,43  | 1257 | 1873  |

|                                                                                                                                                |      |      |        |          |   |   |   |      |      |       |
|------------------------------------------------------------------------------------------------------------------------------------------------|------|------|--------|----------|---|---|---|------|------|-------|
| >tr A0A5F4DEU9 A0A5F4DEU9_CANLF Dehydrogenase/reductase 3<br>OS=Canis lupus familiaris OX=9615 GN=DHRS3 PE=3 SV=1                              | 0,10 | 0,10 | 38,40  | 573898,8 | 1 | 1 | 0 | 2,79 | 323  | 16256 |
| >tr F1PZB3 F1PZB3_CANLF PRAME nuclear receptor transcriptional regulator<br>OS=Canis lupus familiaris OX=9615 GN=PRAME PE=3 SV=2               | 1,08 | 1,08 | 72,20  | 565593,9 | 1 | 1 | 0 | 3,32 | 512  | 30492 |
| >tr A0A5F4CCJ1 A0A5F4CCJ1_CANLF Transmembrane protein 241<br>OS=Canis lupus familiaris OX=9615 GN=TMEM241 PE=4 SV=1                            | 0,16 | 0,16 | 202,90 | 558332,0 | 1 | 1 | 0 | 3,75 | 347  | 27419 |
| >tr E2RG75 E2RG75_CANLF Inactive ribonuclease-like protein 9<br>OS=Canis lupus familiaris OX=9615 GN=RNASE9 PE=3 SV=2                          | 1,32 | 1,31 | 172,50 | 532308,8 | 2 | 1 | 0 | 7,07 | 198  | 41734 |
| >tr F1PXA2 F1PXA2_CANLF Delta(24)-sterol reductase OS=Canis lupus familiaris<br>OX=9615 GN=DHCR24 PE=4 SV=2                                    | 0,11 | 0,11 | 95,10  | 528394,0 | 1 | 1 | 0 | 1,74 | 516  | 37097 |
| >tr F1PP49 F1PP49_CANLF Transmembrane protein 8B OS=Canis lupus familiaris<br>OX=9615 GN=TMEM8B PE=3 SV=3                                      | 0,97 | 0,97 | 62,00  | 528354,6 | 1 | 1 | 0 | 2,02 | 891  | 36725 |
| >sp Q8MJ44 KAPCA_CANLF cAMP-dependent protein kinase catalytic subunit alpha<br>OS=Canis lupus familiaris OX=9615 GN=PRKACA PE=1 SV=3          | 0,57 | 0,57 | 117,20 | 525580,8 | 1 | 1 | 0 | 4,86 | 350  | 405   |
| >tr A0A5F4BZ56 A0A5F4BZ56_CANLF Chymotrypsin-like elastase family member 1<br>OS=Canis lupus familiaris OX=9615 GN=CELA1 PE=4 SV=1             | 0,72 | 0,72 | 36,40  | 522309,6 | 1 | 1 | 0 | 2,15 | 372  | 21422 |
| >tr A0A5F4C6U7 A0A5F4C6U7_CANLF Early endosome antigen 1<br>OS=Canis lupus familiaris OX=9615 GN=EEA1 PE=4 SV=1                                | 0,95 | 0,95 | 109,90 | 513140,4 | 1 | 1 | 0 | 0,51 | 1369 | 15937 |
| >tr A0A5F4C3M5 A0A5F4C3M5_CANLF IQ motif containing GTPase activating<br>protein 2 OS=Canis lupus familiaris OX=9615 GN=IQGAP2 PE=4 SV=1       | 0,79 | 0,79 | 86,80  | 506931,0 | 1 | 1 | 0 | 0,51 | 1577 | 1056  |
| >tr A0A5F4CFB6 A0A5F4CFB6_CANLF Potassium voltage-gated channel interacting<br>protein 3 OS=Canis lupus familiaris OX=9615 GN=KCINP3 PE=3 SV=1 | 0,23 | 0,23 | 99,80  | 502610,4 | 1 | 1 | 0 | 1,84 | 708  | 2187  |
| >sp E2RDV1 TDRD7_CANLF Tudor domain-containing protein 7<br>OS=Canis lupus familiaris OX=9615 GN=TDRD7 PE=3 SV=1                               | 1,07 | 1,07 | 40,20  | 498533,8 | 1 | 1 | 0 | 0,71 | 1125 | 54    |
| >tr J9P748 J9P748_CANLF Bromodomain adjacent to zinc finger domain 1A<br>OS=Canis lupus familiaris OX=9615 GN=BAZ1A PE=4 SV=1                  | 0,13 | 0,13 | 110,70 | 489844,5 | 1 | 1 | 1 | 0,71 | 1557 | 10939 |
| >tr J9NXF6 J9NXF6_CANLF Pleckstrin homology and RhoGEF domain containing G5<br>OS=Canis lupus familiaris OX=9615 GN=PLEKHG5 PE=4 SV=1          | 0,12 | 0,12 | 110,30 | 487039,7 | 1 | 1 | 0 | 1,25 | 1043 | 9267  |
| >tr F1PY29 F1PY29_CANLF Olfactory receptor OS=Canis lupus familiaris<br>OX=9615 GN=OR6X1 PE=3 SV=3                                             | 0,51 | 0,51 | 99,50  | 486152,3 | 1 | 1 | 0 | 7,37 | 312  | 12603 |
| >tr F1PEZ5 F1PEZ5_CANLF Laminin subunit alpha 2 OS=Canis lupus familiaris<br>OX=9615 GN=LAMA2 PE=4 SV=3                                        | 0,39 | 0,39 | 35,20  | 481210,0 | 1 | 1 | 0 | 0,51 | 3112 | 8576  |
| >tr A0A5F4CCX4 A0A5F4CCX4_CANLF UHRF1 binding protein 1<br>OS=Canis lupus familiaris OX=9615 GN=UHRF1BP1 PE=4 SV=1                             | 0,60 | 0,60 | 88,10  | 467957,5 | 1 | 1 | 0 | 0,77 | 1430 | 4238  |
| >tr A0A5F4CCJ1 A0A5F4CCJ1_CANLF Transmembrane protein 241<br>OS=Canis lupus familiaris OX=9615 GN=TMEM241 PE=4 SV=1                            | 0,83 | 0,81 | 176,00 | 453167,6 | 2 | 1 | 0 | 3,75 | 347  | 27419 |
| >tr A0A5F4BVH6 A0A5F4BVH6_CANLF KIAA1549 OS=Canis lupus familiaris<br>OX=9615 GN=KIAA1549 PE=4 SV=1                                            | 0,18 | 0,18 | 201,10 | 450870,1 | 1 | 1 | 0 | 0,50 | 1793 | 5440  |
| >tr E2RR30 E2RR30_CANLF Fatty acid amide hydrolase OS=Canis lupus familiaris<br>OX=9615 GN=FAAH PE=3 SV=2                                      | 0,73 | 0,73 | 40,10  | 441460,9 | 1 | 1 | 0 | 1,38 | 579  | 1550  |
| >tr F1PHM8 F1PHM8_CANLF Hexosyltransferase OS=Canis lupus familiaris<br>OX=9615 GN=B3GNT4 PE=3 SV=2                                            | 0,25 | 0,25 | 58,70  | 433737,0 | 1 | 1 | 0 | 2,24 | 357  | 33620 |
| >tr E2RI00 E2RI00_CANLF Tetratricopeptide repeat domain 5<br>OS=Canis lupus familiaris OX=9615 GN=TTC5 PE=4 SV=2                               | 0,22 | 0,22 | 137,20 | 416505,0 | 1 | 1 | 0 | 4,56 | 439  | 12220 |
| >tr F1PPJ8 F1PPJ8_CANLF Hephaestin like 1 OS=Canis lupus familiaris                                                                            | 0,44 | 0,44 | 43,90  | 415660,3 | 1 | 1 | 0 | 1,33 | 1204 | 16608 |



OX=9615 GN=HEPHL1 PE=3 SV=3

|                                                                                                                                      |      |      |        |          |   |   |   |       |      |       |
|--------------------------------------------------------------------------------------------------------------------------------------|------|------|--------|----------|---|---|---|-------|------|-------|
| >tr F1Q1L4 F1Q1L4_CANLF Chromosome 6 C16orf89 homolog<br>OS=Canis lupus familiaris OX=9615 GN=C6H16orf89 PE=4 SV=2                   | 1,50 | 1,50 | 167,80 | 394147,4 | 1 | 1 | 0 | 3,49  | 373  | 20319 |
| >sp Q28895 NPC2_CANLF NPC intracellular cholesterol transporter 2<br>OS=Canis lupus familiaris OX=9615 GN=NPC2 PE=2 SV=1             | 2,78 | 2,74 | 288,10 | 394021,3 | 3 | 1 | 0 | 8,72  | 149  | 153   |
| >tr A0A5F4C8F3 A0A5F4C8F3_CANLF Ankyrin 1 OS=Canis lupus familiaris<br>OX=9615 GN=ANK1 PE=4 SV=1                                     | 0,95 | 0,95 | 85,50  | 380540,6 | 1 | 1 | 0 | 0,43  | 1860 | 11424 |
| >tr A0A5F4CKH6 A0A5F4CKH6_CANLF Reverse transcriptase domain-containing<br>protein OS=Canis lupus familiaris OX=9615 PE=4 SV=1       | 0,44 | 0,44 | 108,30 | 374501,3 | 1 | 1 | 0 | 0,80  | 1001 | 26258 |
| >tr E2RSH4 E2RSH4_CANLF Sushi domain containing 2 OS=Canis lupus familiaris<br>OX=9615 GN=SUSD2 PE=4 SV=3                            | 0,33 | 0,33 | 107,30 | 360226,2 | 1 | 1 | 0 | 1,76  | 795  | 4865  |
| >tr A0A5F4C8B1 A0A5F4C8B1_CANLF Glycine cleavage system P protein<br>OS=Canis lupus familiaris OX=9615 GN=GLDC PE=3 SV=1             | 0,18 | 0,18 | 190,20 | 359608,6 | 1 | 1 | 0 | 1,08  | 1023 | 10505 |
| >tr A0A5F4CPG8 A0A5F4CPG8_CANLF TM2 domain containing 3<br>OS=Canis lupus familiaris OX=9615 GN=TM2D3 PE=4 SV=1                      | 0,19 | 0,19 | 151,30 | 357374,8 | 1 | 1 | 1 | 7,73  | 220  | 4691  |
| >tr E2RPQ4 E2RPQ4_CANLF FAST kinase domains 3 (Fragment)<br>OS=Canis lupus familiaris OX=9615 GN=FASTKD3 PE=4 SV=3                   | 0,10 | 0,09 | 88,20  | 347444,8 | 1 | 1 | 1 | 2,54  | 590  | 17330 |
| >tr A0A5F4C296 A0A5F4C296_CANLF Valyl-tRNA synthetase<br>OS=Canis lupus familiaris OX=9615 GN=VAR51 PE=3 SV=1                        | 0,11 | 0,11 | 78,00  | 346450,8 | 1 | 1 | 0 | 0,61  | 1320 | 1432  |
| >tr A0A5F4C407 A0A5F4C407_CANLF V-type proton ATPase subunit a<br>OS=Canis lupus familiaris OX=9615 GN=ATP6V0A1 PE=3 SV=1            | 0,24 | 0,24 | 91,60  | 323166,1 | 1 | 1 | 0 | 0,82  | 857  | 4387  |
| >tr A0A5F4C1Y7 A0A5F4C1Y7_CANLF Anoctamin OS=Canis lupus familiaris<br>OX=9615 GN=ANO10 PE=3 SV=1                                    | 0,10 | 0,10 | 80,70  | 323166,1 | 1 | 1 | 0 | 1,09  | 644  | 19257 |
| >tr F1PUE6 F1PUE6_CANLF SUMO specific peptidase 1 OS=Canis lupus familiaris<br>OX=9615 GN=SENP1 PE=3 SV=2                            | 1,23 | 1,23 | 94,00  | 318375,9 | 1 | 1 | 0 | 1,01  | 690  | 7863  |
| >sp Q28894 WFDC2_CANLF WAP four-disulfide core domain protein 2<br>OS=Canis lupus familiaris OX=9615 GN=WFDC2 PE=2 SV=1              | 0,89 | 0,89 | 101,70 | 298881,1 | 1 | 1 | 0 | 12,90 | 124  | 53    |
| >tr A0A5F4CCJ1 A0A5F4CCJ1_CANLF Transmembrane protein 241<br>OS=Canis lupus familiaris OX=9615 GN=TMEM241 PE=4 SV=1                  | 0,72 | 0,72 | 202,80 | 293469,0 | 1 | 1 | 0 | 3,75  | 347  | 27419 |
| >tr A0A5F4CAX4 A0A5F4CAX4_CANLF Myeloid cell nuclear differentiation antigen<br>OS=Canis lupus familiaris OX=9615 GN=MNDA PE=4 SV=1  | 0,73 | 0,73 | 96,80  | 291913,1 | 1 | 1 | 0 | 2,02  | 397  | 2551  |
| >tr A0A5F4DH95 A0A5F4DH95_CANLF F-actin monooxygenase<br>OS=Canis lupus familiaris OX=9615 GN=MICAL1 PE=3 SV=1                       | 0,25 | 0,25 | 62,60  | 291417,0 | 1 | 1 | 0 | 1,57  | 1017 | 11153 |
| >tr J9P673 J9P673_CANLF Nicotinamide N-methyltransferase<br>OS=Canis lupus familiaris OX=9615 GN=NNMT PE=3 SV=1                      | 0,12 | 0,12 | 66,10  | 287425,1 | 1 | 1 | 0 | 7,95  | 264  | 25034 |
| >tr A0A5F4CLX5 A0A5F4CLX5_CANLF Nucleolar complex associated 4 homolog<br>OS=Canis lupus familiaris OX=9615 GN=NOC4L PE=3 SV=1       | 0,75 | 0,75 | 98,30  | 278863,1 | 1 | 1 | 0 | 1,38  | 581  | 12985 |
| >tr E2R9A2 E2R9A2_CANLF Coatomer subunit beta OS=Canis lupus familiaris<br>OX=9615 GN=COPB1 PE=4 SV=2                                | 0,38 | 0,38 | 80,70  | 278075,0 | 1 | 1 | 1 | 0,84  | 953  | 33386 |
| >tr A0A5F4D153 A0A5F4D153_CANLF Calcium/calmodulin-dependent protein kinase<br>OS=Canis lupus familiaris OX=9615 GN=CAMK2G PE=3 SV=1 | 0,12 | 0,12 | 89,40  | 270937,9 | 1 | 1 | 1 | 2,37  | 590  | 17859 |
| >tr A0A5F4D8W3 A0A5F4D8W3_CANLF Vitamin K-dependent protein S<br>OS=Canis lupus familiaris OX=9615 GN=PROS1 PE=4 SV=1                | 0,72 | 0,72 | 55,60  | 269246,9 | 1 | 1 | 0 | 1,58  | 505  | 1354  |
| >tr F1PIZ1 F1PIZ1_CANLF Caspase recruitment domain family member 6<br>OS=Canis lupus familiaris OX=9615 GN=CARD6 PE=4 SV=3           | 0,35 | 0,35 | 48,70  | 268603,6 | 1 | 1 | 0 | 0,65  | 1071 | 14260 |

|                                                                                                                                                                          |      |      |        |          |   |   |   |       |      |       |
|--------------------------------------------------------------------------------------------------------------------------------------------------------------------------|------|------|--------|----------|---|---|---|-------|------|-------|
| >tr A0A5F4DLD7 A0A5F4DLD7_CANLF Ig-like domain-containing protein<br>OS=Canis lupus familiaris OX=9615 GN=LOC484343 PE=4 SV=1                                            | 0,13 | 0,13 | 46,80  | 267285,9 | 1 | 1 | 0 | 3,39  | 443  | 36632 |
| >tr A0A5F4BQ43 A0A5F4BQ43_CANLF ATP binding cassette subfamily G member 5<br>OS=Canis lupus familiaris OX=9615 GN=ABCG5 PE=3 SV=1                                        | 0,12 | 0,12 | 50,40  | 249290,4 | 1 | 1 | 0 | 2,23  | 628  | 8651  |
| >tr F6XVF5 F6XVF5_CANLF WD repeat domain 72 OS=Canis lupus familiaris<br>OX=9615 GN=WDR72 PE=4 SV=2                                                                      | 0,52 | 0,53 | 59,90  | 246479,0 | 1 | 1 | 0 | 0,75  | 1071 | 16644 |
| >tr E2R3V4 E2R3V4_CANLF Transmembrane 4 L six family member 1<br>OS=Canis lupus familiaris OX=9615 GN=TM4SF1 PE=3 SV=3                                                   | 0,29 | 0,29 | 41,90  | 243827,9 | 1 | 1 | 0 | 16,24 | 117  | 14014 |
| >tr E2RCQ7 E2RCQ7_CANLF Serine peptidase inhibitor, Kunitz type 4<br>OS=Canis lupus familiaris OX=9615 GN=SPINT4 PE=4 SV=3                                               | 0,14 | 0,14 | 66,00  | 239976,0 | 1 | 1 | 0 | 10,20 | 98   | 11536 |
| >sp O18840 ACTB_CANLF Actin, cytoplasmic 1 OS=Canis lupus familiaris<br>OX=9615 GN=ACTB PE=2 SV=3                                                                        | 0,78 | 0,78 | 137,70 | 220413,7 | 1 | 1 | 0 | 4,80  | 375  | 642   |
| >tr Q9XSV4 Q9XSV4_CANLF CE10 protein OS=Canis lupus familiaris<br>OX=9615 GN=ce10 PE=2 SV=1                                                                              | 0,37 | 0,37 | 171,60 | 220323,8 | 1 | 1 | 0 | 10,00 | 110  | 41542 |
| >tr E2RCX8 E2RCX8_CANLF TEF transcription factor, PAR bZIP family member<br>OS=Canis lupus familiaris OX=9615 GN=TEF PE=3 SV=3                                           | 0,52 | 0,52 | 50,80  | 209626,8 | 1 | 1 | 1 | 6,09  | 345  | 22800 |
| >tr F1PP51 F1PP51_CANLF Phosphatidylinositol specific phospholipase C X domain<br>containing 2 OS=Canis lupus familiaris OX=9615 GN=PLCXD2 PE=4 SV=3                     | 0,11 | 0,11 | 66,70  | 197989,2 | 1 | 1 | 1 | 3,29  | 304  | 17707 |
| >tr F1PN88 F1PN88_CANLF Dynein axonemal heavy chain 17<br>OS=Canis lupus familiaris OX=9615 GN=DNAH17 PE=3 SV=3                                                          | 0,74 | 0,75 | 55,80  | 186978,3 | 1 | 1 | 0 | 0,20  | 4462 | 42143 |
| >tr F1Q2G6 F1Q2G6_CANLF Kelch like family member 10 OS=Canis lupus familiaris<br>OX=9615 GN=KLHL10 PE=4 SV=2                                                             | 0,80 | 0,80 | 63,00  | 161721,3 | 1 | 1 | 0 | 1,32  | 608  | 4666  |
| >tr A0A5F4C8I7 A0A5F4C8I7_CANLF Hydroxy-delta-5-steroid dehydrogenase, 3 beta-<br>and steroid delta-isomerase 7 OS=Canis lupus familiaris OX=9615 GN=HSD3B7 PE=3<br>SV=1 | 0,10 | 0,08 | 41,80  | 158946,8 | 1 | 1 | 1 | 8,16  | 196  | 19417 |
| >tr A0A5F4BXR1 A0A5F4BXR1_CANLF Proton-translocating NAD(P)(+)<br>transhydrogenase OS=Canis lupus familiaris OX=9615 GN=NNT PE=3 SV=1                                    | 0,76 | 0,76 | 111,40 | 152457,2 | 1 | 1 | 0 | 0,87  | 1029 | 17699 |
| >tr E2RCT1 E2RCT1_CANLF WAP domain-containing protein<br>OS=Canis lupus familiaris OX=9615 PE=4 SV=2                                                                     | 1,36 | 1,36 | 131,70 | 97579,4  | 1 | 1 | 0 | 13,79 | 116  | 21717 |
| >tr F1Q0F4 F1Q0F4_CANLF Peptidylprolyl isomerase OS=Canis lupus familiaris<br>OX=9615 GN=FKBP15 PE=4 SV=2                                                                | 0,15 | 0,15 | 107,00 | 91910,4  | 1 | 1 | 1 | 0,91  | 1204 | 4607  |
| >tr A0A5F4C8Y0 A0A5F4C8Y0_CANLF Tensin 2 OS=Canis lupus familiaris<br>OX=9615 GN=TNS2 PE=3 SV=1                                                                          | 0,13 | 0,13 | 65,00  | 84011,0  | 1 | 1 | 0 | 0,69  | 1306 | 12630 |
