# Supplementary material for: Proteome Profiling of Canine Epididymal Fluid: In Search of Protein Markers of Epididymal Sperm Motility
Source: MDPI journal article supplement (doi:10.3390/ijms241914790), 2023-09-30
Supplement: s1 [file s1]

**Supplementary Table S3.** Age and cauda epididymal sperm count of individual dogs (*Canis lupus familiaris*) used in the study, divided into two groups according to epididymal sperm progressive motility: good sperm motility (GSM) and poor sperm motility (PSM).

| Dog's number | Dog's age<br>[months] | Dog's cauda epididymal<br>sperm count<br>[ $\times 10^8$ spermatozoa/mL] |
|--------------|-----------------------|--------------------------------------------------------------------------|
| <b>GSM</b>   |                       |                                                                          |
| 1            | 18                    | 10.9                                                                     |
| 2            | 36                    | 5.6                                                                      |
| 5            | 12                    | 17.9                                                                     |
| 6            | 24                    | 12.0                                                                     |
| 10           | 36                    | 16.4                                                                     |
| 11           | 24                    | 14.3                                                                     |
| 13           | 42                    | 7.2                                                                      |
| 14           | 72                    | 15.5                                                                     |
| 15           | 72                    | 33.8                                                                     |
| 21           | 72                    | 11.2                                                                     |
| 23           | 120                   | 8.4                                                                      |
| 24           | 108                   | 17.1                                                                     |
| 25           | 132                   | 16.5                                                                     |
| Av.          | 59                    | 14.4                                                                     |
| <b>PSM</b>   |                       |                                                                          |
| 3            | 30                    | 9.3                                                                      |
| 4            | 24                    | 10.2                                                                     |
| 7            | 36                    | 15.2                                                                     |
| 8            | 24                    | 14.0                                                                     |
| 12           | 72                    | 4.5                                                                      |
| 16           | 60                    | 13.7                                                                     |
| 17           | 60                    | 15.8                                                                     |
| 22           | 84                    | 8.6                                                                      |
| 26           | 120                   | 16.6                                                                     |
| 28           | 84                    | 11.7                                                                     |
| Av.          | 59                    | 12.0                                                                     |
