# Supplementary material for: Proteome Profiling of Canine Epididymal Fluid: In Search of Protein Markers of Epididymal Sperm Motility
Source: MDPI journal article supplement (doi:10.3390/ijms241914790), 2023-09-30
Supplement: s1 [file s1]

**Supplementary Table S1.** Proteins of the cauda epididymal fluid of dogs (*Canis lupus familiaris*) with good sperm motility (GSM) evaluated by nanoUPLC-Q-TOF/MS.

| Description                                                                                                                | Log Prob | Best  Log Prob | Best score | Total Intensity | # of spectra | # of unique peptides | # of mod peptides | Coverage % | # AA's in protein | Protein DB number |
|----------------------------------------------------------------------------------------------------------------------------|----------|----------------|------------|-----------------|--------------|----------------------|-------------------|------------|-------------------|-------------------|
| >tr F1PR54 F1PR54_CANLF Lactotransferrin OS=Canis lupus familiaris<br>OX=9615 GN=LTF PE=3 SV=1                             | 126.64   | 9.12           | 722.90     | 1218684786.3    | 155          | 33                   | 3                 | 50.56      | 708               | 40436             |
| >tr F1PR54 F1PR54_CANLF Lactotransferrin OS=Canis lupus familiaris<br>OX=9615 GN=LTF PE=3 SV=1                             | 122.87   | 8.36           | 687.50     | 846941286.9     | 153          | 34                   | 6                 | 51.13      | 708               | 40436             |
| >tr F1PR54 F1PR54_CANLF Lactotransferrin OS=Canis lupus familiaris<br>OX=9615 GN=LTF PE=3 SV=1                             | 72.13    | 5.42           | 600.60     | 594782951.0     | 89           | 25                   | 1                 | 44.49      | 708               | 40436             |
| >tr F1PJ71 F1PJ71_CANLF Glutathione peroxidase OS=Canis lupus familiaris<br>OX=9615 GN=GPX5 PE=3 SV=2                      | 36.68    | 7.19           | 628.70     | 428551591.9     | 57           | 9                    | 1                 | 48.42      | 221               | 19009             |
| >tr E2RFZ4 E2RFZ4_CANLF Non-specific serine/threonine protein kinase<br>OS=Canis lupus familiaris OX=9615 GN=SLK PE=4 SV=1 | 0.14     | 0.03           | 165.70     | 326749944.8     | 17           | 1                    | 0                 | 0.40       | 1242              | 17002             |
| >sp Q9XS65 PTGDS_CANLF Prostaglandin-H2 D-isomerase<br>OS=Canis lupus familiaris OX=9615 GN=PTGDS PE=2 SV=1                | 18.01    | 5.62           | 614.50     | 280176370.2     | 28           | 6                    | 3                 | 47.12      | 191               | 165               |
| >tr F1PR54 F1PR54_CANLF Lactotransferrin OS=Canis lupus familiaris<br>OX=9615 GN=LTF PE=3 SV=1                             | 61.88    | 7.31           | 653.30     | 267776591.1     | 85           | 22                   | 4                 | 34.04      | 708               | 40436             |
| >sp P49822 ALBU_CANLF Albumin OS=Canis lupus familiaris<br>OX=9615 GN=ALB PE=1 SV=3                                        | 59.02    | 9.73           | 745.90     | 253959715.1     | 80           | 15                   | 2                 | 36.51      | 608               | 490               |
| >sp Q28895 NPC2_CANLF NPC intracellular cholesterol transporter 2<br>OS=Canis lupus familiaris OX=9615 GN=NPC2 PE=2 SV=1   | 24.71    | 11.54          | 811.40     | 234891576.8     | 37           | 4                    | 0                 | 38.25      | 149               | 153               |
| >sp Q659K0 CCNB3_CANLF G2/mitotic-specific cyclin-B3<br>OS=Canis lupus familiaris OX=9615 GN=CCNB3 PE=2 SV=1               | 1.59     | 1.30           | 121.30     | 223630232.6     | 17           | 1                    | 0                 | 0.38       | 1330              | 483               |
| >sp O18840 ACTB_CANLF Actin. cytoplasmic 1 OS=Canis lupus familiaris<br>OX=9615 GN=ACTB PE=2 SV=3                          | 16.24    | 4.37           | 415.30     | 204469348.1     | 24           | 8                    | 1                 | 20.53      | 375               | 642               |
| >sp Q9GL25 ESPB1_CANLF Epididymal sperm-binding protein 1<br>OS=Canis lupus familiaris OX=9615 GN=ELSPBP1 PE=1 SV=1        | 18.77    | 4.65           | 491.00     | 192341032.2     | 33           | 6                    | 2                 | 19.59      | 245               | 36                |
| >tr E2R7F4 E2R7F4_CANLF Olfactory receptor OS=Canis lupus familiaris<br>OX=9615 PE=3 SV=2                                  | 0.32     | 0.10           | 77.80      | 167871440.9     | 13           | 2                    | 0                 | 1.92       | 313               | 14455             |
| >tr F1PR54 F1PR54_CANLF Lactotransferrin OS=Canis lupus familiaris<br>OX=9615 GN=LTF PE=3 SV=1                             | 65.77    | 9.01           | 663.90     | 162287673.0     | 78           | 21                   | 3                 | 36.16      | 708               | 40436             |
| >tr F1PJ71 F1PJ71_CANLF Glutathione peroxidase OS=Canis lupus familiaris<br>OX=9615 GN=GPX5 PE=3 SV=2                      | 16.29    | 4.76           | 504.20     | 157929427.1     | 24           | 6                    | 0                 | 32.58      | 221               | 19009             |
| >tr F1PR54 F1PR54_CANLF Lactotransferrin OS=Canis lupus familiaris<br>OX=9615 GN=LTF PE=3 SV=1                             | 49.36    | 6.79           | 654.80     | 157029360.2     | 53           | 21                   | 5                 | 42.09      | 708               | 40436             |
| >tr J9P1P6 J9P1P6_CANLF Coiled-coil domain-containing protein 25<br>OS=Canis lupus familiaris OX=9615 PE=3 SV=2            | 1.05     | 0.65           | 125.00     | 155323538.9     | 21           | 1                    | 0                 | 1.71       | 292               | 12368             |
| >sp Q9XS65 PTGDS_CANLF Prostaglandin-H2 D-isomerase<br>OS=Canis lupus familiaris OX=9615 GN=PTGDS PE=2 SV=1                | 18.64    | 7.06           | 627.00     | 142743379.4     | 20           | 4                    | 3                 | 47.12      | 191               | 165               |
| >sp P49822 ALBU_CANLF Albumin OS=Canis lupus familiaris<br>OX=9615 GN=ALB PE=1 SV=3                                        | 8.20     | 4.36           | 385.80     | 124776196.6     | 13           | 3                    | 0                 | 6.91       | 608               | 490               |

|                                                                                                                                       |       |       |        |             |    |    |   |       |      |       |
|---------------------------------------------------------------------------------------------------------------------------------------|-------|-------|--------|-------------|----|----|---|-------|------|-------|
| >sp O18840 ACTB_CANLF Actin. cytoplasmic 1 OS=Canis lupus familiaris<br>OX=9615 GN=ACTB PE=2 SV=3                                     | 9.17  | 4.97  | 537.70 | 117644955.7 | 12 | 2  | 0 | 9.07  | 375  | 642   |
| >tr J9P1P6 J9P1P6_CANLF Coiled-coil domain-containing protein 25<br>OS=Canis lupus familiaris OX=9615 PE=3 SV=2                       | 1.89  | 1.47  | 113.30 | 112582603.4 | 22 | 1  | 0 | 1.71  | 292  | 12368 |
| >tr E2RCT1 E2RCT1_CANLF WAP domain-containing protein<br>OS=Canis lupus familiaris OX=9615 PE=4 SV=2                                  | 8.38  | 8.18  | 716.60 | 111314896.6 | 11 | 1  | 0 | 13.79 | 116  | 21717 |
| >sp Q28894 WFDC2_CANLF WAP four-disulfide core domain protein 2<br>OS=Canis lupus familiaris OX=9615 GN=WFDC2 PE=2 SV=1               | 10.65 | 5.32  | 550.00 | 107584263.2 | 15 | 4  | 2 | 45.16 | 124  | 53    |
| >tr A0A5F4C9S3 A0A5F4C9S3_CANLF Boule homolog. RNA binding protein<br>OS=Canis lupus familiaris OX=9615 GN=BOLL PE=4 SV=1             | 0.58  | 0.23  | 200.20 | 105145012.8 | 22 | 1  | 0 | 1.92  | 365  | 16536 |
| >sp O46607 GPX5_CANLF Epididymal secretory glutathione peroxidase<br>OS=Canis lupus familiaris OX=9615 GN=GPX5 PE=2 SV=1              | 8.94  | 3.80  | 359.00 | 104063830.5 | 12 | 3  | 0 | 11.31 | 221  | 564   |
| >tr F1PR54 F1PR54_CANLF Lactotransferrin OS=Canis lupus familiaris<br>OX=9615 GN=LTF PE=3 SV=1                                        | 37.18 | 9.06  | 708.60 | 100761850.1 | 49 | 13 | 1 | 19.49 | 708  | 40436 |
| >sp P49822 ALBU_CANLF Albumin OS=Canis lupus familiaris<br>OX=9615 GN=ALB PE=1 SV=3                                                   | 22.44 | 5.32  | 535.70 | 97451514.9  | 32 | 8  | 1 | 17.93 | 608  | 490   |
| >sp P25473 CLUS_CANLF Clusterin OS=Canis lupus familiaris<br>OX=9615 GN=CLU PE=2 SV=1                                                 | 13.06 | 4.53  | 483.50 | 96712175.0  | 14 | 4  | 0 | 10.56 | 445  | 725   |
| >tr F2Z4Q6 F2Z4Q6_CANLF Alpha fetoprotein OS=Canis lupus familiaris<br>OX=9615 GN=AFP PE=4 SV=2                                       | 53.95 | 11.46 | 848.50 | 93904365.5  | 85 | 10 | 0 | 27.32 | 637  | 24990 |
| >tr F1PR54 F1PR54_CANLF Lactotransferrin OS=Canis lupus familiaris<br>OX=9615 GN=LTF PE=3 SV=1                                        | 36.38 | 7.13  | 690.00 | 92477257.7  | 53 | 12 | 1 | 22.03 | 708  | 40436 |
| >sp P49822 ALBU_CANLF Albumin OS=Canis lupus familiaris<br>OX=9615 GN=ALB PE=1 SV=3                                                   | 13.13 | 4.58  | 458.60 | 92223673.6  | 13 | 3  | 0 | 7.89  | 608  | 490   |
| >sp Q6AW47 EST5A_CANLF Carboxylesterase 5A OS=Canis lupus familiaris<br>OX=9615 GN=CES5A PE=2 SV=1                                    | 11.67 | 5.16  | 536.20 | 89288745.7  | 21 | 3  | 0 | 8.35  | 575  | 629   |
| >sp Q9XS65 PTGDS_CANLF Prostaglandin-H2 D-isomerase<br>OS=Canis lupus familiaris OX=9615 GN=PTGDS PE=2 SV=1                           | 9.78  | 4.69  | 578.60 | 88406341.9  | 15 | 3  | 2 | 39.79 | 191  | 165   |
| >sp Q6AW47 EST5A_CANLF Carboxylesterase 5A OS=Canis lupus familiaris<br>OX=9615 GN=CES5A PE=2 SV=1                                    | 12.29 | 11.99 | 835.60 | 85610673.5  | 16 | 1  | 0 | 3.65  | 575  | 629   |
| >tr E2R6E0 E2R6E0_CANLF Lipocln_cytosolic_FA-bd_dom domain-containing<br>protein OS=Canis lupus familiaris OX=9615 GN=LCNL1 PE=3 SV=2 | 10.20 | 4.40  | 426.00 | 85200988.7  | 10 | 3  | 0 | 11.71 | 299  | 1932  |
| >sp Q659K0 CCNB3_CANLF G2/mitotic-specific cyclin-B3<br>OS=Canis lupus familiaris OX=9615 GN=CCNB3 PE=2 SV=1                          | 1.53  | 1.29  | 103.20 | 81340061.7  | 13 | 1  | 0 | 0.38  | 1330 | 483   |
| >sp O18840 ACTB_CANLF Actin. cytoplasmic 1 OS=Canis lupus familiaris<br>OX=9615 GN=ACTB PE=2 SV=3                                     | 8.98  | 4.76  | 409.90 | 79858615.0  | 13 | 3  | 0 | 11.47 | 375  | 642   |
| >sp Q659K0 CCNB3_CANLF G2/mitotic-specific cyclin-B3<br>OS=Canis lupus familiaris OX=9615 GN=CCNB3 PE=2 SV=1                          | 1.45  | 0.98  | 129.10 | 75541895.4  | 25 | 1  | 0 | 0.38  | 1330 | 483   |
| >tr J9P1P6 J9P1P6_CANLF Coiled-coil domain-containing protein 25<br>OS=Canis lupus familiaris OX=9615 PE=3 SV=2                       | 0.51  | 0.23  | 92.60  | 75164656.6  | 15 | 1  | 0 | 1.71  | 292  | 12368 |
| >sp P25473 CLUS_CANLF Clusterin OS=Canis lupus familiaris<br>OX=9615 GN=CLU PE=2 SV=1                                                 | 7.93  | 3.57  | 309.10 | 68311252.6  | 6  | 3  | 0 | 7.64  | 445  | 725   |
| >tr F1PR54 F1PR54_CANLF Lactotransferrin OS=Canis lupus familiaris<br>OX=9615 GN=LTF PE=3 SV=1                                        | 31.70 | 5.55  | 586.50 | 66958711.4  | 27 | 14 | 1 | 23.59 | 708  | 40436 |

|                                                                                                                                       |       |      |        |            |    |    |   |       |      |       |
|---------------------------------------------------------------------------------------------------------------------------------------|-------|------|--------|------------|----|----|---|-------|------|-------|
| >sp Q6AW47 EST5A_CANLF Carboxylesterase 5A OS=Canis lupus familiaris<br>OX=9615 GN=CES5A PE=2 SV=1                                    | 8.37  | 5.46 | 543.10 | 66848757.0 | 19 | 2  | 0 | 6.78  | 575  | 629   |
| >tr F2Z4Q6 F2Z4Q6_CANLF Alpha fetoprotein OS=Canis lupus familiaris<br>OX=9615 GN=AFP PE=4 SV=2                                       | 20.55 | 4.99 | 540.60 | 64892825.2 | 18 | 7  | 0 | 18.05 | 637  | 24990 |
| >tr F1PDT8 F1PDT8_CANLF WAP four-disulfide core domain protein 2<br>OS=Canis lupus familiaris OX=9615 GN=WFDC2 PE=4 SV=3              | 18.18 | 5.87 | 656.60 | 63954626.0 | 18 | 5  | 2 | 50.91 | 110  | 33116 |
| >sp Q28895 NPC2_CANLF NPC intracellular cholesterol transporter 2<br>OS=Canis lupus familiaris OX=9615 GN=NPC2 PE=2 SV=1              | 18.41 | 9.19 | 746.60 | 63147505.6 | 25 | 3  | 0 | 38.25 | 149  | 153   |
| >tr J9NVE0 J9NVE0_CANLF KRAB domain-containing protein<br>OS=Canis lupus familiaris OX=9615 GN=LOC606925 PE=4 SV=1                    | 0.12  | 0.06 | 112.50 | 63104415.6 | 4  | 1  | 0 | 4.08  | 147  | 3752  |
| >sp Q28895 NPC2_CANLF NPC intracellular cholesterol transporter 2<br>OS=Canis lupus familiaris OX=9615 GN=NPC2 PE=2 SV=1              | 13.58 | 7.54 | 703.80 | 61954617.2 | 17 | 3  | 0 | 36.24 | 149  | 153   |
| >sp Q9GL25 ESPB1_CANLF Epididymal sperm-binding protein 1<br>OS=Canis lupus familiaris OX=9615 GN=ELSPBP1 PE=1 SV=1                   | 6.92  | 3.89 | 373.00 | 60361363.3 | 24 | 3  | 1 | 10.20 | 245  | 36    |
| >sp Q6AW47 EST5A_CANLF Carboxylesterase 5A OS=Canis lupus familiaris<br>OX=9615 GN=CES5A PE=2 SV=1                                    | 5.80  | 5.39 | 546.60 | 58878724.1 | 17 | 2  | 0 | 5.74  | 575  | 629   |
| >tr F1PR54 F1PR54_CANLF Lactotransferrin OS=Canis lupus familiaris<br>OX=9615 GN=LTF PE=3 SV=1                                        | 28.82 | 4.76 | 582.90 | 56699211.5 | 37 | 12 | 1 | 22.18 | 708  | 40436 |
| >sp Q9XS65 PTGDS_CANLF Prostaglandin-H2 D-isomerase<br>OS=Canis lupus familiaris OX=9615 GN=PTGDS PE=2 SV=1                           | 4.31  | 3.95 | 351.40 | 56401279.5 | 5  | 2  | 1 | 18.32 | 191  | 165   |
| >tr F1PR54 F1PR54_CANLF Lactotransferrin OS=Canis lupus familiaris<br>OX=9615 GN=LTF PE=3 SV=1                                        | 57.94 | 7.46 | 665.70 | 56113940.3 | 70 | 24 | 0 | 41.10 | 708  | 40436 |
| >tr A0A5F4CCD0 A0A5F4CCD0_CANLF Cysteine rich secretory protein 2<br>OS=Canis lupus familiaris OX=9615 GN=CRISP2 PE=3 SV=1            | 9.32  | 4.64 | 490.10 | 54722108.5 | 14 | 4  | 2 | 15.76 | 311  | 11017 |
| >sp Q6AW47 EST5A_CANLF Carboxylesterase 5A OS=Canis lupus familiaris<br>OX=9615 GN=CES5A PE=2 SV=1                                    | 7.12  | 4.20 | 516.10 | 53058401.5 | 14 | 3  | 0 | 8.70  | 575  | 629   |
| >tr E2R6E0 E2R6E0_CANLF Lipocln_cytosolic_FA-bd_dom domain-containing<br>protein OS=Canis lupus familiaris OX=9615 GN=LCNL1 PE=3 SV=2 | 11.87 | 4.40 | 566.20 | 52536400.0 | 10 | 3  | 0 | 10.37 | 299  | 1932  |
| >tr F1PNV9 F1PNV9_CANLF Pecanex-like protein OS=Canis lupus familiaris<br>OX=9615 GN=PCNX4 PE=3 SV=3                                  | 0.10  | 0.06 | 114.40 | 52250931.3 | 2  | 1  | 0 | 0.52  | 1145 | 3914  |
| >sp Q9GL25 ESPB1_CANLF Epididymal sperm-binding protein 1<br>OS=Canis lupus familiaris OX=9615 GN=ELSPBP1 PE=1 SV=1                   | 8.15  | 4.59 | 352.20 | 49368920.4 | 11 | 2  | 0 | 10.20 | 245  | 36    |
| >sp O18840 ACTB_CANLF Actin. cytoplasmic 1 OS=Canis lupus familiaris<br>OX=9615 GN=ACTB PE=2 SV=3                                     | 7.85  | 3.86 | 473.90 | 48561650.3 | 11 | 2  | 0 | 9.07  | 375  | 642   |
| >sp P49822 ALBU_CANLF Albumin OS=Canis lupus familiaris<br>OX=9615 GN=ALB PE=1 SV=3                                                   | 10.83 | 4.81 | 575.30 | 48366778.3 | 15 | 4  | 2 | 7.24  | 608  | 490   |
| >sp P49822 ALBU_CANLF Albumin OS=Canis lupus familiaris<br>OX=9615 GN=ALB PE=1 SV=3                                                   | 9.24  | 4.60 | 425.40 | 48177765.3 | 7  | 2  | 0 | 4.93  | 608  | 490   |
| >sp Q28895 NPC2_CANLF NPC intracellular cholesterol transporter 2<br>OS=Canis lupus familiaris OX=9615 GN=NPC2 PE=2 SV=1              | 18.03 | 9.37 | 736.30 | 48117521.0 | 28 | 2  | 0 | 24.16 | 149  | 153   |
| >sp Q9XS65 PTGDS_CANLF Prostaglandin-H2 D-isomerase<br>OS=Canis lupus familiaris OX=9615 GN=PTGDS PE=2 SV=1                           | 8.37  | 5.45 | 558.30 | 48074312.6 | 14 | 3  | 2 | 23.56 | 191  | 165   |
| >sp Q9XS65 PTGDS_CANLF Prostaglandin-H2 D-isomerase<br>OS=Canis lupus familiaris OX=9615 GN=PTGDS PE=2 SV=1                           | 5.87  | 4.48 | 537.20 | 47908769.0 | 13 | 3  | 2 | 39.79 | 191  | 165   |

|                                                                                                                                   |       |      |        |            |    |   |   |       |      |       |
|-----------------------------------------------------------------------------------------------------------------------------------|-------|------|--------|------------|----|---|---|-------|------|-------|
| >sp Q9XS65 PTGDS_CANLF Prostaglandin-H2 D-isomerase<br>OS=Canis lupus familiaris OX=9615 GN=PTGDS PE=2 SV=1                       | 7.95  | 4.10 | 383.00 | 47598218.8 | 17 | 3 | 1 | 32.46 | 191  | 165   |
| >tr A0A5F4CLA9 A0A5F4CLA9_CANLF Kinesin family member 1A<br>OS=Canis lupus familiaris OX=9615 GN=KIF1A PE=3 SV=1                  | 2.68  | 1.32 | 205.50 | 45708942.1 | 5  | 3 | 0 | 1.18  | 1696 | 9452  |
| >tr F1PLT8 F1PLT8_CANLF Sulfhydryl oxidase OS=Canis lupus familiaris<br>OX=9615 GN=QSOX1 PE=3 SV=3                                | 4.86  | 4.70 | 544.70 | 44597401.6 | 9  | 1 | 0 | 2.46  | 568  | 33056 |
| >sp Q28895 NPC2_CANLF NPC intracellular cholesterol transporter 2<br>OS=Canis lupus familiaris OX=9615 GN=NPC2 PE=2 SV=1          | 9.41  | 9.23 | 731.70 | 43855473.4 | 10 | 1 | 0 | 15.44 | 149  | 153   |
| >tr A0A5F4CCD0 A0A5F4CCD0_CANLF Cysteine rich secretory protein 2<br>OS=Canis lupus familiaris OX=9615 GN=CRISP2 PE=3 SV=1        | 9.94  | 4.39 | 424.00 | 43574399.2 | 10 | 3 | 1 | 15.76 | 311  | 11017 |
| >tr J9P1P6 J9P1P6_CANLF Coiled-coil domain-containing protein 25<br>OS=Canis lupus familiaris OX=9615 PE=3 SV=2                   | 1.20  | 0.82 | 97.50  | 43567575.9 | 20 | 1 | 0 | 1.71  | 292  | 12368 |
| >tr F1PJ71 F1PJ71_CANLF Glutathione peroxidase OS=Canis lupus familiaris<br>OX=9615 GN=GPX5 PE=3 SV=2                             | 14.58 | 6.51 | 564.30 | 43549566.7 | 14 | 3 | 0 | 31.67 | 221  | 19009 |
| >tr F2Z4Q6 F2Z4Q6_CANLF Alpha fetoprotein OS=Canis lupus familiaris<br>OX=9615 GN=AFP PE=4 SV=2                                   | 21.50 | 4.83 | 547.00 | 43284986.2 | 13 | 5 | 0 | 13.34 | 637  | 24990 |
| >tr E2RCT1 E2RCT1_CANLF WAP domain-containing protein<br>OS=Canis lupus familiaris OX=9615 PE=4 SV=2                              | 7.95  | 7.81 | 582.00 | 40178535.6 | 8  | 1 | 0 | 13.79 | 116  | 21717 |
| >tr E2RG75 E2RG75_CANLF Inactive ribonuclease-like protein 9<br>OS=Canis lupus familiaris OX=9615 GN=RNASE9 PE=3 SV=2             | 12.54 | 4.13 | 336.80 | 39314867.0 | 8  | 4 | 0 | 37.88 | 198  | 41734 |
| >sp Q659K0 CCNB3_CANLF G2/mitotic-specific cyclin-B3<br>OS=Canis lupus familiaris OX=9615 GN=CCNB3 PE=2 SV=1                      | 0.67  | 0.43 | 127.90 | 38342036.2 | 13 | 1 | 0 | 0.38  | 1330 | 483   |
| >sp Q28895 NPC2_CANLF NPC intracellular cholesterol transporter 2<br>OS=Canis lupus familiaris OX=9615 GN=NPC2 PE=2 SV=1          | 7.94  | 7.84 | 603.20 | 36789423.5 | 6  | 1 | 0 | 15.44 | 149  | 153   |
| >sp Q6AW47 EST5A_CANLF Carboxylesterase 5A OS=Canis lupus familiaris<br>OX=9615 GN=CES5A PE=2 SV=1                                | 18.64 | 7.40 | 694.20 | 35054589.9 | 17 | 5 | 0 | 18.09 | 575  | 629   |
| >tr J9NS29 J9NS29_CANLF Cystatin domain-containing protein<br>OS=Canis lupus familiaris OX=9615 GN=LOC607874 PE=4 SV=2            | 4.21  | 4.11 | 419.90 | 34212574.4 | 6  | 1 | 0 | 4.79  | 313  | 30016 |
| >sp Q28895 NPC2_CANLF NPC intracellular cholesterol transporter 2<br>OS=Canis lupus familiaris OX=9615 GN=NPC2 PE=2 SV=1          | 9.44  | 9.16 | 694.30 | 33319827.3 | 15 | 1 | 0 | 15.44 | 149  | 153   |
| >tr F1PB68 F1PB68_CANLF Olfactomedin 4 OS=Canis lupus familiaris<br>OX=9615 GN=OLFM4 PE=4 SV=3                                    | 14.51 | 4.38 | 411.60 | 32524389.9 | 7  | 4 | 0 | 13.21 | 477  | 17246 |
| >tr A0A5F4CQU2 A0A5F4CQU2_CANLF Ig-like domain-containing protein<br>OS=Canis lupus familiaris OX=9615 GN=DLA-DMB PE=3 SV=1       | 0.11  | 0.11 | 107.40 | 32064177.3 | 1  | 1 | 0 | 4.10  | 244  | 18966 |
| >tr A0A5F4DFX7 A0A5F4DFX7_CANLF ATP binding cassette subfamily D<br>member 4 OS=Canis lupus familiaris OX=9615 GN=ABCD4 PE=4 SV=1 | 0.14  | 0.12 | 208.30 | 31860118.0 | 2  | 1 | 0 | 1.09  | 548  | 1012  |
| >tr E2RC57 E2RC57_CANLF Free fatty acid receptor 1 OS=Canis lupus<br>familiaris OX=9615 GN=FFAR3 PE=3 SV=2                        | 0.19  | 0.03 | 117.60 | 31658657.0 | 9  | 1 | 0 | 1.98  | 404  | 5262  |
| >tr E2RG75 E2RG75_CANLF Inactive ribonuclease-like protein 9<br>OS=Canis lupus familiaris OX=9615 GN=RNASE9 PE=3 SV=2             | 4.86  | 3.39 | 304.90 | 29939099.0 | 4  | 2 | 0 | 21.21 | 198  | 41734 |
| >tr F1PJ71 F1PJ71_CANLF Glutathione peroxidase OS=Canis lupus familiaris<br>OX=9615 GN=GPX5 PE=3 SV=2                             | 9.01  | 6.09 | 605.20 | 29099093.1 | 8  | 2 | 0 | 11.76 | 221  | 19009 |
| >tr J9NVE0 J9NVE0_CANLF KRAB domain-containing protein<br>OS=Canis lupus familiaris OX=9615 GN=LOC606925 PE=4 SV=1                | 0.10  | 0.01 | 128.10 | 29049938.3 | 6  | 1 | 0 | 4.08  | 147  | 3752  |

|                                                                                                                                       |       |      |        |            |    |   |   |       |      |       |
|---------------------------------------------------------------------------------------------------------------------------------------|-------|------|--------|------------|----|---|---|-------|------|-------|
| >tr J9NVE0 J9NVE0_CANLF KRAB domain-containing protein<br>OS=Canis lupus familiaris OX=9615 GN=LOC606925 PE=4 SV=1                    | 0.15  | 0.05 | 113.30 | 28768551.6 | 6  | 1 | 0 | 4.08  | 147  | 3752  |
| >tr A0A5F4C9S3 A0A5F4C9S3_CANLF Boule homolog. RNA binding protein<br>OS=Canis lupus familiaris OX=9615 GN=BOLL PE=4 SV=1             | 0.14  | 0.02 | 198.00 | 28373181.8 | 9  | 1 | 0 | 1.92  | 365  | 16536 |
| >tr F1PR54 F1PR54_CANLF Lactotransferrin OS=Canis lupus familiaris<br>OX=9615 GN=LTF PE=3 SV=1                                        | 24.29 | 8.93 | 656.20 | 28043851.0 | 36 | 7 | 1 | 14.97 | 708  | 40436 |
| >sp P49822 ALBU_CANLF Albumin OS=Canis lupus familiaris<br>OX=9615 GN=ALB PE=1 SV=3                                                   | 14.11 | 3.92 | 539.40 | 27820537.9 | 23 | 5 | 0 | 12.50 | 608  | 490   |
| >tr A0A5F4D2Z7 A0A5F4D2Z7_CANLF Peptidyl-prolyl cis-trans isomerase<br>OS=Canis lupus familiaris OX=9615 GN=CSNK1G1 PE=3 SV=1         | 4.08  | 3.97 | 253.10 | 27768145.1 | 4  | 2 | 0 | 9.89  | 273  | 35947 |
| >tr E2R6E0 E2R6E0_CANLF Lipocln cytosolic_FA-bd_dom domain-containing<br>protein OS=Canis lupus familiaris OX=9615 GN=LCNL1 PE=3 SV=2 | 10.57 | 3.80 | 502.60 | 27634392.7 | 17 | 3 | 0 | 10.37 | 299  | 1932  |
| >tr A0A5F4CLA9 A0A5F4CLA9_CANLF Kinesin family member 1A<br>OS=Canis lupus familiaris OX=9615 GN=KIF1A PE=3 SV=1                      | 0.55  | 0.32 | 200.20 | 26781914.9 | 6  | 2 | 0 | 0.94  | 1696 | 9452  |
| >tr E2RCT1 E2RCT1_CANLF WAP domain-containing protein<br>OS=Canis lupus familiaris OX=9615 PE=4 SV=2                                  | 6.45  | 6.35 | 533.20 | 26369383.5 | 6  | 1 | 0 | 13.79 | 116  | 21717 |
| >tr J9NWX1 J9NWX1_CANLF Quinoid dihydropteridine reductase<br>OS=Canis lupus familiaris OX=9615 GN=QDPR PE=3 SV=2                     | 2.20  | 2.16 | 224.30 | 25973475.3 | 3  | 1 | 0 | 6.42  | 296  | 22710 |
| >tr F1PF06 F1PF06_CANLF Sodium channel protein OS=Canis lupus familiaris<br>OX=9615 GN=SCN7A PE=3 SV=3                                | 0.10  | 0.04 | 101.60 | 25772355.2 | 3  | 1 | 0 | 0.36  | 1677 | 19116 |
| >tr J9NWX1 J9NWX1_CANLF Quinoid dihydropteridine reductase<br>OS=Canis lupus familiaris OX=9615 GN=QDPR PE=3 SV=2                     | 3.51  | 3.45 | 266.10 | 25066880.4 | 4  | 1 | 0 | 6.42  | 296  | 22710 |
| >tr J9NS29 J9NS29_CANLF Cystatin domain-containing protein<br>OS=Canis lupus familiaris OX=9615 GN=LOC607874 PE=4 SV=2                | 3.66  | 3.54 | 450.40 | 24807340.7 | 7  | 1 | 0 | 4.79  | 313  | 30016 |
| >tr J9NWX1 J9NWX1_CANLF Quinoid dihydropteridine reductase<br>OS=Canis lupus familiaris OX=9615 GN=QDPR PE=3 SV=2                     | 2.97  | 2.93 | 300.20 | 24779445.7 | 3  | 1 | 0 | 6.42  | 296  | 22710 |
| >tr F1PIZ1 F1PIZ1_CANLF Caspase recruitment domain family member 6<br>OS=Canis lupus familiaris OX=9615 GN=CARD6 PE=4 SV=3            | 1.39  | 1.25 | 173.50 | 24464975.7 | 8  | 1 | 0 | 0.65  | 1071 | 14260 |
| >tr F1PB68 F1PB68_CANLF Olfactomedin 4 OS=Canis lupus familiaris<br>OX=9615 GN=OLFM4 PE=4 SV=3                                        | 3.35  | 3.05 | 243.30 | 24207005.8 | 3  | 2 | 0 | 7.13  | 477  | 17246 |
| >tr A0A5F4C6B5 A0A5F4C6B5_CANLF Plastin 3 OS=Canis lupus familiaris<br>OX=9615 GN=PLS3 PE=4 SV=1                                      | 13.55 | 4.07 | 340.10 | 23828773.5 | 6  | 5 | 0 | 16.74 | 639  | 30730 |
| >tr F2Z4Q6 F2Z4Q6_CANLF Alpha fetoprotein OS=Canis lupus familiaris<br>OX=9615 GN=AFP PE=4 SV=2                                       | 5.67  | 3.73 | 525.40 | 23650252.7 | 8  | 2 | 1 | 4.24  | 637  | 24990 |
| >tr A0A5F4C9S3 A0A5F4C9S3_CANLF Boule homolog. RNA binding protein<br>OS=Canis lupus familiaris OX=9615 GN=BOLL PE=4 SV=1             | 0.11  | 0.02 | 202.70 | 23601704.8 | 7  | 1 | 0 | 1.92  | 365  | 16536 |
| >tr A0A5F4C687 A0A5F4C687_CANLF Bestrophin OS=Canis lupus familiaris<br>OX=9615 GN=BEST1 PE=3 SV=1                                    | 0.15  | 0.08 | 129.80 | 22950697.2 | 5  | 1 | 0 | 0.90  | 554  | 1320  |
| >tr A0A5F4DGF5 A0A5F4DGF5_CANLF Alkaline phosphatase<br>OS=Canis lupus familiaris OX=9615 GN=ALPL PE=3 SV=1                           | 4.00  | 3.90 | 350.90 | 22901259.6 | 6  | 1 | 0 | 1.92  | 572  | 6357  |
| >tr F1Q4J2 F1Q4J2_CANLF Carboxypeptidase A6 OS=Canis lupus familiaris<br>OX=9615 GN=CPA6 PE=3 SV=3                                    | 0.19  | 0.15 | 95.20  | 22300319.5 | 3  | 1 | 0 | 1.75  | 458  | 7546  |
| >tr E2RSI6 E2RSI6_CANLF Ezrin OS=Canis lupus familiaris<br>OX=9615 GN=EZR PE=4 SV=1                                                   | 2.70  | 2.36 | 259.70 | 22126974.4 | 5  | 2 | 0 | 4.27  | 586  | 15650 |

|                                                                                                                                    |       |      |        |            |    |    |   |       |      |       |
|------------------------------------------------------------------------------------------------------------------------------------|-------|------|--------|------------|----|----|---|-------|------|-------|
| >tr E2RPK8 E2RPK8_CANLF Phosphatidylethanolamine binding protein 4<br>OS=Canis lupus familiaris OX=9615 GN=PEBP4 PE=3 SV=2         | 6.64  | 4.71 | 532.70 | 21689019.2 | 3  | 2  | 0 | 12.96 | 247  | 4725  |
| >tr E2RFZ4 E2RFZ4_CANLF Non-specific serine/threonine protein kinase<br>OS=Canis lupus familiaris OX=9615 GN=SLK PE=4 SV=1         | 0.20  | 0.19 | 119.70 | 21372674.6 | 4  | 2  | 0 | 2.98  | 1242 | 17002 |
| >tr F1PDT8 F1PDT8_CANLF WAP four-disulfide core domain protein 2<br>OS=Canis lupus familiaris OX=9615 GN=WFDC2 PE=4 SV=3           | 3.69  | 3.67 | 357.20 | 21264309.3 | 2  | 1  | 0 | 29.09 | 110  | 33116 |
| >tr E2R838 E2R838_CANLF Intraflagellar transport 88 OS=Canis lupus familiaris OX=9615 GN=IFT88 PE=4 SV=2                           | 0.10  | 0.03 | 103.10 | 21185094.7 | 3  | 1  | 0 | 0.73  | 825  | 7901  |
| >sp P25473 CLUS_CANLF Clusterin OS=Canis lupus familiaris OX=9615 GN=CLU PE=2 SV=1                                                 | 6.26  | 3.63 | 351.00 | 20585729.1 | 5  | 3  | 0 | 7.64  | 445  | 725   |
| >tr A0A5F4DGF5 A0A5F4DGF5_CANLF Alkaline phosphatase<br>OS=Canis lupus familiaris OX=9615 GN=ALPL PE=3 SV=1                        | 7.31  | 4.37 | 477.80 | 20338059.9 | 6  | 2  | 0 | 4.37  | 572  | 6357  |
| >tr A0A5F4CI02 A0A5F4CI02_CANLF Solute carrier family 35 member F4<br>OS=Canis lupus familiaris OX=9615 GN=SLC35F4 PE=3 SV=1       | 0.25  | 0.23 | 128.00 | 19966156.6 | 2  | 1  | 0 | 2.29  | 480  | 7991  |
| >tr E2R6E0 E2R6E0_CANLF Lipocln_cytosolic_FA-bd_dom domain-containing protein OS=Canis lupus familiaris OX=9615 GN=LCNL1 PE=3 SV=2 | 4.48  | 3.15 | 410.30 | 19319897.6 | 4  | 2  | 0 | 6.69  | 299  | 1932  |
| >sp Q9XS65 PTGDS_CANLF Prostaglandin-H2 D-isomerase<br>OS=Canis lupus familiaris OX=9615 GN=PTGDS PE=2 SV=1                        | 3.99  | 1.68 | 276.00 | 18832900.1 | 10 | 5  | 3 | 47.12 | 191  | 165   |
| >tr A0A5F4DGF5 A0A5F4DGF5_CANLF Alkaline phosphatase<br>OS=Canis lupus familiaris OX=9615 GN=ALPL PE=3 SV=1                        | 4.74  | 4.60 | 471.90 | 18753180.9 | 8  | 1  | 0 | 1.92  | 572  | 6357  |
| >tr E2RH40 E2RH40_CANLF Cilia and flagella associated protein 69<br>OS=Canis lupus familiaris OX=9615 GN=CFAP69 PE=4 SV=2          | 0.10  | 0.05 | 47.10  | 18417172.3 | 3  | 1  | 0 | 0.53  | 941  | 3287  |
| >tr E2RSI6 E2RSI6_CANLF Ezrin OS=Canis lupus familiaris OX=9615 GN=EZR PE=4 SV=1                                                   | 1.32  | 1.26 | 212.50 | 18398388.4 | 4  | 1  | 0 | 2.90  | 586  | 15650 |
| >sp Q9XS65 PTGDS_CANLF Prostaglandin-H2 D-isomerase<br>OS=Canis lupus familiaris OX=9615 GN=PTGDS PE=2 SV=1                        | 5.60  | 4.00 | 440.80 | 18004374.4 | 16 | 3  | 1 | 32.46 | 191  | 165   |
| >sp O02812 MK14_CANLF Mitogen-activated protein kinase 14<br>OS=Canis lupus familiaris OX=9615 GN=MAPK14 PE=2 SV=3                 | 0.24  | 0.05 | 106.70 | 17937349.4 | 11 | 1  | 0 | 0.83  | 360  | 104   |
| >tr F2Z4Q6 F2Z4Q6_CANLF Alpha fetoprotein OS=Canis lupus familiaris OX=9615 GN=AFP PE=4 SV=2                                       | 19.31 | 3.41 | 446.00 | 17706367.3 | 26 | 10 | 0 | 21.82 | 637  | 24990 |
| >tr E2RPK8 E2RPK8_CANLF Phosphatidylethanolamine binding protein 4<br>OS=Canis lupus familiaris OX=9615 GN=PEBP4 PE=3 SV=2         | 4.86  | 3.61 | 448.20 | 17175961.6 | 4  | 2  | 0 | 12.15 | 247  | 4725  |
| >tr J9P3D0 J9P3D0_CANLF Solute carrier family 4 member 9<br>OS=Canis lupus familiaris OX=9615 GN=SLC4A9 PE=3 SV=2                  | 1.34  | 1.30 | 216.40 | 17136102.5 | 3  | 1  | 0 | 1.12  | 893  | 31921 |
| >tr E2RRW9 E2RRW9_CANLF Alpha-galactosidase OS=Canis lupus familiaris OX=9615 GN=NAGA PE=3 SV=2                                    | 0.10  | 0.07 | 63.10  | 17079596.2 | 2  | 1  | 1 | 7.06  | 411  | 9615  |
| >tr J9P1P6 J9P1P6_CANLF Coiled-coil domain-containing protein 25<br>OS=Canis lupus familiaris OX=9615 PE=3 SV=2                    | 0.91  | 0.73 | 103.20 | 16933519.8 | 10 | 1  | 0 | 1.71  | 292  | 12368 |
| >sp P63273 RS17_CANLF 40S ribosomal protein S17 OS=Canis lupus familiaris OX=9615 GN=RPS17 PE=2 SV=2                               | 0.11  | 0.03 | 99.90  | 16364382.5 | 5  | 1  | 0 | 3.70  | 135  | 277   |
| >tr A0A5F4D0R4 A0A5F4D0R4_CANLF RRM domain-containing protein<br>OS=Canis lupus familiaris OX=9615 GN=CPEB1 PE=3 SV=1              | 0.35  | 0.31 | 201.60 | 16008402.1 | 2  | 2  | 0 | 2.74  | 802  | 10637 |
| >tr J9NWWY1 J9NWWY1_CANLF Quinoid dihydropteridine reductase<br>OS=Canis lupus familiaris OX=9615 GN=QDPR PE=3 SV=2                | 3.52  | 3.44 | 360.40 | 15973260.8 | 5  | 1  | 0 | 6.42  | 296  | 22710 |

|                                                                                                                                                       |      |      |        |            |    |   |   |       |      |       |
|-------------------------------------------------------------------------------------------------------------------------------------------------------|------|------|--------|------------|----|---|---|-------|------|-------|
| >tr F1PUC4 F1PUC4_CANLF Olfactory receptor OS=Canis lupus familiaris<br>OX=9615 GN=OR51T1 PE=3 SV=3                                                   | 0.63 | 0.59 | 209.80 | 15552141.7 | 3  | 1 | 0 | 2.45  | 327  | 41557 |
| >sp O46607 GPX5_CANLF Epididymal secretory glutathione peroxidase<br>OS=Canis lupus familiaris OX=9615 GN=GPX5 PE=2 SV=1                              | 1.37 | 0.87 | 197.60 | 15539975.4 | 4  | 2 | 0 | 11.76 | 221  | 564   |
| >tr J9NS29 J9NS29_CANLF Cystatin domain-containing protein<br>OS=Canis lupus familiaris OX=9615 GN=LOC607874 PE=4 SV=2                                | 5.99 | 4.88 | 461.10 | 15223187.0 | 6  | 2 | 0 | 14.38 | 313  | 30016 |
| >sp Q28894 WFDC2_CANLF WAP four-disulfide core domain protein 2<br>OS=Canis lupus familiaris OX=9615 GN=WFDC2 PE=2 SV=1                               | 1.20 | 1.18 | 507.30 | 15031324.7 | 2  | 1 | 1 | 25.81 | 124  | 53    |
| >tr A0A5F4CCD0 A0A5F4CCD0_CANLF Cysteine rich secretory protein 2<br>OS=Canis lupus familiaris OX=9615 GN=CRISP2 PE=3 SV=1                            | 4.45 | 4.22 | 312.30 | 14786868.4 | 4  | 2 | 1 | 10.29 | 311  | 11017 |
| >sp O18840 ACTB_CANLF Actin. cytoplasmic 1 OS=Canis lupus familiaris<br>OX=9615 GN=ACTB PE=2 SV=3                                                     | 3.67 | 3.39 | 327.80 | 14757085.2 | 9  | 2 | 0 | 7.20  | 375  | 642   |
| >tr E2RCT1 E2RCT1_CANLF WAP domain-containing protein<br>OS=Canis lupus familiaris OX=9615 PE=4 SV=2                                                  | 5.87 | 5.79 | 548.00 | 14721975.2 | 5  | 1 | 0 | 13.79 | 116  | 21717 |
| >tr A0A5F4C9S3 A0A5F4C9S3_CANLF Boule homolog. RNA binding protein<br>OS=Canis lupus familiaris OX=9615 GN=BOLL PE=4 SV=1                             | 0.15 | 0.07 | 157.00 | 14716833.9 | 5  | 1 | 0 | 1.92  | 365  | 16536 |
| >tr E2R8Z9 E2R8Z9_CANLF Glutathione S-transferase C-terminal domain-<br>containing protein OS=Canis lupus familiaris OX=9615 GN=GSTCD PE=3<br>SV=1    | 1.47 | 1.39 | 353.60 | 14373247.2 | 5  | 1 | 0 | 3.66  | 629  | 6707  |
| >tr F1PC86 F1PC86_CANLF SR-related CTD associated factor 8<br>OS=Canis lupus familiaris OX=9615 GN=SCAF8 PE=4 SV=3                                    | 0.12 | 0.12 | 214.80 | 14141295.8 | 1  | 1 | 0 | 0.39  | 1282 | 12800 |
| >tr E2RQF9 E2RQF9_CANLF Minichromosome maintenance complex<br>component 3 associated protein OS=Canis lupus familiaris OX=9615<br>GN=MCM3AP PE=4 SV=3 | 0.73 | 0.63 | 310.20 | 14065856.1 | 6  | 1 | 0 | 0.25  | 1980 | 24083 |
| >tr A0A5F4D6X1 A0A5F4D6X1_CANLF Cysteine rich secretory protein 2<br>OS=Canis lupus familiaris OX=9615 GN=CRISP2 PE=3 SV=1                            | 2.54 | 2.48 | 507.90 | 13993639.8 | 4  | 1 | 1 | 5.30  | 321  | 3538  |
| >sp O46607 GPX5_CANLF Epididymal secretory glutathione peroxidase<br>OS=Canis lupus familiaris OX=9615 GN=GPX5 PE=2 SV=1                              | 2.52 | 2.42 | 400.70 | 13954578.7 | 6  | 1 | 0 | 6.79  | 221  | 564   |
| >tr F1PJ71 F1PJ71_CANLF Glutathione peroxidase OS=Canis lupus familiaris<br>OX=9615 GN=GPX5 PE=3 SV=2                                                 | 5.55 | 2.97 | 380.60 | 13930890.2 | 5  | 2 | 0 | 11.76 | 221  | 19009 |
| >sp O18840 ACTB_CANLF Actin. cytoplasmic 1 OS=Canis lupus familiaris<br>OX=9615 GN=ACTB PE=2 SV=3                                                     | 4.91 | 3.87 | 308.40 | 13399071.6 | 4  | 2 | 0 | 9.07  | 375  | 642   |
| >tr E2R819 E2R819_CANLF Ring finger protein 213 OS=Canis lupus familiaris<br>OX=9615 GN=RNF213 PE=4 SV=3                                              | 0.75 | 0.73 | 87.00  | 13339333.5 | 2  | 1 | 0 | 0.65  | 4454 | 14353 |
| >tr F1PR54 F1PR54_CANLF Lactotransferrin OS=Canis lupus familiaris<br>OX=9615 GN=LTF PE=3 SV=1                                                        | 8.04 | 2.57 | 431.00 | 13047678.1 | 17 | 5 | 0 | 13.98 | 708  | 40436 |
| >tr A0A5F4CX24 A0A5F4CX24_CANLF Essential for reactive oxygen species<br>protein OS=Canis lupus familiaris OX=9615 GN=CYBC1 PE=3 SV=1                 | 0.29 | 0.29 | 54.50  | 13009478.9 | 1  | 1 | 0 | 3.03  | 231  | 16149 |
| >tr A0A5F4CNT7 A0A5F4CNT7_CANLF Phosphatidylinositol glycan anchor<br>biosynthesis class G OS=Canis lupus familiaris OX=9615 GN=PIGG PE=4 SV=1        | 0.20 | 0.14 | 173.90 | 12764824.5 | 4  | 1 | 1 | 1.06  | 850  | 6631  |
| >tr E2RCK6 E2RCK6_CANLF Hyaluronidase OS=Canis lupus familiaris<br>OX=9615 GN=SPAM1 PE=3 SV=2                                                         | 8.78 | 4.31 | 482.00 | 12701239.0 | 6  | 3 | 0 | 13.31 | 541  | 3939  |
| >tr A0A5F4C6B5 A0A5F4C6B5_CANLF Plastin 3 OS=Canis lupus familiaris<br>OX=9615 GN=PLS3 PE=4 SV=1                                                      | 6.69 | 2.98 | 300.20 | 12651962.3 | 6  | 3 | 0 | 11.58 | 639  | 30730 |

|                                                                                                                                             |       |      |        |            |    |   |   |       |      |       |
|---------------------------------------------------------------------------------------------------------------------------------------------|-------|------|--------|------------|----|---|---|-------|------|-------|
| >tr J9NSQ1 J9NSQ1_CANLF Ig-like domain-containing protein<br>OS=Canis lupus familiaris OX=9615 PE=4 SV=2                                    | 4.30  | 3.91 | 352.90 | 12418811.9 | 7  | 2 | 0 | 29.17 | 120  | 9570  |
| >tr A0A5F4C2J2 A0A5F4C2J2_CANLF Alpha-mannosidase<br>OS=Canis lupus familiaris OX=9615 GN=MAN2B1 PE=3 SV=1                                  | 4.76  | 4.68 | 373.90 | 12267576.2 | 5  | 1 | 0 | 2.21  | 1042 | 3130  |
| >tr A0A5F4C6B5 A0A5F4C6B5_CANLF Plastin 3 OS=Canis lupus familiaris<br>OX=9615 GN=PLS3 PE=4 SV=1                                            | 4.61  | 2.69 | 390.10 | 12209620.1 | 5  | 2 | 0 | 5.95  | 639  | 30730 |
| >tr A0A5F4C2Y3 A0A5F4C2Y3_CANLF Carboxypeptidase X. M14 family<br>member 1 OS=Canis lupus familiaris OX=9615 GN=CPXM1 PE=3 SV=1             | 0.61  | 0.55 | 77.70  | 12178494.5 | 4  | 1 | 0 | 1.21  | 661  | 21027 |
| >tr A0A5F4C4P7 A0A5F4C4P7_CANLF G_PROTEIN_RECEP_F1_2 domain-<br>containing protein OS=Canis lupus familiaris OX=9615 PE=4 SV=1              | 0.73  | 0.73 | 102.10 | 12128979.2 | 1  | 1 | 0 | 3.24  | 309  | 30871 |
| >tr A0A5F4C739 A0A5F4C739_CANLF Rho guanine nucleotide exchange<br>factor 15 OS=Canis lupus familiaris OX=9615 GN=ARHGEF15 PE=4 SV=1        | 0.32  | 0.29 | 54.50  | 11800443.6 | 3  | 1 | 0 | 0.79  | 885  | 14702 |
| >tr A0A5F4CLA9 A0A5F4CLA9_CANLF Kinesin family member 1A<br>OS=Canis lupus familiaris OX=9615 GN=KIF1A PE=3 SV=1                            | 0.51  | 0.29 | 225.70 | 11560522.9 | 2  | 2 | 0 | 0.94  | 1696 | 9452  |
| >tr A0A5F4D8I6 A0A5F4D8I6_CANLF Phospholipase A2 receptor 1<br>OS=Canis lupus familiaris OX=9615 GN=PLA2R1 PE=4 SV=1                        | 0.12  | 0.10 | 164.80 | 11534982.4 | 3  | 2 | 1 | 0.50  | 1394 | 6796  |
| >tr F1PLT8 F1PLT8_CANLF Sulfhydryl oxidase OS=Canis lupus familiaris<br>OX=9615 GN=QSOX1 PE=3 SV=3                                          | 3.96  | 3.88 | 379.10 | 11399383.9 | 5  | 1 | 0 | 2.46  | 568  | 33056 |
| >tr F1PRL1 F1PRL1_CANLF Dppa2_A domain-containing protein<br>OS=Canis lupus familiaris OX=9615 PE=4 SV=2                                    | 0.12  | 0.02 | 52.40  | 11309431.9 | 6  | 1 | 0 | 2.79  | 179  | 17222 |
| >sp Q9XS65 PTGDS_CANLF Prostaglandin-H2 D-isomerase<br>OS=Canis lupus familiaris OX=9615 GN=PTGDS PE=2 SV=1                                 | 1.20  | 1.10 | 254.10 | 11294616.9 | 3  | 2 | 1 | 32.46 | 191  | 165   |
| >tr A0A5F4C6B5 A0A5F4C6B5_CANLF Plastin 3 OS=Canis lupus familiaris<br>OX=9615 GN=PLS3 PE=4 SV=1                                            | 5.62  | 3.74 | 575.20 | 11155603.6 | 7  | 2 | 0 | 9.39  | 639  | 30730 |
| >tr A0A5F4C6L3 A0A5F4C6L3_CANLF Cyclic nucleotide binding domain<br>containing 1 OS=Canis lupus familiaris OX=9615 GN=CNBD1 PE=4 SV=1       | 0.10  | 0.06 | 98.30  | 11131387.5 | 3  | 1 | 0 | 1.07  | 563  | 8180  |
| >tr A0A5F4D2Z7 A0A5F4D2Z7_CANLF Peptidyl-prolyl cis-trans isomerase<br>OS=Canis lupus familiaris OX=9615 GN=CSNK1G1 PE=3 SV=1               | 2.12  | 1.68 | 221.80 | 10857197.2 | 4  | 2 | 0 | 9.89  | 273  | 35947 |
| >tr Q5TJG5 Q5TJG5_CANLF MHC class II antigen DO alpha<br>OS=Canis lupus familiaris OX=9615 GN=DLA-DOA PE=3 SV=1                             | 0.49  | 0.47 | 151.70 | 10744635.5 | 2  | 1 | 0 | 4.00  | 250  | 41318 |
| >sp Q9XS65 PTGDS_CANLF Prostaglandin-H2 D-isomerase<br>OS=Canis lupus familiaris OX=9615 GN=PTGDS PE=2 SV=1                                 | 2.18  | 2.06 | 365.30 | 10719513.5 | 7  | 2 | 1 | 23.56 | 191  | 165   |
| >sp Q9GL25 ESPB1_CANLF Epididymal sperm-binding protein 1<br>OS=Canis lupus familiaris OX=9615 GN=ELSPBP1 PE=1 SV=1                         | 2.05  | 2.05 | 152.60 | 10607549.0 | 1  | 1 | 0 | 6.94  | 245  | 36    |
| >tr F6XSF4 F6XSF4_CANLF Shugoshin 1 OS=Canis lupus familiaris<br>OX=9615 GN=SGO1 PE=3 SV=2                                                  | 0.10  | 0.02 | 83.50  | 10337506.8 | 2  | 1 | 0 | 1.14  | 527  | 40477 |
| >tr A0A5F4C3M5 A0A5F4C3M5_CANLF IQ motif containing GTPase<br>activating protein 2 OS=Canis lupus familiaris OX=9615 GN=IQGAP2 PE=4<br>SV=1 | 0.77  | 0.61 | 117.30 | 10166444.1 | 9  | 1 | 0 | 0.51  | 1577 | 1056  |
| >tr A0A5F4D4B6 A0A5F4D4B6_CANLF Immunoglobulin superfamily member<br>8 OS=Canis lupus familiaris OX=9615 GN=IGSF8 PE=4 SV=1                 | 0.22  | 0.21 | 144.90 | 10123758.1 | 2  | 1 | 0 | 1.99  | 905  | 16467 |
| >tr Q9XSV4 Q9XSV4_CANLF CE10 protein OS=Canis lupus familiaris<br>OX=9615 GN=ce10 PE=2 SV=1                                                 | 1.97  | 1.93 | 178.80 | 10022413.4 | 3  | 1 | 0 | 9.09  | 110  | 41542 |
| >sp P49822 ALBU_CANLF Albumin OS=Canis lupus familiaris<br>OX=9615 GN=ALB PE=1 SV=3                                                         | 10.07 | 3.61 | 411.70 | 9863051.9  | 13 | 4 | 0 | 9.70  | 608  | 490   |



|                                                                                                                                        |      |      |        |           |    |   |   |       |      |       |
|----------------------------------------------------------------------------------------------------------------------------------------|------|------|--------|-----------|----|---|---|-------|------|-------|
| >tr A0A5F4C6L3 A0A5F4C6L3_CANLF Cyclic nucleotide binding domain containing 1 OS=Canis lupus familiaris OX=9615 GN=CNBD1 PE=4 SV=1     | 0.10 | 0.05 | 84.80  | 9825785.2 | 3  | 1 | 0 | 1.07  | 563  | 8180  |
| >tr F1PB68 F1PB68_CANLF Olfactomedin 4 OS=Canis lupus familiaris OX=9615 GN=OLFM4 PE=4 SV=3                                            | 4.54 | 3.21 | 375.40 | 9680575.6 | 3  | 2 | 0 | 7.55  | 477  | 17246 |
| >tr J9NS29 J9NS29_CANLF Cystatin domain-containing protein OS=Canis lupus familiaris OX=9615 GN=LOC607874 PE=4 SV=2                    | 3.61 | 3.59 | 299.40 | 9618285.7 | 2  | 1 | 0 | 4.79  | 313  | 30016 |
| >tr J9P1P6 J9P1P6_CANLF Coiled-coil domain-containing protein 25 OS=Canis lupus familiaris OX=9615 PE=3 SV=2                           | 0.48 | 0.24 | 70.40  | 9490796.3 | 13 | 1 | 0 | 1.71  | 292  | 12368 |
| >tr A0A5F4D4B6 A0A5F4D4B6_CANLF Immunoglobulin superfamily member 8 OS=Canis lupus familiaris OX=9615 GN=IGSF8 PE=4 SV=1               | 0.88 | 0.86 | 167.30 | 9320732.8 | 2  | 1 | 0 | 1.99  | 905  | 16467 |
| >sp Q6AW47 EST5A_CANLF Carboxylesterase 5A OS=Canis lupus familiaris OX=9615 GN=CES5A PE=2 SV=1                                        | 8.06 | 7.87 | 627.20 | 9277638.4 | 7  | 2 | 1 | 8.35  | 575  | 629   |
| >tr A0A5F4CKD5 A0A5F4CKD5_CANLF Polypeptide N-acetylgalactosaminyltransferase OS=Canis lupus familiaris OX=9615 GN=GALNT6 PE=3 SV=1    | 3.47 | 3.39 | 364.10 | 9235958.9 | 5  | 1 | 0 | 4.97  | 644  | 1617  |
| >tr J9PBB1 J9PBB1_CANLF Glutathione-independent PGD synthase OS=Canis lupus familiaris OX=9615 GN=PTGDS PE=3 SV=2                      | 6.76 | 3.94 | 416.80 | 9171796.5 | 11 | 3 | 1 | 21.55 | 181  | 8521  |
| >tr E2R6E0 E2R6E0_CANLF Lipocln_cytosolic_FA-bd_dom domain-containing protein OS=Canis lupus familiaris OX=9615 GN=LCNL1 PE=3 SV=2     | 2.84 | 2.82 | 291.90 | 9019710.2 | 2  | 1 | 0 | 3.01  | 299  | 1932  |
| >tr F6XVF5 F6XVF5_CANLF WD repeat domain 72 OS=Canis lupus familiaris OX=9615 GN=WDR72 PE=4 SV=2                                       | 0.75 | 0.73 | 118.90 | 9019664.3 | 2  | 1 | 0 | 0.75  | 1071 | 16644 |
| >tr J9NVM9 J9NVM9_CANLF Transporter OS=Canis lupus familiaris OX=9615 GN=SLC6A17 PE=3 SV=1                                             | 0.20 | 0.20 | 203.00 | 9005241.1 | 1  | 1 | 0 | 2.06  | 727  | 21199 |
| >sp P25473 CLUS_CANLF Clusterin OS=Canis lupus familiaris OX=9615 GN=CLU PE=2 SV=1                                                     | 3.26 | 1.99 | 269.80 | 8924448.6 | 6  | 3 | 0 | 7.64  | 445  | 725   |
| >tr F1PP44 F1PP44_CANLF Sterol regulatory element binding transcription factor 1 OS=Canis lupus familiaris OX=9615 GN=SREBF1 PE=4 SV=3 | 0.25 | 0.20 | 151.10 | 8820859.2 | 4  | 1 | 0 | 0.87  | 1147 | 16638 |
| >tr F1PIZ1 F1PIZ1_CANLF Caspase recruitment domain family member 6 OS=Canis lupus familiaris OX=9615 GN=CARD6 PE=4 SV=3                | 1.03 | 0.93 | 106.00 | 8750342.3 | 6  | 1 | 0 | 0.65  | 1071 | 14260 |
| >sp B6V8E6 CTNB1_CANLF Catenin beta-1 OS=Canis lupus familiaris OX=9615 GN=CTNNB1 PE=1 SV=1                                            | 1.30 | 1.30 | 138.60 | 8729708.8 | 1  | 1 | 0 | 0.51  | 781  | 442   |
| >tr F1PMC5 F1PMC5_CANLF Phosphatidylinositol 4-kinase alpha OS=Canis lupus familiaris OX=9615 GN=PI4KA PE=3 SV=3                       | 0.75 | 0.73 | 66.30  | 8610412.2 | 2  | 1 | 0 | 0.33  | 2101 | 27051 |
| >tr A0A5F4DGF5 A0A5F4DGF5_CANLF Alkaline phosphatase OS=Canis lupus familiaris OX=9615 GN=ALPL PE=3 SV=1                               | 1.70 | 1.64 | 270.80 | 8523199.0 | 4  | 1 | 0 | 1.92  | 572  | 6357  |
| >sp Q9GL25 ESPB1_CANLF Epididymal sperm-binding protein 1 OS=Canis lupus familiaris OX=9615 GN=ELSPBP1 PE=1 SV=1                       | 0.12 | 0.07 | 200.10 | 8504093.5 | 4  | 2 | 1 | 3.27  | 245  | 36    |
| >sp Q28259 G3P_CANLF Glyceraldehyde-3-phosphate dehydrogenase OS=Canis lupus familiaris OX=9615 GN=GAPDH PE=2 SV=3                     | 0.42 | 0.42 | 156.80 | 8480953.0 | 1  | 1 | 0 | 4.20  | 333  | 501   |
| >tr A0A5F4CYM0 A0A5F4CYM0_CANLF Quiescin sulfhydryl oxidase 2 OS=Canis lupus familiaris OX=9615 GN=QSOX2 PE=4 SV=1                     | 1.10 | 1.06 | 210.00 | 8083901.5 | 3  | 1 | 0 | 1.42  | 636  | 1464  |
| >sp Q28895 NPC2_CANLF NPC intracellular cholesterol transporter 2 OS=Canis lupus familiaris OX=9615 GN=NPC2 PE=2 SV=1                  | 8.12 | 4.78 | 492.10 | 7983135.5 | 4  | 2 | 0 | 24.16 | 149  | 153   |
| >tr E2R0D9 E2R0D9_CANLF Solute carrier family 17 member 2 OS=Canis lupus familiaris OX=9615 GN=SLC17A2 PE=4 SV=1                       | 0.31 | 0.31 | 142.60 | 7931457.5 | 1  | 1 | 0 | 2.51  | 478  | 30466 |

|                                                                                                                                                    |      |      |        |           |   |   |   |       |      |       |
|----------------------------------------------------------------------------------------------------------------------------------------------------|------|------|--------|-----------|---|---|---|-------|------|-------|
| >tr A0A5F4BNS5 A0A5F4BNS5_CANLF PPARG related coactivator 1<br>OS=Canis lupus familiaris OX=9615 GN=PPRC1 PE=4 SV=1                                | 0.13 | 0.13 | 161.10 | 7783008.2 | 1 | 1 | 1 | 2.80  | 1392 | 10740 |
| >tr A0A5F4DGF5 A0A5F4DGF5_CANLF Alkaline phosphatase<br>OS=Canis lupus familiaris OX=9615 GN=ALPL PE=3 SV=1                                        | 2.22 | 2.18 | 328.50 | 7655483.7 | 3 | 1 | 0 | 1.92  | 572  | 6357  |
| >tr A0A5F4DGF5 A0A5F4DGF5_CANLF Alkaline phosphatase<br>OS=Canis lupus familiaris OX=9615 GN=ALPL PE=3 SV=1                                        | 2.02 | 1.04 | 226.40 | 7583609.5 | 4 | 2 | 0 | 4.37  | 572  | 6357  |
| >tr E2RCT1 E2RCT1_CANLF WAP domain-containing protein<br>OS=Canis lupus familiaris OX=9615 PE=4 SV=2                                               | 5.54 | 5.46 | 532.70 | 7483646.1 | 5 | 1 | 0 | 13.79 | 116  | 21717 |
| >tr A0A5F4C3Q4 A0A5F4C3Q4_CANLF Polypyrimidine tract binding protein 2<br>OS=Canis lupus familiaris OX=9615 GN=PTBP2 PE=4 SV=1                     | 1.01 | 0.99 | 150.50 | 7379660.1 | 2 | 1 | 0 | 2.25  | 356  | 10982 |
| >tr F1PRT7 F1PRT7_CANLF Cation-transporting ATPase<br>OS=Canis lupus familiaris OX=9615 GN=ATP13A4 PE=3 SV=2                                       | 0.13 | 0.09 | 140.90 | 7289314.1 | 3 | 1 | 0 | 0.67  | 1197 | 1348  |
| >tr F1PHZ1 F1PHZ1_CANLF Plexin A2 OS=Canis lupus familiaris<br>OX=9615 GN=PLXNA2 PE=3 SV=3                                                         | 0.16 | 0.16 | 251.90 | 7286242.9 | 1 | 1 | 1 | 1.00  | 1906 | 44095 |
| >tr J9NS29 J9NS29_CANLF Cystatin domain-containing protein<br>OS=Canis lupus familiaris OX=9615 GN=LOC607874 PE=4 SV=2                             | 2.78 | 2.74 | 260.90 | 7214607.5 | 3 | 1 | 0 | 4.79  | 313  | 30016 |
| >sp B6V8E6 CTNB1_CANLF Catenin beta-1 OS=Canis lupus familiaris<br>OX=9615 GN=CTNNB1 PE=1 SV=1                                                     | 0.46 | 0.46 | 156.30 | 7147571.1 | 1 | 1 | 0 | 0.51  | 781  | 442   |
| >tr A0A5F4D3T4 A0A5F4D3T4_CANLF IQ motif containing GTPase activating<br>protein 1 OS=Canis lupus familiaris OX=9615 GN=IQGAP1 PE=4 SV=1           | 0.16 | 0.12 | 124.70 | 6877867.8 | 4 | 2 | 0 | 0.84  | 1548 | 4417  |
| >sp Q28895 NPC2_CANLF NPC intracellular cholesterol transporter 2<br>OS=Canis lupus familiaris OX=9615 GN=NPC2 PE=2 SV=1                           | 5.00 | 4.98 | 426.10 | 6873389.7 | 2 | 1 | 0 | 15.44 | 149  | 153   |
| >tr A0A5F4BNQ6 A0A5F4BNQ6_CANLF Ena/VASP-like protein<br>OS=Canis lupus familiaris OX=9615 GN=EVL PE=4 SV=1                                        | 0.32 | 0.33 | 257.60 | 6761642.3 | 1 | 1 | 1 | 1.55  | 837  | 17395 |
| >tr E2R8Z9 E2R8Z9_CANLF Glutathione S-transferase C-terminal domain-<br>containing protein OS=Canis lupus familiaris OX=9615 GN=GSTCD PE=3<br>SV=1 | 0.97 | 0.97 | 257.60 | 6532782.0 | 1 | 1 | 0 | 3.66  | 629  | 6707  |
| >tr F1PKE7 F1PKE7_CANLF C-type lectin domain containing 16A<br>OS=Canis lupus familiaris OX=9615 GN=CLEC16A PE=3 SV=3                              | 0.29 | 0.29 | 160.70 | 6532297.5 | 1 | 1 | 0 | 1.52  | 990  | 2034  |
| >tr F1PB68 F1PB68_CANLF Olfactomedin 4 OS=Canis lupus familiaris<br>OX=9615 GN=OLFM4 PE=4 SV=3                                                     | 1.48 | 1.18 | 170.20 | 6521989.0 | 2 | 2 | 0 | 6.92  | 477  | 17246 |
| >sp P31637 SC5A3_CANLF Sodium/myo-inositol cotransporter<br>OS=Canis lupus familiaris OX=9615 GN=SLC5A3 PE=2 SV=1                                  | 1.08 | 1.08 | 154.30 | 6358453.9 | 1 | 1 | 0 | 0.56  | 718  | 62    |
| >tr A0A5F4C6B5 A0A5F4C6B5_CANLF Plastin 3 OS=Canis lupus familiaris<br>OX=9615 GN=PLS3 PE=4 SV=1                                                   | 1.13 | 0.93 | 224.30 | 6330344.2 | 3 | 3 | 0 | 14.55 | 639  | 30730 |
| >tr J9NVE0 J9NVE0_CANLF KRAB domain-containing protein<br>OS=Canis lupus familiaris OX=9615 GN=LOC606925 PE=4 SV=1                                 | 0.10 | 0.06 | 112.00 | 6297681.1 | 2 | 1 | 0 | 4.08  | 147  | 3752  |
| >sp Q6AW47 EST5A_CANLF Carboxylesterase 5A OS=Canis lupus familiaris<br>OX=9615 GN=CES5A PE=2 SV=1                                                 | 6.99 | 3.53 | 413.20 | 6241052.4 | 4 | 2 | 0 | 6.78  | 575  | 629   |
| >tr F1PIZ1 F1PIZ1_CANLF Caspase recruitment domain family member 6<br>OS=Canis lupus familiaris OX=9615 GN=CARD6 PE=4 SV=3                         | 0.92 | 0.86 | 163.00 | 6092617.3 | 4 | 1 | 0 | 0.65  | 1071 | 14260 |
| >sp Q7YRU7 DSG3_CANLF Desmoglein-3 OS=Canis lupus familiaris<br>OX=9615 GN=DSG3 PE=2 SV=1                                                          | 0.10 | 0.08 | 61.70  | 6054166.9 | 1 | 1 | 0 | 2.32  | 993  | 508   |
| >tr A0A5F4CTN2 A0A5F4CTN2_CANLF Zinc finger CCHC domain-containing<br>protein 4 OS=Canis lupus familiaris OX=9615 GN=ZCCHC4 PE=3 SV=1              | 0.12 | 0.12 | 175.70 | 6020006.2 | 1 | 1 | 1 | 2.96  | 506  | 8047  |

|                                                                                                                                                                 |      |      |        |           |   |   |   |       |      |       |
|-----------------------------------------------------------------------------------------------------------------------------------------------------------------|------|------|--------|-----------|---|---|---|-------|------|-------|
| >tr F1PM28 F1PM28_CANLF Complex I subunit B13 OS=Canis lupus familiaris<br>OX=9615 PE=3 SV=3                                                                    | 0.75 | 0.73 | 90.10  | 5928330.2 | 2 | 1 | 0 | 8.64  | 81   | 3261  |
| >tr E2RF73 E2RF73_CANLF DNA helicase OS=Canis lupus familiaris<br>OX=9615 GN=MCM3 PE=3 SV=3                                                                     | 0.12 | 0.10 | 105.10 | 5387011.1 | 2 | 1 | 0 | 1.96  | 817  | 14486 |
| >tr A0A5F4D9S5 A0A5F4D9S5_CANLF Hyaluronoglucosaminidase<br>OS=Canis lupus familiaris OX=9615 GN=CEMIP PE=3 SV=1                                                | 0.44 | 0.44 | 152.00 | 5369280.1 | 1 | 1 | 0 | 0.24  | 1684 | 9775  |
| >sp O46607 GPX5_CANLF Epididymal secretory glutathione peroxidase<br>OS=Canis lupus familiaris OX=9615 GN=GPX5 PE=2 SV=1                                        | 1.43 | 1.37 | 263.00 | 5345706.2 | 4 | 1 | 0 | 6.79  | 221  | 564   |
| >tr F1PJ71 F1PJ71_CANLF Glutathione peroxidase OS=Canis lupus familiaris<br>OX=9615 GN=GPX5 PE=3 SV=2                                                           | 5.88 | 2.84 | 315.20 | 5260544.0 | 8 | 3 | 0 | 18.55 | 221  | 19009 |
| >sp Q05052 OST48_CANLF Dolichyl-diphosphooligosaccharide--protein<br>glycosyltransferase 48 kDa subunit OS=Canis lupus familiaris<br>OX=9615 GN=DDOST PE=1 SV=1 | 1.70 | 1.70 | 253.00 | 5232268.1 | 1 | 1 | 0 | 0.90  | 445  | 254   |
| >tr F1PE21 F1PE21_CANLF Tubulin alpha chain OS=Canis lupus familiaris<br>OX=9615 GN=LOC477570 PE=3 SV=2                                                         | 4.57 | 3.46 | 316.10 | 5218487.2 | 3 | 2 | 1 | 7.56  | 450  | 14589 |
| >sp Q6AW47 EST5A_CANLF Carboxylesterase 5A OS=Canis lupus familiaris<br>OX=9615 GN=CES5A PE=2 SV=1                                                              | 2.78 | 2.76 | 405.00 | 5212677.7 | 2 | 1 | 0 | 3.13  | 575  | 629   |
| >tr F1PEN8 F1PEN8_CANLF Carboxylic ester hydrolase<br>OS=Canis lupus familiaris OX=9615 GN=BCHE PE=3 SV=1                                                       | 0.11 | 0.09 | 139.70 | 5191221.4 | 2 | 1 | 0 | 1.33  | 602  | 4179  |
| >tr A0A5F4CKD5 A0A5F4CKD5_CANLF Polypeptide N-<br>acetylglactosaminyltransferase OS=Canis lupus familiaris<br>OX=9615 GN=GALNT6 PE=3 SV=1                       | 1.07 | 1.05 | 222.00 | 5155218.6 | 2 | 1 | 0 | 4.97  | 644  | 1617  |
| >sp Q6AW47 EST5A_CANLF Carboxylesterase 5A OS=Canis lupus familiaris<br>OX=9615 GN=CES5A PE=2 SV=1                                                              | 3.79 | 3.78 | 353.40 | 5083490.0 | 2 | 1 | 0 | 3.13  | 575  | 629   |
| >tr F1PKE7 F1PKE7_CANLF C-type lectin domain containing 16A<br>OS=Canis lupus familiaris OX=9615 GN=CLEC16A PE=3 SV=3                                           | 1.04 | 1.04 | 171.70 | 5076150.0 | 1 | 1 | 0 | 1.52  | 990  | 2034  |
| >tr F1PIZ1 F1PIZ1_CANLF Caspase recruitment domain family member 6<br>OS=Canis lupus familiaris OX=9615 GN=CARD6 PE=4 SV=3                                      | 0.10 | 0.08 | 61.10  | 5024515.0 | 2 | 1 | 0 | 0.65  | 1071 | 14260 |
| >tr F1PLT8 F1PLT8_CANLF Sulfhydryl oxidase OS=Canis lupus familiaris<br>OX=9615 GN=QSOX1 PE=3 SV=3                                                              | 1.75 | 1.75 | 246.90 | 4971443.1 | 1 | 1 | 0 | 1.76  | 568  | 33056 |
| >tr A0A5F4CKD5 A0A5F4CKD5_CANLF Polypeptide N-<br>acetylglactosaminyltransferase OS=Canis lupus familiaris<br>OX=9615 GN=GALNT6 PE=3 SV=1                       | 1.93 | 1.91 | 310.40 | 4825124.1 | 2 | 1 | 0 | 4.97  | 644  | 1617  |
| >tr A0A5F4BYH0 A0A5F4BYH0_CANLF Exportin 6 OS=Canis lupus<br>familiaris OX=9615 GN=XPO6 PE=3 SV=1                                                               | 0.28 | 0.28 | 45.30  | 4819807.6 | 1 | 1 | 0 | 1.77  | 1071 | 11957 |
| >tr A0A5F4D6X1 A0A5F4D6X1_CANLF Cysteine rich secretory protein 2<br>OS=Canis lupus familiaris OX=9615 GN=CRISP2 PE=3 SV=1                                      | 0.11 | 0.11 | 183.50 | 4795280.9 | 1 | 1 | 1 | 5.30  | 321  | 3538  |
| >sp P11615 ADA1B_CANLF Alpha-1B adrenergic receptor (Fragment)<br>OS=Canis lupus familiaris OX=9615 GN=ADRA1B PE=2 SV=1                                         | 0.10 | 0.05 | 153.50 | 4707576.7 | 1 | 1 | 0 | 2.40  | 417  | 676   |
| >tr F1PI87 F1PI87_CANLF Obg-like ATPase 1 OS=Canis lupus familiaris<br>OX=9615 GN=OLA1 PE=3 SV=3                                                                | 0.10 | 0.07 | 125.00 | 4608422.0 | 1 | 1 | 1 | 4.10  | 415  | 24107 |
| >sp P25291 GP2_CANLF Pancreatic secretory granule membrane major<br>glycoprotein GP2 OS=Canis lupus familiaris OX=9615 GN=GP2 PE=1 SV=1                         | 0.21 | 0.21 | 160.40 | 4570702.1 | 1 | 1 | 0 | 2.36  | 509  | 142   |
| >tr E2RPK8 E2RPK8_CANLF Phosphatidylethanolamine binding protein 4<br>OS=Canis lupus familiaris OX=9615 GN=PEBP4 PE=3 SV=2                                      | 4.31 | 4.25 | 464.70 | 4527926.9 | 4 | 1 | 0 | 8.91  | 247  | 4725  |

|                                                                                                                                      |      |      |        |           |   |   |   |       |      |       |
|--------------------------------------------------------------------------------------------------------------------------------------|------|------|--------|-----------|---|---|---|-------|------|-------|
| >tr A0A5F4BY35 A0A5F4BY35_CANLF Myosin IIIA OS=Canis lupus familiaris OX=9615 GN=MYO3A PE=3 SV=1                                     | 0.39 | 0.37 | 242.60 | 4472307.5 | 2 | 2 | 2 | 2.72  | 1473 | 18205 |
| >tr E2RR34 E2RR34_CANLF V-type proton ATPase subunit a OS=Canis lupus familiaris OX=9615 GN=ATP6V0A4 PE=3 SV=2                       | 0.25 | 0.24 | 90.10  | 4362840.4 | 2 | 1 | 0 | 2.86  | 839  | 21320 |
| >tr A0A5F4DGF5 A0A5F4DGF5_CANLF Alkaline phosphatase OS=Canis lupus familiaris OX=9615 GN=ALPL PE=3 SV=1                             | 1.11 | 1.09 | 183.60 | 4341403.1 | 2 | 1 | 0 | 1.92  | 572  | 6357  |
| >tr E2R0Z6 E2R0Z6_CANLF Juncophilin OS=Canis lupus familiaris OX=9615 GN=JPH1 PE=3 SV=1                                              | 0.17 | 0.12 | 129.90 | 4319466.1 | 4 | 1 | 0 | 1.06  | 662  | 32945 |
| >tr A0A5F4C6B5 A0A5F4C6B5_CANLF Plastin 3 OS=Canis lupus familiaris OX=9615 GN=PLS3 PE=4 SV=1                                        | 1.98 | 1.94 | 391.30 | 4292584.5 | 3 | 1 | 0 | 4.07  | 639  | 30730 |
| >tr E2REZ4 E2REZ4_CANLF Coiled-coil and C2 domain containing 2A OS=Canis lupus familiaris OX=9615 GN=CC2D2A PE=4 SV=3                | 0.22 | 0.22 | 298.60 | 4239053.6 | 1 | 1 | 0 | 0.76  | 1585 | 29419 |
| >tr E2RT80 E2RT80_CANLF ADP ribosylation factor GTPase activating protein 3 OS=Canis lupus familiaris OX=9615 GN=ARFGAP3 PE=4 SV=3   | 0.73 | 0.73 | 44.80  | 4168676.5 | 1 | 1 | 0 | 4.86  | 473  | 36754 |
| >sp P25473 CLUS_CANLF Clusterin OS=Canis lupus familiaris OX=9615 GN=CLU PE=2 SV=1                                                   | 2.15 | 2.15 | 278.00 | 4152171.9 | 1 | 1 | 1 | 4.49  | 445  | 725   |
| >tr E2RQC4 E2RQC4_CANLF WW domain-containing oxidoreductase OS=Canis lupus familiaris OX=9615 GN=WWOX PE=4 SV=3                      | 0.13 | 0.12 | 156.60 | 4125433.8 | 2 | 1 | 0 | 2.05  | 391  | 23035 |
| >sp Q7YRB7 AOFB_CANLF Amine oxidase [flavin-containing] B OS=Canis lupus familiaris OX=9615 GN=MAOB PE=2 SV=3                        | 0.14 | 0.12 | 114.40 | 4125433.8 | 2 | 1 | 0 | 1.54  | 520  | 646   |
| >tr J9P758 J9P758_CANLF Sorcin OS=Canis lupus familiaris OX=9615 GN=SRI PE=4 SV=2                                                    | 0.29 | 0.29 | 165.60 | 4008996.6 | 1 | 1 | 0 | 2.30  | 348  | 7242  |
| >sp P61162 ACTZ_CANLF Alpha-centractin OS=Canis lupus familiaris OX=9615 GN=ACTR1A PE=2 SV=1                                         | 0.71 | 0.71 | 103.70 | 4005625.4 | 1 | 1 | 0 | 5.59  | 376  | 693   |
| >sp Q8WNN6 SODC_CANLF Superoxide dismutase [Cu-Zn] OS=Canis lupus familiaris OX=9615 GN=SOD1 PE=2 SV=1                               | 0.83 | 0.83 | 250.10 | 3990437.1 | 1 | 1 | 0 | 23.53 | 153  | 6     |
| >tr A0A5F4CKD5 A0A5F4CKD5_CANLF Polypeptide N-acetylgalactosaminyltransferase OS=Canis lupus familiaris OX=9615 GN=GALNT6 PE=3 SV=1  | 2.71 | 2.69 | 342.60 | 3971920.7 | 2 | 1 | 0 | 4.97  | 644  | 1617  |
| >sp P25291 GP2_CANLF Pancreatic secretory granule membrane major glycoprotein GP2 OS=Canis lupus familiaris OX=9615 GN=GP2 PE=1 SV=1 | 0.28 | 0.28 | 162.10 | 3949608.5 | 1 | 1 | 0 | 2.36  | 509  | 142   |
| >tr F1PLV2 F1PLV2_CANLF Peptidyl-prolyl cis-trans isomerase OS=Canis lupus familiaris OX=9615 GN=CSNK1G1 PE=3 SV=3                   | 1.09 | 1.09 | 183.00 | 3904986.1 | 1 | 1 | 0 | 5.35  | 243  | 4290  |
| >sp Q9GL25 ESPB1_CANLF Epididymal sperm-binding protein 1 OS=Canis lupus familiaris OX=9615 GN=ELSPBP1 PE=1 SV=1                     | 0.10 | 0.05 | 161.20 | 3884693.1 | 2 | 1 | 0 | 3.27  | 245  | 36    |
| >tr A0A5F4CDM1 A0A5F4CDM1_CANLF L-lactate dehydrogenase OS=Canis lupus familiaris OX=9615 PE=3 SV=1                                  | 1.29 | 1.25 | 146.40 | 3883074.0 | 3 | 1 | 0 | 2.87  | 279  | 43073 |
| >tr F1PIZ1 F1PIZ1_CANLF Caspase recruitment domain family member 6 OS=Canis lupus familiaris OX=9615 GN=CARD6 PE=4 SV=3              | 1.27 | 1.23 | 134.70 | 3756557.7 | 3 | 1 | 0 | 0.65  | 1071 | 14260 |
| >tr A0A5F4BQ34 A0A5F4BQ34_CANLF Galectin-3-binding protein OS=Canis lupus familiaris OX=9615 GN=CANT1 PE=4 SV=1                      | 1.22 | 1.22 | 222.50 | 3755470.5 | 1 | 1 | 0 | 4.27  | 539  | 12448 |
| >tr A0A5F4C2Y3 A0A5F4C2Y3_CANLF Carboxypeptidase X. M14 family member 1 OS=Canis lupus familiaris OX=9615 GN=CPXM1 PE=3 SV=1         | 0.94 | 0.90 | 121.00 | 3671195.5 | 3 | 1 | 0 | 1.21  | 661  | 21027 |
| >tr E2RS75 E2RS75_CANLF C3/C5 convertase OS=Canis lupus familiaris OX=9615 GN=CFB PE=4 SV=2                                          | 0.57 | 0.53 | 109.00 | 3645960.3 | 3 | 1 | 0 | 0.85  | 823  | 1888  |

|                                                                                                                                                    |      |      |        |           |   |   |   |       |      |       |
|----------------------------------------------------------------------------------------------------------------------------------------------------|------|------|--------|-----------|---|---|---|-------|------|-------|
| >tr Q9XSV4 Q9XSV4_CANLF CE10 protein OS=Canis lupus familiaris<br>OX=9615 GN=ce10 PE=2 SV=1                                                        | 1.46 | 1.46 | 151.20 | 3617459.7 | 1 | 1 | 0 | 9.09  | 110  | 41542 |
| >tr F1PH13 F1PH13_CANLF Potassium channel tetramerization domain<br>containing 8 OS=Canis lupus familiaris OX=9615 GN=KCTD8 PE=4 SV=3              | 0.20 | 0.20 | 197.30 | 3591566.5 | 1 | 1 | 0 | 5.08  | 472  | 2616  |
| >tr E2REQ4 E2REQ4_CANLF NIPA like domain containing 3<br>OS=Canis lupus familiaris OX=9615 GN=NIPAL3 PE=3 SV=3                                     | 0.10 | 0.02 | 140.70 | 3561431.3 | 4 | 1 | 0 | 2.17  | 368  | 39451 |
| >tr A0A5F4DFY8 A0A5F4DFY8_CANLF Splicing factor 3b subunit 3<br>OS=Canis lupus familiaris OX=9615 GN=SF3B3 PE=4 SV=1                               | 0.31 | 0.31 | 179.40 | 3543830.3 | 1 | 1 | 0 | 0.93  | 1185 | 5042  |
| >sp O46607 GPX5_CANLF Epididymal secretory glutathione peroxidase<br>OS=Canis lupus familiaris OX=9615 GN=GPX5 PE=2 SV=1                           | 2.60 | 2.54 | 370.40 | 3504534.0 | 4 | 1 | 0 | 6.79  | 221  | 564   |
| >tr F1PB68 F1PB68_CANLF Olfactomedin 4 OS=Canis lupus familiaris<br>OX=9615 GN=OLFM4 PE=4 SV=3                                                     | 2.95 | 2.93 | 306.10 | 3486039.8 | 2 | 1 | 0 | 4.40  | 477  | 17246 |
| >tr F1Q4J2 F1Q4J2_CANLF Carboxypeptidase A6 OS=Canis lupus familiaris<br>OX=9615 GN=CPA6 PE=3 SV=3                                                 | 0.87 | 0.79 | 93.20  | 3431049.3 | 5 | 1 | 0 | 1.75  | 458  | 7546  |
| >tr F1PRT7 F1PRT7_CANLF Cation-transporting ATPase<br>OS=Canis lupus familiaris OX=9615 GN=ATP13A4 PE=3 SV=2                                       | 0.28 | 0.29 | 120.40 | 3396727.6 | 1 | 1 | 0 | 0.67  | 1197 | 1348  |
| >tr E2R269 E2R269_CANLF Ubiquitinyl hydrolase 1 OS=Canis lupus familiaris<br>OX=9615 GN=VCPIP1 PE=4 SV=1                                           | 2.05 | 2.05 | 198.00 | 3370842.9 | 1 | 1 | 0 | 1.39  | 1220 | 40849 |
| >tr A0A5F4DFI0 A0A5F4DFI0_CANLF Modulator of VRAC current 1<br>OS=Canis lupus familiaris OX=9615 GN=MLC1 PE=4 SV=1                                 | 0.22 | 0.22 | 149.90 | 3331619.3 | 1 | 1 | 0 | 1.10  | 724  | 31348 |
| >tr A0A5F4CX24 A0A5F4CX24_CANLF Essential for reactive oxygen species<br>protein OS=Canis lupus familiaris OX=9615 GN=CYBC1 PE=3 SV=1              | 0.22 | 0.22 | 82.50  | 3299520.3 | 1 | 1 | 0 | 3.03  | 231  | 16149 |
| >tr F6XVF5 F6XVF5_CANLF WD repeat domain 72 OS=Canis lupus familiaris<br>OX=9615 GN=WDR72 PE=4 SV=2                                                | 1.02 | 0.98 | 146.30 | 3234741.3 | 3 | 1 | 0 | 0.75  | 1071 | 16644 |
| >tr E2R5P5 E2R5P5_CANLF Calcyclin OS=Canis lupus familiaris<br>OX=9615 GN=S100A8 PE=4 SV=2                                                         | 0.10 | 0.08 | 193.70 | 3229992.8 | 2 | 1 | 0 | 14.66 | 191  | 27843 |
| >tr A0A5F4C3M5 A0A5F4C3M5_CANLF IQ motif containing GTPase<br>activating protein 2 OS=Canis lupus familiaris OX=9615 GN=IQGAP2 PE=4<br>SV=1        | 1.21 | 1.20 | 138.00 | 3212578.1 | 2 | 1 | 0 | 0.51  | 1577 | 1056  |
| >tr E2R8Z9 E2R8Z9_CANLF Glutathione S-transferase C-terminal domain-<br>containing protein OS=Canis lupus familiaris OX=9615 GN=GSTCD PE=3<br>SV=1 | 0.35 | 0.35 | 150.40 | 3208617.7 | 1 | 1 | 0 | 3.66  | 629  | 6707  |
| >sp O46607 GPX5_CANLF Epididymal secretory glutathione peroxidase<br>OS=Canis lupus familiaris OX=9615 GN=GPX5 PE=2 SV=1                           | 9.91 | 9.53 | 709.00 | 3166249.4 | 6 | 3 | 0 | 26.70 | 221  | 564   |
| >tr F1PIZ1 F1PIZ1_CANLF Caspase recruitment domain family member 6<br>OS=Canis lupus familiaris OX=9615 GN=CARD6 PE=4 SV=3                         | 0.50 | 0.48 | 132.30 | 3134967.7 | 2 | 1 | 0 | 0.65  | 1071 | 14260 |
| >tr F1PB68 F1PB68_CANLF Olfactomedin 4 OS=Canis lupus familiaris<br>OX=9615 GN=OLFM4 PE=4 SV=3                                                     | 4.93 | 2.49 | 273.90 | 3097096.9 | 4 | 2 | 0 | 7.55  | 477  | 17246 |
| >tr A0A5F4C840 A0A5F4C840_CANLF KIAA1109 OS=Canis lupus familiaris<br>OX=9615 GN=KIAA1109 PE=4 SV=1                                                | 0.29 | 0.29 | 167.70 | 3093149.0 | 1 | 1 | 0 | 0.34  | 5041 | 21640 |
| >tr A0A5F4C6B5 A0A5F4C6B5_CANLF Plastin 3 OS=Canis lupus familiaris<br>OX=9615 GN=PLS3 PE=4 SV=1                                                   | 1.26 | 1.24 | 247.50 | 3084067.1 | 2 | 2 | 0 | 6.26  | 639  | 30730 |
| >tr E2RFZ5 E2RFZ5_CANLF Cilia and flagella associated protein 61<br>OS=Canis lupus familiaris OX=9615 GN=CFAP61 PE=4 SV=1                          | 0.20 | 0.18 | 102.70 | 3078613.1 | 2 | 2 | 2 | 4.12  | 1237 | 12378 |

|                                                                                                                                       |      |      |        |           |   |   |   |       |      |       |
|---------------------------------------------------------------------------------------------------------------------------------------|------|------|--------|-----------|---|---|---|-------|------|-------|
| >tr F1Q407 F1Q407_CANLF Ventricular zone expressed PH domain containing 1 OS=Canis lupus familiaris OX=9615 GN=VEPH1 PE=3 SV=2        | 0.10 | 0.05 | 132.10 | 3061290.7 | 2 | 1 | 0 | 0.72  | 833  | 10639 |
| >tr F1PCE5 F1PCE5_CANLF Serpin family A member 1 OS=Canis lupus familiaris OX=9615 GN=SERPINA1 PE=3 SV=3                              | 2.31 | 1.26 | 232.60 | 3054966.1 | 2 | 2 | 0 | 8.79  | 421  | 8323  |
| >tr A0A5F4CX24 A0A5F4CX24_CANLF Essential for reactive oxygen species protein OS=Canis lupus familiaris OX=9615 GN=CYBC1 PE=3 SV=1    | 0.28 | 0.29 | 102.10 | 3044705.1 | 1 | 1 | 0 | 3.03  | 231  | 16149 |
| >tr E2R5P5 E2R5P5_CANLF Calcyclin OS=Canis lupus familiaris OX=9615 GN=S100A8 PE=4 SV=2                                               | 1.72 | 1.68 | 372.20 | 3036362.5 | 3 | 1 | 0 | 14.66 | 191  | 27843 |
| >tr A0A5F4C2J2 A0A5F4C2J2_CANLF Alpha-mannosidase OS=Canis lupus familiaris OX=9615 GN=MAN2B1 PE=3 SV=1                               | 2.51 | 2.49 | 231.20 | 3029024.0 | 2 | 1 | 0 | 2.21  | 1042 | 3130  |
| >tr J9NRX4 J9NRX4_CANLF Glutathione transferase OS=Canis lupus familiaris OX=9615 GN=LOC481841 PE=3 SV=2                              | 4.42 | 4.40 | 504.10 | 3025548.4 | 2 | 1 | 0 | 10.98 | 246  | 15581 |
| >tr A0A5F4C3Q4 A0A5F4C3Q4_CANLF Polypyrimidine tract binding protein 2 OS=Canis lupus familiaris OX=9615 GN=PTBP2 PE=4 SV=1           | 0.25 | 0.23 | 191.40 | 3025548.4 | 2 | 1 | 0 | 2.25  | 356  | 10982 |
| >tr Q5TJG5 Q5TJG5_CANLF MHC class II antigen DO alpha OS=Canis lupus familiaris OX=9615 GN=DLA-DOA PE=3 SV=1                          | 1.15 | 1.13 | 82.30  | 2971764.4 | 2 | 1 | 0 | 4.00  | 250  | 41318 |
| >sp P30804 ADCY6_CANLF Adenylate cyclase type 6 OS=Canis lupus familiaris OX=9615 GN=ADCY6 PE=1 SV=1                                  | 0.10 | 0.08 | 146.60 | 2962920.6 | 1 | 1 | 1 | 1.89  | 1165 | 641   |
| >tr A0A5F4C6B5 A0A5F4C6B5_CANLF Plastin 3 OS=Canis lupus familiaris OX=9615 GN=PLS3 PE=4 SV=1                                         | 0.94 | 0.49 | 269.60 | 2947256.0 | 3 | 2 | 0 | 9.39  | 639  | 30730 |
| >tr E2RAK5 E2RAK5_CANLF Sulfotransferase OS=Canis lupus familiaris OX=9615 GN=SULT1C3 PE=3 SV=1                                       | 0.13 | 0.09 | 152.90 | 2946696.1 | 3 | 1 | 0 | 2.30  | 304  | 12938 |
| >tr F6XSF4 F6XSF4_CANLF Shugoshin 1 OS=Canis lupus familiaris OX=9615 GN=SGO1 PE=3 SV=2                                               | 0.12 | 0.12 | 72.50  | 2909919.9 | 1 | 1 | 0 | 1.14  | 527  | 40477 |
| >sp Q5ECR9 CCR5_CANLF C-C chemokine receptor type 5 OS=Canis lupus familiaris OX=9615 GN=CCR5 PE=2 SV=1                               | 0.10 | 0.08 | 143.30 | 2885580.0 | 1 | 1 | 0 | 3.41  | 352  | 687   |
| >tr A0A5F4C3V3 A0A5F4C3V3_CANLF Olfactory receptor OS=Canis lupus familiaris OX=9615 GN=OR4C11I PE=3 SV=1                             | 0.55 | 0.55 | 47.40  | 2841254.4 | 1 | 1 | 0 | 4.81  | 312  | 9939  |
| >tr A0A5F4CKD5 A0A5F4CKD5_CANLF Polypeptide N-acetylgalactosaminyltransferase OS=Canis lupus familiaris OX=9615 GN=GALNT6 PE=3 SV=1   | 5.34 | 3.45 | 281.50 | 2836813.8 | 2 | 2 | 0 | 7.30  | 644  | 1617  |
| >tr A0A5F4C3M5 A0A5F4C3M5_CANLF IQ motif containing GTPase activating protein 2 OS=Canis lupus familiaris OX=9615 GN=IQGAP2 PE=4 SV=1 | 0.12 | 0.09 | 113.00 | 2830856.7 | 3 | 1 | 0 | 0.51  | 1577 | 1056  |
| >tr F1P6I0 F1P6I0_CANLF V-set immunoregulatory receptor OS=Canis lupus familiaris OX=9615 GN=VSIR PE=4 SV=3                           | 0.10 | 0.08 | 43.60  | 2805260.8 | 1 | 1 | 0 | 1.65  | 423  | 42941 |
| >tr E2RAK5 E2RAK5_CANLF Sulfotransferase OS=Canis lupus familiaris OX=9615 GN=SULT1C3 PE=3 SV=1                                       | 0.10 | 0.05 | 149.00 | 2770170.5 | 3 | 1 | 0 | 2.30  | 304  | 12938 |
| >tr F1PBG8 F1PBG8_CANLF DNA_MISMATCH_REPAIR_2 domain-containing protein OS=Canis lupus familiaris OX=9615 GN=MSH5 PE=3 SV=3           | 0.45 | 0.45 | 187.70 | 2760880.3 | 1 | 1 | 0 | 1.26  | 793  | 42812 |
| >tr J9NVE0 J9NVE0_CANLF KRAB domain-containing protein OS=Canis lupus familiaris OX=9615 GN=LOC606925 PE=4 SV=1                       | 0.11 | 0.09 | 88.20  | 2745429.5 | 2 | 1 | 0 | 4.08  | 147  | 3752  |
| >tr E2RDG6 E2RDG6_CANLF V(D)J recombination-activating protein 2 OS=Canis lupus familiaris OX=9615 GN=RAG2 PE=3 SV=1                  | 0.10 | 0.10 | 97.70  | 2745009.6 | 1 | 1 | 1 | 6.45  | 527  | 29372 |

|                                                                                                                                               |      |      |        |           |   |   |   |       |      |       |
|-----------------------------------------------------------------------------------------------------------------------------------------------|------|------|--------|-----------|---|---|---|-------|------|-------|
| >tr A0A5F4CPA9 A0A5F4CPA9_CANLF Bromodomain containing 4 OS=Canis lupus familiaris OX=9615 GN=BRD4 PE=4 SV=1                                  | 0.14 | 0.12 | 89.80  | 2733515.2 | 2 | 1 | 1 | 10.27 | 146  | 26797 |
| >tr E2RL61 E2RL61_CANLF Myomesin 3 OS=Canis lupus familiaris OX=9615 GN=MYOM3 PE=4 SV=2                                                       | 0.18 | 0.18 | 225.50 | 2720606.2 | 1 | 1 | 0 | 3.11  | 1449 | 15946 |
| >tr E2R0Z6 E2R0Z6_CANLF Junctophilin OS=Canis lupus familiaris OX=9615 GN=JPH1 PE=3 SV=1                                                      | 0.30 | 0.26 | 120.60 | 2715959.2 | 3 | 1 | 0 | 1.06  | 662  | 32945 |
| >tr A0A5F4C9S3 A0A5F4C9S3_CANLF Boule homolog. RNA binding protein OS=Canis lupus familiaris OX=9615 GN=BOLL PE=4 SV=1                        | 0.79 | 0.77 | 194.30 | 2710834.2 | 2 | 1 | 0 | 1.92  | 365  | 16536 |
| >tr A0A5F4C2Y3 A0A5F4C2Y3_CANLF Carboxypeptidase X. M14 family member 1 OS=Canis lupus familiaris OX=9615 GN=CPXM1 PE=3 SV=1                  | 0.33 | 0.31 | 98.60  | 2704153.1 | 2 | 1 | 0 | 1.21  | 661  | 21027 |
| >tr J9NZM4 J9NZM4_CANLF Ataxin-10 OS=Canis lupus familiaris OX=9615 GN=ATXN10 PE=3 SV=1                                                       | 0.45 | 0.45 | 115.80 | 2691060.1 | 1 | 1 | 0 | 1.89  | 475  | 1508  |
| >tr F1PGF7 F1PGF7_CANLF Acyltransferase OS=Canis lupus familiaris OX=9615 GN=AWAT1 PE=3 SV=2                                                  | 0.15 | 0.11 | 30.30  | 2688651.0 | 3 | 1 | 0 | 5.64  | 337  | 4210  |
| >tr J9P6S2 J9P6S2_CANLF Solute carrier family 12 member 4 OS=Canis lupus familiaris OX=9615 GN=SLC12A4 PE=3 SV=2                              | 0.24 | 0.22 | 62.80  | 2685987.2 | 2 | 1 | 0 | 0.66  | 1055 | 3880  |
| >tr E2RHS5 E2RHS5_CANLF tRNA (guanine-N(7)-)-methyltransferase non-catalytic subunit WDR4 OS=Canis lupus familiaris OX=9615 GN=WDR4 PE=3 SV=1 | 0.21 | 0.17 | 99.60  | 2652408.1 | 3 | 1 | 0 | 1.72  | 406  | 22738 |
| >sp Q28894 WFDC2_CANLF WAP four-disulfide core domain protein 2 OS=Canis lupus familiaris OX=9615 GN=WFDC2 PE=2 SV=1                          | 2.32 | 2.15 | 216.20 | 2623082.3 | 6 | 2 | 1 | 12.90 | 124  | 53    |
| >sp Q6AW47 EST5A_CANLF Carboxylesterase 5A OS=Canis lupus familiaris OX=9615 GN=CES5A PE=2 SV=1                                               | 3.73 | 2.76 | 391.10 | 2589539.7 | 4 | 2 | 0 | 6.78  | 575  | 629   |
| >tr A0A5F4D4B6 A0A5F4D4B6_CANLF Immunoglobulin superfamily member 8 OS=Canis lupus familiaris OX=9615 GN=IGSF8 PE=4 SV=1                      | 1.30 | 1.28 | 184.40 | 2566159.8 | 2 | 1 | 0 | 1.99  | 905  | 16467 |
| >tr A0A5F4C3Z0 A0A5F4C3Z0_CANLF Metaxin 2 OS=Canis lupus familiaris OX=9615 GN=MTX2 PE=3 SV=1                                                 | 0.86 | 0.87 | 279.40 | 2522383.9 | 1 | 1 | 0 | 16.10 | 267  | 14491 |
| >tr E2R6E0 E2R6E0_CANLF Lipocln_cytosolic_FA-bd_dom domain-containing protein OS=Canis lupus familiaris OX=9615 GN=LCNL1 PE=3 SV=2            | 4.18 | 4.04 | 438.20 | 2516704.3 | 8 | 1 | 0 | 3.68  | 299  | 1932  |
| >tr F2Z4Q6 F2Z4Q6_CANLF Alpha fetoprotein OS=Canis lupus familiaris OX=9615 GN=AFP PE=4 SV=2                                                  | 1.34 | 1.34 | 210.60 | 2500545.4 | 1 | 1 | 0 | 2.04  | 637  | 24990 |
| >tr A0A5F4CDJ1 A0A5F4CDJ1_CANLF Transforming growth factor beta receptor 3 OS=Canis lupus familiaris OX=9615 GN=TGFB3 PE=4 SV=1               | 0.73 | 0.73 | 69.20  | 2484850.5 | 1 | 1 | 0 | 0.91  | 770  | 10452 |
| >tr F1PLT8 F1PLT8_CANLF Sulfhydryl oxidase OS=Canis lupus familiaris OX=9615 GN=QSOX1 PE=3 SV=3                                               | 4.25 | 4.23 | 402.50 | 2478425.1 | 2 | 1 | 0 | 3.35  | 568  | 33056 |
| >tr J9P434 J9P434_CANLF Myotubularin related protein 14 OS=Canis lupus familiaris OX=9615 GN=MTMR14 PE=4 SV=2                                 | 0.39 | 0.37 | 122.60 | 2466216.2 | 2 | 1 | 0 | 1.51  | 596  | 17413 |
| >tr A0A5F4C6B5 A0A5F4C6B5_CANLF Plastin 3 OS=Canis lupus familiaris OX=9615 GN=PLS3 PE=4 SV=1                                                 | 1.11 | 0.94 | 176.10 | 2429891.2 | 2 | 2 | 0 | 9.39  | 639  | 30730 |
| >tr J9P9J4 J9P9J4_CANLF Aldehyde dehydrogenase 1 family member A1 OS=Canis lupus familiaris OX=9615 GN=ALDH1A1 PE=3 SV=1                      | 3.57 | 3.57 | 379.70 | 2410549.9 | 1 | 1 | 0 | 2.69  | 484  | 13765 |
| >tr J9NT93 J9NT93_CANLF SCP domain-containing protein OS=Canis lupus familiaris OX=9615 PE=3 SV=2                                             | 0.19 | 0.17 | 149.60 | 2373504.0 | 2 | 1 | 0 | 15.26 | 190  | 43704 |
| >tr F1PRL1 F1PRL1_CANLF Dppa2_A domain-containing protein OS=Canis lupus familiaris OX=9615 PE=4 SV=2                                         | 0.10 | 0.02 | 56.80  | 2349058.8 | 4 | 1 | 0 | 2.79  | 179  | 17222 |

|                                                                                                                                            |      |      |        |           |   |   |   |       |      |       |
|--------------------------------------------------------------------------------------------------------------------------------------------|------|------|--------|-----------|---|---|---|-------|------|-------|
| >tr A0A5F4CQU2 A0A5F4CQU2_CANLF Ig-like domain-containing protein<br>OS=Canis lupus familiaris OX=9615 GN=DLA-DMB PE=3 SV=1                | 0.17 | 0.17 | 137.00 | 2299643.1 | 1 | 1 | 0 | 4.10  | 244  | 18966 |
| >tr J9P432 J9P432_CANLF Glutamine--fructose-6-phosphate transaminase<br>(isomerizing) OS=Canis lupus familiaris OX=9615 GN=GFPT1 PE=4 SV=2 | 0.11 | 0.11 | 190.30 | 2288263.6 | 1 | 1 | 0 | 1.18  | 677  | 7191  |
| >tr A0A5F4CDM1 A0A5F4CDM1_CANLF L-lactate dehydrogenase<br>OS=Canis lupus familiaris OX=9615 PE=3 SV=1                                     | 0.39 | 0.37 | 134.60 | 2285583.9 | 2 | 1 | 0 | 2.87  | 279  | 43073 |
| >tr A0A5F4CKD5 A0A5F4CKD5_CANLF Polypeptide N-<br>acetylglactosaminyltransferase OS=Canis lupus familiaris<br>OX=9615 GN=GALNT6 PE=3 SV=1  | 1.49 | 1.47 | 307.80 | 2263491.3 | 2 | 1 | 0 | 4.97  | 644  | 1617  |
| >sp Q28895 NPC2_CANLF NPC intracellular cholesterol transporter 2<br>OS=Canis lupus familiaris OX=9615 GN=NPC2 PE=2 SV=1                   | 3.68 | 3.66 | 442.50 | 2255318.2 | 2 | 1 | 0 | 15.44 | 149  | 153   |
| >tr A0A5F4CGS8 A0A5F4CGS8_CANLF Olfactory receptor<br>OS=Canis lupus familiaris OX=9615 GN=OR6C63 PE=3 SV=1                                | 0.11 | 0.11 | 41.90  | 2225580.3 | 1 | 1 | 0 | 8.06  | 310  | 26555 |
| >tr A0A5F4CCD0 A0A5F4CCD0_CANLF Cysteine rich secretory protein 2<br>OS=Canis lupus familiaris OX=9615 GN=CRISP2 PE=3 SV=1                 | 2.41 | 2.33 | 268.00 | 2221665.5 | 5 | 1 | 0 | 4.82  | 311  | 11017 |
| >tr A0A5F4D799 A0A5F4D799_CANLF MPN domain containing<br>OS=Canis lupus familiaris OX=9615 GN=MPND PE=4 SV=1                               | 0.82 | 0.80 | 104.40 | 2187291.3 | 2 | 1 | 0 | 3.07  | 618  | 8215  |
| >tr A0A5F4CIC9 A0A5F4CIC9_CANLF Prolylcarboxypeptidase<br>OS=Canis lupus familiaris OX=9615 GN=PRCP PE=3 SV=1                              | 0.10 | 0.05 | 30.40  | 2137369.6 | 1 | 1 | 0 | 7.78  | 450  | 20776 |
| >tr A0A5F4CQU2 A0A5F4CQU2_CANLF Ig-like domain-containing protein<br>OS=Canis lupus familiaris OX=9615 GN=DLA-DMB PE=3 SV=1                | 0.41 | 0.41 | 100.10 | 2133015.0 | 1 | 1 | 0 | 4.10  | 244  | 18966 |
| >tr A0A5F4CCD0 A0A5F4CCD0_CANLF Cysteine rich secretory protein 2<br>OS=Canis lupus familiaris OX=9615 GN=CRISP2 PE=3 SV=1                 | 4.59 | 4.51 | 438.50 | 2128551.2 | 5 | 1 | 0 | 4.82  | 311  | 11017 |
| >tr F1Q1L4 F1Q1L4_CANLF Chromosome 6 C16orf89 homolog<br>OS=Canis lupus familiaris OX=9615 GN=C6H16orf89 PE=4 SV=2                         | 5.11 | 3.85 | 254.90 | 2081809.0 | 2 | 2 | 0 | 8.31  | 373  | 20319 |
| >tr F1PEN8 F1PEN8_CANLF Carboxylic ester hydrolase<br>OS=Canis lupus familiaris OX=9615 GN=BCHE PE=3 SV=1                                  | 1.07 | 1.07 | 192.20 | 2070592.3 | 1 | 1 | 0 | 1.33  | 602  | 4179  |
| >tr A0A5F4CKD5 A0A5F4CKD5_CANLF Polypeptide N-<br>acetylglactosaminyltransferase OS=Canis lupus familiaris<br>OX=9615 GN=GALNT6 PE=3 SV=1  | 0.91 | 0.91 | 195.10 | 2068815.9 | 1 | 1 | 0 | 4.97  | 644  | 1617  |
| >tr J9NRX4 J9NRX4_CANLF Glutathione transferase OS=Canis lupus familiaris<br>OX=9615 GN=LOC481841 PE=3 SV=2                                | 1.57 | 1.57 | 302.90 | 2041225.5 | 1 | 1 | 0 | 10.98 | 246  | 15581 |
| >tr A0A5F4BT11 A0A5F4BT11_CANLF Ecdysoneless cell cycle regulator<br>OS=Canis lupus familiaris OX=9615 GN=ECD PE=4 SV=1                    | 0.10 | 0.10 | 99.30  | 2034336.8 | 1 | 1 | 0 | 1.52  | 656  | 8613  |
| >tr A0A5F4CKD5 A0A5F4CKD5_CANLF Polypeptide N-<br>acetylglactosaminyltransferase OS=Canis lupus familiaris OX=9615<br>GN=GALNT6 PE=3 SV=1  | 1.43 | 1.43 | 304.30 | 2021793.5 | 1 | 1 | 0 | 4.97  | 644  | 1617  |
| >tr A0A5F4CS14 A0A5F4CS14_CANLF Guanylate cyclase<br>OS=Canis lupus familiaris OX=9615 GN=GUCY1A2 PE=3 SV=1                                | 0.10 | 0.04 | 128.50 | 1996180.5 | 2 | 1 | 0 | 1.03  | 773  | 1560  |
| >sp O46607 GPX5_CANLF Epididymal secretory glutathione peroxidase<br>OS=Canis lupus familiaris OX=9615 GN=GPX5 PE=2 SV=1                   | 0.97 | 0.91 | 385.10 | 1993964.0 | 4 | 1 | 0 | 6.79  | 221  | 564   |
| >tr J9P3D0 J9P3D0_CANLF Solute carrier family 4 member 9<br>OS=Canis lupus familiaris OX=9615 GN=SLC4A9 PE=3 SV=2                          | 0.16 | 0.16 | 100.90 | 1970303.4 | 1 | 1 | 0 | 1.12  | 893  | 31921 |
| >tr J9P8X1 J9P8X1_CANLF Exportin 5 OS=Canis lupus familiaris<br>OX=9615 GN=XPO5 PE=4 SV=1                                                  | 0.63 | 0.63 | 177.70 | 1935986.6 | 1 | 1 | 0 | 3.42  | 1345 | 1738  |



|                                                                                                                                      |      |      |        |           |   |   |   |       |      |       |
|--------------------------------------------------------------------------------------------------------------------------------------|------|------|--------|-----------|---|---|---|-------|------|-------|
| >tr A0A5F4C3Q4 A0A5F4C3Q4_CANLF Polypyrimidine tract binding protein 2<br>OS=Canis lupus familiaris OX=9615 GN=PTBP2 PE=4 SV=1       | 0.87 | 0.87 | 166.70 | 1865265.3 | 1 | 1 | 0 | 2.25  | 356  | 10982 |
| >tr F1Q021 F1Q021_CANLF Family with sequence similarity 160 member A1<br>OS=Canis lupus familiaris OX=9615 GN=FAM160A1 PE=3 SV=3     | 0.10 | 0.04 | 126.70 | 1805815.1 | 1 | 1 | 0 | 1.73  | 1040 | 41948 |
| >tr F1PUY8 F1PUY8_CANLF Anoctamin OS=Canis lupus familiaris<br>OX=9615 GN=ANO7 PE=3 SV=3                                             | 1.12 | 1.12 | 82.60  | 1769223.1 | 1 | 1 | 0 | 0.92  | 865  | 40808 |
| >tr A0A5F4CKD5 A0A5F4CKD5_CANLF Polypeptide N-acetylglucosaminyltransferase OS=Canis lupus familiaris<br>OX=9615 GN=GALNT6 PE=3 SV=1 | 1.01 | 1.01 | 231.30 | 1763524.0 | 1 | 1 | 0 | 4.97  | 644  | 1617  |
| >tr F1PIZ1 F1PIZ1_CANLF Caspase recruitment domain family member 6<br>OS=Canis lupus familiaris OX=9615 GN=CARD6 PE=4 SV=3           | 0.10 | 0.10 | 57.30  | 1762056.6 | 1 | 1 | 0 | 0.65  | 1071 | 14260 |
| >tr F1PB68 F1PB68_CANLF Olfactomedin 4 OS=Canis lupus familiaris<br>OX=9615 GN=OLFM4 PE=4 SV=3                                       | 3.45 | 3.41 | 381.60 | 1678911.3 | 3 | 1 | 0 | 4.40  | 477  | 17246 |
| >tr A0A5F4CQS4 A0A5F4CQS4_CANLF von Willebrand factor A domain containing 1 OS=Canis lupus familiaris OX=9615 GN=VWA1 PE=4 SV=1      | 4.29 | 4.27 | 258.00 | 1675401.4 | 2 | 1 | 0 | 3.95  | 456  | 3829  |
| >tr F1Q074 F1Q074_CANLF A-kinase anchoring protein 13<br>OS=Canis lupus familiaris OX=9615 GN=AKAP13 PE=4 SV=3                       | 0.87 | 0.82 | 190.60 | 1661255.8 | 4 | 1 | 0 | 0.29  | 2781 | 14817 |
| >tr E2REZ4 E2REZ4_CANLF Coiled-coil and C2 domain containing 2A<br>OS=Canis lupus familiaris OX=9615 GN=CC2D2A PE=4 SV=3             | 0.10 | 0.02 | 231.80 | 1661127.2 | 3 | 1 | 0 | 0.76  | 1585 | 29419 |
| >tr A0A5F4D032 A0A5F4D032_CANLF ATP binding cassette subfamily C member 11 OS=Canis lupus familiaris OX=9615 GN=ABCC11 PE=4 SV=1     | 0.31 | 0.30 | 136.50 | 1638436.4 | 2 | 1 | 0 | 0.58  | 1372 | 7749  |
| >tr F1PUY8 F1PUY8_CANLF Anoctamin OS=Canis lupus familiaris<br>OX=9615 GN=ANO7 PE=3 SV=3                                             | 0.35 | 0.36 | 66.50  | 1626138.0 | 1 | 1 | 0 | 0.92  | 865  | 40808 |
| >tr J9NS29 J9NS29_CANLF Cystatin domain-containing protein<br>OS=Canis lupus familiaris OX=9615 GN=LOC607874 PE=4 SV=2               | 1.60 | 1.60 | 230.10 | 1602615.8 | 1 | 1 | 0 | 4.79  | 313  | 30016 |
| >sp Q6AW47 EST5A_CANLF Carboxylesterase 5A OS=Canis lupus familiaris<br>OX=9615 GN=CES5A PE=2 SV=1                                   | 3.31 | 3.29 | 402.70 | 1587805.2 | 2 | 1 | 0 | 3.65  | 575  | 629   |
| >tr E2QUV3 E2QUV3_CANLF Alpha-2-HS-glycoprotein<br>OS=Canis lupus familiaris OX=9615 GN=AHSG PE=4 SV=2                               | 1.18 | 1.16 | 241.50 | 1533431.5 | 2 | 1 | 0 | 8.49  | 365  | 20747 |
| >sp O18840 ACTB_CANLF Actin. cytoplasmic 1 OS=Canis lupus familiaris<br>OX=9615 GN=ACTB PE=2 SV=3                                    | 1.70 | 1.02 | 226.20 | 1527815.7 | 3 | 2 | 0 | 8.27  | 375  | 642   |
| >tr E2RN70 E2RN70_CANLF Periphilin 1 OS=Canis lupus familiaris<br>OX=9615 GN=PPHLN1 PE=4 SV=3                                        | 0.25 | 0.25 | 94.80  | 1526019.1 | 1 | 1 | 0 | 1.92  | 416  | 41626 |
| >tr E2R740 E2R740_CANLF AMP deaminase OS=Canis lupus familiaris<br>OX=9615 GN=AMPD3 PE=3 SV=2                                        | 0.14 | 0.14 | 93.50  | 1509846.9 | 1 | 1 | 0 | 3.99  | 777  | 24146 |
| >tr J9P540 J9P540_CANLF Glyceraldehyde-3-phosphate dehydrogenase<br>OS=Canis lupus familiaris OX=9615 GN=LOC477441 PE=3 SV=1         | 0.83 | 0.83 | 176.20 | 1459388.0 | 1 | 1 | 0 | 7.19  | 334  | 13273 |
| >tr A0A5F4CPK4 A0A5F4CPK4_CANLF Formin binding protein 1<br>OS=Canis lupus familiaris OX=9615 GN=FNBP1 PE=4 SV=1                     | 1.19 | 1.20 | 105.70 | 1430119.3 | 1 | 1 | 0 | 1.42  | 562  | 14071 |
| >tr E2R5P5 E2R5P5_CANLF Calcyclin OS=Canis lupus familiaris<br>OX=9615 GN=S100A8 PE=4 SV=2                                           | 0.99 | 0.99 | 333.20 | 1371921.0 | 1 | 1 | 0 | 14.66 | 191  | 27843 |
| >tr A0A5F4CDM1 A0A5F4CDM1_CANLF L-lactate dehydrogenase<br>OS=Canis lupus familiaris OX=9615 PE=3 SV=1                               | 0.75 | 0.75 | 141.70 | 1346833.8 | 1 | 1 | 0 | 2.87  | 279  | 43073 |
| >tr F1PX57 F1PX57_CANLF 26S proteasome non-ATPase regulatory subunit 1<br>OS=Canis lupus familiaris OX=9615 GN=PSMD1 PE=3 SV=3       | 0.25 | 0.23 | 77.40  | 1340730.7 | 2 | 1 | 0 | 0.84  | 953  | 11564 |

|                                                                                                                                                    |      |      |        |           |   |   |   |       |      |       |
|----------------------------------------------------------------------------------------------------------------------------------------------------|------|------|--------|-----------|---|---|---|-------|------|-------|
| >tr A0A5F4CDM1 A0A5F4CDM1_CANLF L-lactate dehydrogenase<br>OS=Canis lupus familiaris OX=9615 PE=3 SV=1                                             | 0.47 | 0.47 | 128.90 | 1340687.1 | 1 | 1 | 0 | 2.87  | 279  | 43073 |
| >tr E2R5F1 E2R5F1_CANLF Exocyst complex component 8<br>OS=Canis lupus familiaris OX=9615 GN=EXOC8 PE=3 SV=1                                        | 0.64 | 0.64 | 54.00  | 1328079.5 | 1 | 1 | 0 | 2.20  | 727  | 7157  |
| >tr F1P9C4 F1P9C4_CANLF Alpha-mannosidase OS=Canis lupus familiaris<br>OX=9615 GN=MAN2A1 PE=3 SV=3                                                 | 2.38 | 2.39 | 325.70 | 1326348.2 | 1 | 1 | 0 | 2.62  | 1106 | 11653 |
| >tr E2R8Z9 E2R8Z9_CANLF Glutathione S-transferase C-terminal domain-<br>containing protein OS=Canis lupus familiaris OX=9615 GN=GSTCD PE=3<br>SV=1 | 0.49 | 0.47 | 279.40 | 1301258.4 | 2 | 1 | 0 | 3.66  | 629  | 6707  |
| >tr E2RGI8 E2RGI8_CANLF Bestrophin OS=Canis lupus familiaris<br>OX=9615 GN=BEST4 PE=3 SV=1                                                         | 0.12 | 0.12 | 90.70  | 1296156.2 | 1 | 1 | 0 | 3.59  | 473  | 27005 |
| >tr F2Z4Q6 F2Z4Q6_CANLF Alpha fetoprotein OS=Canis lupus familiaris<br>OX=9615 GN=AFP PE=4 SV=2                                                    | 2.54 | 2.54 | 268.90 | 1293047.1 | 1 | 1 | 0 | 2.04  | 637  | 24990 |
| >tr A0A5F4D662 A0A5F4D662_CANLF Par-3 family cell polarity regulator beta<br>OS=Canis lupus familiaris OX=9615 GN=PAR3B PE=3 SV=1                  | 0.25 | 0.25 | 132.70 | 1285599.9 | 1 | 1 | 0 | 0.70  | 1142 | 8202  |
| >tr F1PCE5 F1PCE5_CANLF Serpin family A member 1<br>OS=Canis lupus familiaris OX=9615 GN=SERPINA1 PE=3 SV=3                                        | 2.50 | 1.56 | 245.80 | 1281937.6 | 2 | 2 | 0 | 5.46  | 421  | 8323  |
| >tr A0A5F4CXJ3 A0A5F4CXJ3_CANLF Neurofibromin 1<br>OS=Canis lupus familiaris OX=9615 GN=NF1 PE=4 SV=1                                              | 0.49 | 0.49 | 178.70 | 1237785.6 | 1 | 1 | 0 | 1.79  | 2733 | 32406 |
| >tr J9NSV2 J9NSV2_CANLF Olfactory receptor OS=Canis lupus familiaris<br>OX=9615 GN=OR5AC27 PE=3 SV=2                                               | 0.10 | 0.06 | 47.60  | 1236988.8 | 1 | 1 | 0 | 5.88  | 306  | 42329 |
| >sp Q9XS65 PTGDS_CANLF Prostaglandin-H2 D-isomerase<br>OS=Canis lupus familiaris OX=9615 GN=PTGDS PE=2 SV=1                                        | 2.52 | 2.44 | 301.70 | 1199427.4 | 5 | 1 | 0 | 8.90  | 191  | 165   |
| >tr J9P434 J9P434_CANLF Myotubularin related protein 14<br>OS=Canis lupus familiaris OX=9615 GN=MTMR14 PE=4 SV=2                                   | 0.90 | 0.90 | 87.80  | 1154158.4 | 1 | 1 | 0 | 1.51  | 596  | 17413 |
| >sp Q8WNN6 SODC_CANLF Superoxide dismutase [Cu-Zn]<br>OS=Canis lupus familiaris OX=9615 GN=SOD1 PE=2 SV=1                                          | 1.05 | 1.05 | 145.10 | 1110661.1 | 1 | 1 | 0 | 15.69 | 153  | 6     |
| >tr F1PFF2 F1PFF2_CANLF Protein S100 OS=Canis lupus familiaris<br>OX=9615 GN=S100A11 PE=3 SV=3                                                     | 0.10 | 0.06 | 162.00 | 1108493.4 | 1 | 1 | 1 | 10.48 | 105  | 36095 |
| >sp Q9TT90 ANDR_CANLF Androgen receptor OS=Canis lupus familiaris<br>OX=9615 GN=AR PE=2 SV=1                                                       | 0.34 | 0.34 | 30.30  | 1107220.0 | 1 | 1 | 0 | 0.33  | 907  | 397   |
| >tr F1PBI5 F1PBI5_CANLF CUB and Sushi multiple domains 1<br>OS=Canis lupus familiaris OX=9615 GN=CSMD1 PE=4 SV=3                                   | 0.24 | 0.24 | 118.60 | 1103722.4 | 1 | 1 | 0 | 0.57  | 3535 | 25631 |
| >tr F1PW86 F1PW86_CANLF Inositol 1.4.5-trisphosphate receptor type 1<br>OS=Canis lupus familiaris OX=9615 GN=ITPR1 PE=3 SV=3                       | 0.10 | 0.09 | 58.80  | 1082468.2 | 1 | 1 | 1 | 0.76  | 2628 | 4403  |
| >tr A0A5F4C9R4 A0A5F4C9R4_CANLF Integrin subunit alpha V<br>OS=Canis lupus familiaris OX=9615 GN=ITGAV PE=3 SV=1                                   | 0.10 | 0.07 | 85.60  | 1077738.8 | 2 | 1 | 0 | 1.45  | 1033 | 3280  |
| >tr F6PLX8 F6PLX8_CANLF Beta-defensin OS=Canis lupus familiaris<br>OX=9615 GN=DEFB118 PE=3 SV=1                                                    | 2.25 | 2.23 | 172.10 | 1059339.8 | 2 | 1 | 0 | 8.77  | 171  | 34287 |
| >tr F6XVF5 F6XVF5_CANLF WD repeat domain 72<br>OS=Canis lupus familiaris OX=9615 GN=WDR72 PE=4 SV=2                                                | 0.88 | 0.88 | 136.90 | 1059203.5 | 1 | 1 | 0 | 0.75  | 1071 | 16644 |
| >sp P49822 ALBU_CANLF Albumin OS=Canis lupus familiaris<br>OX=9615 GN=ALB PE=1 SV=3                                                                | 2.27 | 2.27 | 311.80 | 1049389.2 | 1 | 1 | 0 | 3.45  | 608  | 490   |
| >tr A0A5F4C6B5 A0A5F4C6B5_CANLF Plastin 3 OS=Canis lupus familiaris<br>OX=9615 GN=PLS3 PE=4 SV=1                                                   | 1.12 | 1.12 | 260.60 | 1045936.4 | 1 | 1 | 0 | 4.07  | 639  | 30730 |

|                                                                                                                                                  |      |      |        |           |   |   |   |       |      |       |
|--------------------------------------------------------------------------------------------------------------------------------------------------|------|------|--------|-----------|---|---|---|-------|------|-------|
| >tr F1PDB9 F1PDB9_CANLF Toll like receptor 4 OS=Canis lupus familiaris<br>OX=9615 GN=TLR4 PE=3 SV=2                                              | 0.10 | 0.10 | 102.60 | 1028130.0 | 1 | 1 | 0 | 0.96  | 833  | 36972 |
| >tr A0A5F4D9R9 A0A5F4D9R9_CANLF Phosphoribosyl pyrophosphate<br>synthetase 1 like 1 OS=Canis lupus familiaris OX=9615 GN=PRPS1L1 PE=3<br>SV=1    | 0.80 | 0.80 | 141.10 | 1027846.7 | 1 | 1 | 0 | 6.72  | 268  | 31528 |
| >tr E2RG75 E2RG75_CANLF Inactive ribonuclease-like protein 9<br>OS=Canis lupus familiaris OX=9615 GN=RNASE9 PE=3 SV=2                            | 3.07 | 3.05 | 289.30 | 1011133.2 | 2 | 1 | 0 | 7.07  | 198  | 41734 |
| >tr A0A5F4D654 A0A5F4D654_CANLF Nucleotide binding oligomerization<br>domain containing 2 OS=Canis lupus familiaris OX=9615 GN=NOD2 PE=4<br>SV=1 | 0.21 | 0.21 | 123.50 | 973418.0  | 1 | 1 | 0 | 2.09  | 957  | 2067  |
| >tr A0A5F4DA59 A0A5F4DA59_CANLF Cystatin B OS=Canis lupus familiaris<br>OX=9615 GN=CSTB PE=3 SV=1                                                | 0.67 | 0.65 | 178.20 | 960092.3  | 2 | 1 | 0 | 12.50 | 96   | 8919  |
| >tr A0A5F4CKD5 A0A5F4CKD5_CANLF Polypeptide N-<br>acetylgalactosaminyltransferase OS=Canis lupus familiaris OX=9615<br>GN=GALNT6 PE=3 SV=1       | 2.13 | 2.13 | 271.60 | 935901.4  | 1 | 1 | 0 | 4.97  | 644  | 1617  |
| >tr E2RGC9 E2RGC9_CANLF Target of EGR1. exonuclease<br>OS=Canis lupus familiaris OX=9615 GN=TOE1 PE=3 SV=1                                       | 0.24 | 0.24 | 90.40  | 885958.7  | 1 | 1 | 0 | 1.57  | 510  | 36568 |
| >tr A0A5F4CPK4 A0A5F4CPK4_CANLF Formin binding protein 1<br>OS=Canis lupus familiaris OX=9615 GN=FNBP1 PE=4 SV=1                                 | 0.10 | 0.09 | 99.30  | 856436.5  | 1 | 1 | 0 | 1.42  | 562  | 14071 |
| >tr A0A5F4BVH6 A0A5F4BVH6_CANLF KIAA1549 OS=Canis lupus<br>familiaris OX=9615 GN=KIAA1549 PE=4 SV=1                                              | 0.60 | 0.59 | 196.60 | 851657.8  | 2 | 1 | 0 | 0.50  | 1793 | 5440  |
| >tr A0A5F4D662 A0A5F4D662_CANLF Par-3 family cell polarity regulator beta<br>OS=Canis lupus familiaris OX=9615 GN=PAR3B PE=3 SV=1                | 0.13 | 0.13 | 111.60 | 838803.2  | 1 | 1 | 0 | 0.70  | 1142 | 8202  |
| >tr A0A5F4C3M5 A0A5F4C3M5_CANLF IQ motif containing GTPase<br>activating protein 2 OS=Canis lupus familiaris OX=9615 GN=IQGAP2 PE=4<br>SV=1      | 0.11 | 0.11 | 95.20  | 834096.3  | 1 | 1 | 0 | 0.51  | 1577 | 1056  |
| >tr E2R6E0 E2R6E0_CANLF Lipocln_cytosolic_FA-bd_dom domain-containing<br>protein OS=Canis lupus familiaris OX=9615 GN=LCNL1 PE=3 SV=2            | 0.97 | 0.91 | 267.20 | 830526.5  | 4 | 1 | 0 | 3.68  | 299  | 1932  |
| >tr E2RGF6 E2RGF6_CANLF WD repeat and HMG-box DNA binding protein 1<br>OS=Canis lupus familiaris OX=9615 GN=WDHD1 PE=4 SV=3                      | 0.10 | 0.09 | 60.50  | 824042.5  | 1 | 1 | 0 | 0.73  | 1103 | 21537 |
| >tr A0A5F4DE62 A0A5F4DE62_CANLF Ataxin 2 like OS=Canis lupus<br>familiaris OX=9615 GN=ATXN2L PE=3 SV=1                                           | 0.81 | 0.81 | 107.50 | 813562.7  | 1 | 1 | 0 | 0.90  | 1005 | 12591 |
| >tr E2RSH8 E2RSH8_CANLF Tyrosine-protein kinase OS=Canis lupus<br>familiaris OX=9615 GN=SRC PE=3 SV=2                                            | 0.21 | 0.21 | 124.70 | 805266.1  | 1 | 1 | 1 | 8.40  | 536  | 23529 |
| >tr A0A5F4CS14 A0A5F4CS14_CANLF Guanylate cyclase<br>OS=Canis lupus familiaris OX=9615 GN=GUCY1A2 PE=3 SV=1                                      | 0.18 | 0.18 | 128.20 | 788052.7  | 1 | 1 | 0 | 1.03  | 773  | 1560  |
| >tr E2R6E0 E2R6E0_CANLF Lipocln_cytosolic_FA-bd_dom domain-containing<br>protein OS=Canis lupus familiaris OX=9615 GN=LCNL1 PE=3 SV=2            | 1.23 | 1.21 | 202.40 | 774560.2  | 2 | 1 | 0 | 3.68  | 299  | 1932  |
| >tr F1PRT7 F1PRT7_CANLF Cation-transporting ATPase<br>OS=Canis lupus familiaris OX=9615 GN=ATP13A4 PE=3 SV=2                                     | 0.44 | 0.44 | 112.80 | 770209.0  | 1 | 1 | 0 | 0.67  | 1197 | 1348  |
| >tr F1PNW0 F1PNW0_CANLF PMS1 homolog 2. mismatch repair system<br>component OS=Canis lupus familiaris OX=9615 GN=PMS2 PE=3 SV=3                  | 0.28 | 0.28 | 69.00  | 759546.8  | 1 | 1 | 0 | 1.45  | 897  | 14263 |
| >tr E2R6E0 E2R6E0_CANLF Lipocln_cytosolic_FA-bd_dom domain-containing<br>protein OS=Canis lupus familiaris OX=9615 GN=LCNL1 PE=3 SV=2            | 2.67 | 2.61 | 320.40 | 757271.8  | 4 | 1 | 0 | 3.68  | 299  | 1932  |

|                                                                                                                                                            |      |      |        |          |   |   |   |       |      |       |
|------------------------------------------------------------------------------------------------------------------------------------------------------------|------|------|--------|----------|---|---|---|-------|------|-------|
| >tr F1PTW3 F1PTW3_CANLF KIAA0753 OS=Canis lupus familiaris<br>OX=9615 GN=KIAA0753 PE=4 SV=3                                                                | 0.49 | 0.49 | 151.00 | 739731.3 | 1 | 1 | 0 | 0.88  | 905  | 33899 |
| >tr E2QSN3 E2QSN3_CANLF Teashirt zinc finger homeobox 1<br>OS=Canis lupus familiaris OX=9615 GN=TSHZ1 PE=3 SV=2                                            | 0.95 | 0.95 | 75.20  | 735263.0 | 1 | 1 | 0 | 1.82  | 1098 | 44714 |
| >tr A0A5F4CPK4 A0A5F4CPK4_CANLF Formin binding protein 1<br>OS=Canis lupus familiaris OX=9615 GN=FNBP1 PE=4 SV=1                                           | 0.10 | 0.08 | 85.40  | 700779.6 | 1 | 1 | 0 | 1.42  | 562  | 14071 |
| >tr E2R8Z9 E2R8Z9_CANLF Glutathione S-transferase C-terminal domain-<br>containing protein OS=Canis lupus familiaris OX=9615 GN=GSTCD PE=3<br>SV=1         | 0.28 | 0.26 | 123.70 | 691489.8 | 2 | 1 | 0 | 3.66  | 629  | 6707  |
| >tr F1PF06 F1PF06_CANLF Sodium channel protein OS=Canis lupus familiaris<br>OX=9615 GN=SCN7A PE=3 SV=3                                                     | 0.29 | 0.25 | 94.80  | 662161.6 | 3 | 1 | 0 | 0.36  | 1677 | 19116 |
| >tr E2RG75 E2RG75_CANLF Inactive ribonuclease-like protein 9<br>OS=Canis lupus familiaris OX=9615 GN=RNASE9 PE=3 SV=2                                      | 1.78 | 1.74 | 267.60 | 655679.1 | 3 | 1 | 0 | 7.07  | 198  | 41734 |
| >sp Q95168 ZO2_CANLF Tight junction protein ZO-2 OS=Canis lupus<br>familiaris OX=9615 GN=TJP2 PE=1 SV=1                                                    | 0.73 | 0.73 | 118.70 | 650746.5 | 1 | 1 | 1 | 1.87  | 1174 | 13    |
| >tr F6UVH0 F6UVH0_CANLF WD_REPEATS_REGION domain-containing<br>protein OS=Canis lupus familiaris OX=9615 GN=WDR77 PE=4 SV=2                                | 0.10 | 0.02 | 78.40  | 624851.4 | 2 | 1 | 0 | 2.74  | 475  | 26525 |
| >tr E2RD46 E2RD46_CANLF Apolipoprotein B mRNA editing enzyme catalytic<br>polypeptide like 4 OS=Canis lupus familiaris OX=9615 GN=APOBEC4 PE=4<br>SV=2     | 0.22 | 0.22 | 123.30 | 619578.0 | 1 | 1 | 0 | 8.12  | 357  | 31853 |
| >sp P25473 CLUS_CANLF Clusterin OS=Canis lupus familiaris<br>OX=9615 GN=CLU PE=2 SV=1                                                                      | 0.81 | 0.81 | 206.60 | 617120.7 | 1 | 1 | 0 | 2.70  | 445  | 725   |
| >tr F1PLT8 F1PLT8_CANLF Sulfhydryl oxidase OS=Canis lupus familiaris<br>OX=9615 GN=QSOX1 PE=3 SV=3                                                         | 2.07 | 2.07 | 265.00 | 617115.5 | 1 | 1 | 0 | 3.35  | 568  | 33056 |
| >tr A0A5F4D8W3 A0A5F4D8W3_CANLF Vitamin K-dependent protein S<br>OS=Canis lupus familiaris OX=9615 GN=PROS1 PE=4 SV=1                                      | 0.48 | 0.42 | 34.40  | 603845.3 | 4 | 1 | 0 | 1.58  | 505  | 1354  |
| >tr A0A5F4D6X1 A0A5F4D6X1_CANLF Cysteine rich secretory protein 2<br>OS=Canis lupus familiaris OX=9615 GN=CRISP2 PE=3 SV=1                                 | 0.43 | 0.43 | 201.10 | 602729.8 | 1 | 1 | 1 | 5.30  | 321  | 3538  |
| >tr A0A5F4D4G2 A0A5F4D4G2_CANLF LLGL scribble cell polarity complex<br>component 1 OS=Canis lupus familiaris OX=9615 GN=LLGL1 PE=3 SV=1                    | 0.25 | 0.25 | 66.90  | 580727.6 | 1 | 1 | 0 | 0.52  | 1159 | 7946  |
| >tr A0A5F4DHV7 A0A5F4DHV7_CANLF Helicase with zinc finger<br>OS=Canis lupus familiaris OX=9615 GN=HELZ PE=4 SV=1                                           | 0.51 | 0.51 | 113.80 | 574010.6 | 1 | 1 | 0 | 1.12  | 1424 | 33012 |
| >tr E2RPJ3 E2RPJ3_CANLF Serine/threonine-protein kinase RIO3<br>OS=Canis lupus familiaris OX=9615 GN=RIOK3 PE=3 SV=2                                       | 0.79 | 0.79 | 161.10 | 567930.3 | 1 | 1 | 0 | 4.43  | 519  | 16472 |
| >tr A0A5F4BQT1 A0A5F4BQT1_CANLF YEATS domain containing 2<br>OS=Canis lupus familiaris OX=9615 GN=YEATS2 PE=4 SV=1                                         | 0.10 | 0.11 | 106.00 | 554184.8 | 1 | 1 | 1 | 1.73  | 1326 | 5342  |
| >tr E2QX17 E2QX17_CANLF Proteasome subunit beta OS=Canis lupus<br>familiaris OX=9615 GN=PSMB3 PE=3 SV=1                                                    | 0.27 | 0.27 | 70.50  | 549481.2 | 1 | 1 | 1 | 17.07 | 205  | 13730 |
| >tr A0A5F4DCP3 A0A5F4DCP3_CANLF Centrobin. centriole duplication and<br>spindle assembly protein OS=Canis lupus familiaris OX=9615 GN=CENTROB<br>PE=4 SV=1 | 0.27 | 0.27 | 50.50  | 537471.3 | 1 | 1 | 1 | 2.33  | 858  | 1454  |
| >tr A0A5F4CLU1 A0A5F4CLU1_CANLF Superoxide dismutase [Cu-Zn]<br>OS=Canis lupus familiaris OX=9615 GN=SOD1 PE=3 SV=1                                        | 0.83 | 0.83 | 141.50 | 529059.9 | 1 | 1 | 0 | 7.09  | 141  | 25417 |
| >tr F1PUC4 F1PUC4_CANLF Olfactory receptor OS=Canis lupus familiaris<br>OX=9615 GN=OR51T1 PE=3 SV=3                                                        | 0.31 | 0.31 | 159.00 | 526689.9 | 1 | 1 | 0 | 2.45  | 327  | 41557 |

|                                                                                                                                                       |      |      |        |          |   |   |   |      |      |       |
|-------------------------------------------------------------------------------------------------------------------------------------------------------|------|------|--------|----------|---|---|---|------|------|-------|
| >tr F1PS03 F1PS03_CANLF 1-phosphatidylinositol 4,5-bisphosphate phosphodiesterase gamma OS=Canis lupus familiaris OX=9615 GN=PLCG1 PE=4 SV=2          | 0.13 | 0.13 | 130.30 | 524786.1 | 1 | 1 | 0 | 1.23 | 1217 | 6493  |
| >tr A0A5F4DEV4 A0A5F4DEV4_CANLF Calmodulin 1 OS=Canis lupus familiaris OX=9615 GN=CALM1 PE=4 SV=1                                                     | 0.51 | 0.51 | 138.70 | 524387.4 | 1 | 1 | 0 | 9.09 | 187  | 2591  |
| >tr A0A5F4D4G2 A0A5F4D4G2_CANLF LLGL scribble cell polarity complex component 1 OS=Canis lupus familiaris OX=9615 GN=LLGL1 PE=3 SV=1                  | 0.10 | 0.04 | 86.00  | 514249.6 | 1 | 1 | 0 | 0.52 | 1159 | 7946  |
| >tr F1PRT7 F1PRT7_CANLF Cation-transporting ATPase OS=Canis lupus familiaris OX=9615 GN=ATP13A4 PE=3 SV=2                                             | 1.12 | 1.12 | 96.90  | 513919.2 | 1 | 1 | 0 | 0.67 | 1197 | 1348  |
| >tr E2R6E0 E2R6E0_CANLF Lipocln cytosolic FA-bd_dom domain-containing protein OS=Canis lupus familiaris OX=9615 GN=LCNL1 PE=3 SV=2                    | 0.78 | 0.76 | 272.40 | 503244.9 | 2 | 1 | 0 | 3.68 | 299  | 1932  |
| >tr E2R472 E2R472_CANLF Acyl-coenzyme A oxidase OS=Canis lupus familiaris OX=9615 GN=ACOX2 PE=3 SV=2                                                  | 0.52 | 0.52 | 125.30 | 496063.9 | 1 | 1 | 0 | 1.47 | 681  | 42004 |
| >sp Q9GL25 ESPB1_CANLF Epididymal sperm-binding protein 1 OS=Canis lupus familiaris OX=9615 GN=ELSPBP1 PE=1 SV=1                                      | 0.60 | 0.60 | 125.90 | 487682.0 | 1 | 1 | 0 | 6.94 | 245  | 36    |
| >tr F1P744 F1P744_CANLF Chondroitin sulfate proteoglycan 5 OS=Canis lupus familiaris OX=9615 GN=CSPG5 PE=4 SV=2                                       | 0.95 | 0.95 | 183.00 | 471758.0 | 1 | 1 | 0 | 4.74 | 401  | 18644 |
| >tr A0A5F4CFB6 A0A5F4CFB6_CANLF Potassium voltage-gated channel interacting protein 3 OS=Canis lupus familiaris OX=9615 GN=KCNIP3 PE=3 SV=1           | 0.49 | 0.49 | 101.90 | 467339.8 | 1 | 1 | 0 | 1.84 | 708  | 2187  |
| >tr F6XIT9 F6XIT9_CANLF Alpha kinase 2 OS=Canis lupus familiaris OX=9615 GN=ALPK2 PE=4 SV=1                                                           | 0.51 | 0.52 | 108.80 | 458434.5 | 1 | 1 | 0 | 0.95 | 2115 | 6659  |
| >tr E2R840 E2R840_CANLF Olfactory receptor OS=Canis lupus familiaris OX=9615 GN=OR4E2 PE=3 SV=2                                                       | 0.52 | 0.52 | 37.90  | 456403.9 | 1 | 1 | 0 | 4.22 | 308  | 8491  |
| >sp P25473 CLUS_CANLF Clusterin OS=Canis lupus familiaris OX=9615 GN=CLU PE=2 SV=1                                                                    | 0.26 | 0.26 | 158.40 | 450233.4 | 1 | 1 | 0 | 2.70 | 445  | 725   |
| >tr F6UZ83 F6UZ83_CANLF HscB mitochondrial iron-sulfur cluster cochaperone OS=Canis lupus familiaris OX=9615 GN=HSCB PE=3 SV=1                        | 0.81 | 0.81 | 87.40  | 421146.5 | 1 | 1 | 0 | 3.40 | 235  | 2614  |
| >tr A0A5F4CCD0 A0A5F4CCD0_CANLF Cysteine rich secretory protein 2 OS=Canis lupus familiaris OX=9615 GN=CRISP2 PE=3 SV=1                               | 2.73 | 2.73 | 270.40 | 393124.7 | 1 | 1 | 0 | 4.82 | 311  | 11017 |
| >tr E2QYJ9 E2QYJ9_CANLF Diphosphomevalonate decarboxylase OS=Canis lupus familiaris OX=9615 GN=MVD PE=3 SV=1                                          | 0.20 | 0.20 | 56.90  | 377243.6 | 1 | 1 | 0 | 5.25 | 400  | 43817 |
| >tr A0A5F4CCJ1 A0A5F4CCJ1_CANLF Transmembrane protein 241 OS=Canis lupus familiaris OX=9615 GN=TMEM241 PE=4 SV=1                                      | 0.91 | 0.91 | 239.00 | 363065.5 | 1 | 1 | 0 | 3.75 | 347  | 27419 |
| >tr A0A5F4DFG2 A0A5F4DFG2_CANLF SH3 domain and tetratricopeptide repeats 1 OS=Canis lupus familiaris OX=9615 GN=SH3TC1 PE=4 SV=1                      | 0.16 | 0.16 | 53.70  | 360435.6 | 1 | 1 | 1 | 1.30 | 1463 | 23163 |
| >tr A0A5F4BUE2 A0A5F4BUE2_CANLF SpoU_methylase domain-containing protein OS=Canis lupus familiaris OX=9615 GN=TARBP1 PE=4 SV=1                        | 0.93 | 0.93 | 107.00 | 354581.1 | 1 | 1 | 0 | 0.50 | 1602 | 2815  |
| >tr J9NRL7 J9NRL7_CANLF Phosphatidylinositol-3,4,5-trisphosphate dependent Rac exchange factor 1 OS=Canis lupus familiaris OX=9615 GN=PREX1 PE=4 SV=2 | 0.31 | 0.31 | 119.70 | 347874.9 | 1 | 1 | 0 | 1.32 | 1585 | 13450 |
| >tr A0A5F4D4V6 A0A5F4D4V6_CANLF Ankyrin repeat domain 52 OS=Canis lupus familiaris OX=9615 GN=ANKRD52 PE=4 SV=1                                       | 0.10 | 0.09 | 140.80 | 347283.3 | 1 | 1 | 0 | 1.87 | 1067 | 6228  |
| >tr F1PG67 F1PG67_CANLF Myelin transcription factor 1 OS=Canis lupus familiaris OX=9615 GN=MYT1 PE=3 SV=3                                             | 0.25 | 0.24 | 76.00  | 343529.7 | 2 | 1 | 0 | 1.29 | 1166 | 1094  |

|                                                                                                                                                                         |      |      |        |          |   |   |   |      |      |       |
|-------------------------------------------------------------------------------------------------------------------------------------------------------------------------|------|------|--------|----------|---|---|---|------|------|-------|
| >tr E2REQ4 E2REQ4_CANLF NIPA like domain containing 3<br>OS=Canis lupus familiaris OX=9615 GN=NIPAL3 PE=3 SV=3                                                          | 0.79 | 0.79 | 95.50  | 340565.2 | 1 | 1 | 0 | 1.90 | 368  | 39451 |
| >tr L7N0I7 L7N0I7_CANLF Tubulin beta chain OS=Canis lupus familiaris<br>OX=9615 GN=TUBB4B PE=3 SV=1                                                                     | 1.37 | 1.37 | 207.60 | 338150.6 | 1 | 1 | 0 | 6.07 | 445  | 2921  |
| >tr J9P9I8 J9P9I8_CANLF Chromosome 20 C3orf22 homolog<br>OS=Canis lupus familiaris OX=9615 GN=C20H3orf22 PE=4 SV=2                                                      | 0.27 | 0.27 | 23.40  | 331690.1 | 1 | 1 | 1 | 5.80 | 276  | 21775 |
| >tr F1PVA2 F1PVA2_CANLF Adhesion G protein-coupled receptor V1<br>OS=Canis lupus familiaris OX=9615 GN=ADGRV1 PE=4 SV=3                                                 | 0.10 | 0.04 | 99.80  | 316673.7 | 1 | 1 | 1 | 0.22 | 6300 | 19804 |
| >tr F1PVU3 F1PVU3_CANLF Non-specific serine/threonine protein kinase<br>OS=Canis lupus familiaris OX=9615 GN=MARK2 PE=3 SV=3                                            | 1.05 | 1.05 | 116.00 | 309933.1 | 1 | 1 | 0 | 0.98 | 813  | 14910 |
| >tr A0A5F4CNW2 A0A5F4CNW2_CANLF Radical S-adenosyl methionine and<br>flavodoxin domain-containing protein 1 OS=Canis lupus familiaris<br>OX=9615 GN=LOC479708 PE=3 SV=1 | 0.14 | 0.14 | 119.80 | 304090.8 | 1 | 1 | 1 | 1.04 | 670  | 13683 |
| >tr F1Q0W5 F1Q0W5_CANLF Interleukin 17 receptor D<br>OS=Canis lupus familiaris OX=9615 GN=IL17RD PE=4 SV=3                                                              | 0.10 | 0.11 | 61.70  | 291910.2 | 1 | 1 | 0 | 2.19 | 594  | 34031 |
| >tr Q2Z1P8 Q2Z1P8_CANLF Anion exchange protein OS=Canis lupus familiaris<br>OX=9615 GN=SLC4A1 PE=2 SV=1                                                                 | 0.28 | 0.28 | 90.00  | 282877.5 | 1 | 1 | 0 | 1.08 | 930  | 41370 |
| >tr E2RJS2 E2RJS2_CANLF Solute carrier family 27 member 1<br>OS=Canis lupus familiaris OX=9615 GN=SLC27A1 PE=3 SV=1                                                     | 0.10 | 0.06 | 91.40  | 280942.1 | 1 | 1 | 0 | 2.01 | 646  | 3080  |
| >tr F1PZI2 F1PZI2_CANLF RING-type E3 ubiquitin transferase<br>OS=Canis lupus familiaris OX=9615 GN=MIB2 PE=4 SV=3                                                       | 0.95 | 0.95 | 148.10 | 270721.4 | 1 | 1 | 0 | 1.19 | 1005 | 7737  |
| >tr A0A5F4CX38 A0A5F4CX38_CANLF Neurobeachin like 2<br>OS=Canis lupus familiaris OX=9615 GN=NBEAL2 PE=3 SV=1                                                            | 0.10 | 0.05 | 32.30  | 260456.3 | 1 | 1 | 1 | 0.67 | 2521 | 10261 |
| >tr F1PS03 F1PS03_CANLF 1-phosphatidylinositol 4,5-bisphosphate<br>phosphodiesterase gamma OS=Canis lupus familiaris<br>OX=9615 GN=PLCG1 PE=4 SV=2                      | 0.82 | 0.82 | 44.30  | 260383.5 | 1 | 1 | 0 | 1.23 | 1217 | 6493  |
| >tr A0A5F4D1W5 A0A5F4D1W5_CANLF PITPNM family member 3<br>OS=Canis lupus familiaris OX=9615 GN=PITPNM3 PE=3 SV=1                                                        | 0.95 | 0.95 | 87.80  | 241359.5 | 1 | 1 | 0 | 0.98 | 918  | 2286  |
| >tr A0A5F4CMG4 A0A5F4CMG4_CANLF Family with sequence similarity 114<br>member A2 OS=Canis lupus familiaris OX=9615 GN=FAM114A2 PE=3 SV=1                                | 0.17 | 0.17 | 89.20  | 239104.5 | 1 | 1 | 0 | 3.44 | 436  | 7934  |
| >tr J9NZ15 J9NZ15_CANLF Cadherin EGF LAG seven-pass G-type receptor 3<br>OS=Canis lupus familiaris OX=9615 GN=CELSR3 PE=3 SV=2                                          | 0.10 | 0.10 | 65.70  | 231059.4 | 1 | 1 | 1 | 0.59 | 2546 | 1516  |
| >tr F1PZI2 F1PZI2_CANLF RING-type E3 ubiquitin transferase<br>OS=Canis lupus familiaris OX=9615 GN=MIB2 PE=4 SV=3                                                       | 0.44 | 0.44 | 135.70 | 229703.4 | 1 | 1 | 0 | 1.19 | 1005 | 7737  |
| >tr A0A5F4BUL6 A0A5F4BUL6_CANLF Piezo-type mechanosensitive ion<br>channel component OS=Canis lupus familiaris<br>OX=9615 GN=PIEZO2 PE=3 SV=1                           | 0.47 | 0.47 | 92.90  | 222554.0 | 1 | 1 | 0 | 0.33 | 2696 | 1427  |
| >sp P49822 ALBU_CANLF Albumin OS=Canis lupus familiaris<br>OX=9615 GN=ALB PE=1 SV=3                                                                                     | 0.25 | 0.25 | 81.00  | 222048.7 | 1 | 1 | 0 | 1.97 | 608  | 490   |
| >tr A0A5F4CCJ1 A0A5F4CCJ1_CANLF Transmembrane protein 241<br>OS=Canis lupus familiaris OX=9615 GN=TMEM241 PE=4 SV=1                                                     | 0.41 | 0.41 | 147.40 | 215163.6 | 1 | 1 | 0 | 3.75 | 347  | 27419 |
| >tr F1PE24 F1PE24_CANLF SRF-dependent transcription regulation-associated<br>protein OS=Canis lupus familiaris OX=9615 GN=SRFBP1 PE=4 SV=3                              | 0.71 | 0.71 | 57.00  | 214069.9 | 1 | 1 | 0 | 3.27 | 428  | 19920 |
| >tr A0A5F4DGF5 A0A5F4DGF5_CANLF Alkaline phosphatase<br>OS=Canis lupus familiaris OX=9615 GN=ALPL PE=3 SV=1                                                             | 0.74 | 0.74 | 199.20 | 213265.5 | 1 | 1 | 0 | 1.75 | 572  | 6357  |

|                                                                                                                                         |      |      |        |          |   |   |   |      |      |       |
|-----------------------------------------------------------------------------------------------------------------------------------------|------|------|--------|----------|---|---|---|------|------|-------|
| >tr F1Q2F6 F1Q2F6_CANLF 3-hydroxyacyl-[acyl-carrier-protein] dehydratase<br>OS=Canis lupus familiaris OX=9615 GN=FASN PE=4 SV=3         | 0.10 | 0.10 | 32.40  | 210432.3 | 1 | 1 | 0 | 0.52 | 2478 | 22936 |
| >tr F1PXQ6 F1PXQ6_CANLF Polypeptide N-acetylgalactosaminyltransferase<br>OS=Canis lupus familiaris OX=9615 GN=GALNT17 PE=3 SV=2         | 0.38 | 0.38 | 145.70 | 203405.9 | 1 | 1 | 0 | 1.34 | 598  | 6799  |
| >tr F1PZI2 F1PZI2_CANLF RING-type E3 ubiquitin transferase<br>OS=Canis lupus familiaris OX=9615 GN=MIB2 PE=4 SV=3                       | 1.18 | 1.18 | 132.80 | 199402.9 | 1 | 1 | 0 | 1.19 | 1005 | 7737  |
| >tr A0A5F4D7J3 A0A5F4D7J3_CANLF Non-specific serine/threonine protein<br>kinase OS=Canis lupus familiaris OX=9615 GN=CDC42BPA PE=3 SV=1 | 0.24 | 0.25 | 108.80 | 197697.5 | 1 | 1 | 0 | 0.50 | 1794 | 1069  |
| >tr A0A5F4BUE2 A0A5F4BUE2_CANLF SpoU_methylase domain-containing<br>protein OS=Canis lupus familiaris OX=9615 GN=TARBP1 PE=4 SV=1       | 0.95 | 0.95 | 56.50  | 193001.7 | 1 | 1 | 0 | 0.50 | 1602 | 2815  |
| >tr F1PHM8 F1PHM8_CANLF Hexosyltransferase OS=Canis lupus familiaris<br>OX=9615 GN=B3GNT4 PE=3 SV=2                                     | 0.79 | 0.79 | 34.60  | 191931.1 | 1 | 1 | 0 | 2.24 | 357  | 33620 |
| >tr A0A5F4C9R4 A0A5F4C9R4_CANLF Integrin subunit alpha V<br>OS=Canis lupus familiaris OX=9615 GN=ITGAV PE=3 SV=1                        | 1.01 | 0.99 | 42.80  | 191599.7 | 2 | 1 | 0 | 1.45 | 1033 | 3280  |
| >tr E2RJG1 E2RJG1_CANLF Armadillo repeat containing X-linked 3<br>OS=Canis lupus familiaris OX=9615 GN=ARMCX3 PE=3 SV=2                 | 0.24 | 0.24 | 30.90  | 182099.3 | 1 | 1 | 1 | 5.54 | 379  | 5713  |
| >tr J9NUK8 J9NUK8_CANLF C-C motif chemokine OS=Canis lupus familiaris<br>OX=9615 GN=CCL22 PE=3 SV=1                                     | 0.95 | 0.95 | 68.30  | 180390.9 | 1 | 1 | 0 | 9.68 | 93   | 2965  |
| >tr E2RL57 E2RL57_CANLF Pre-mRNA-splicing factor SPF27<br>OS=Canis lupus familiaris OX=9615 GN=BCAS2 PE=3 SV=1                          | 0.14 | 0.14 | 79.30  | 178071.9 | 1 | 1 | 0 | 6.67 | 225  | 29223 |
| >tr E2RH09 E2RH09_CANLF Small RNA binding exonuclease protection factor<br>La OS=Canis lupus familiaris OX=9615 GN=SSB PE=4 SV=2        | 0.10 | 0.07 | 89.40  | 176993.6 | 1 | 1 | 0 | 1.97 | 406  | 21679 |
| >tr F1Q0P9 F1Q0P9_CANLF AT-hook containing transcription factor 1<br>OS=Canis lupus familiaris OX=9615 GN=AHCTF1 PE=4 SV=3              | 0.12 | 0.12 | 35.00  | 172283.4 | 1 | 1 | 0 | 0.39 | 2321 | 1521  |
| >tr J9P2E5 J9P2E5_CANLF PPFIA binding protein 1 OS=Canis lupus familiaris<br>OX=9615 GN=PPFIBP1 PE=3 SV=2                               | 0.35 | 0.35 | 50.60  | 169581.7 | 1 | 1 | 0 | 1.39 | 1005 | 1621  |
| >sp Q9XSR3 RBM47_CANLF RNA-binding protein 47 OS=Canis lupus<br>familiaris OX=9615 GN=RBM47 PE=2 SV=1                                   | 0.52 | 0.52 | 55.00  | 167701.5 | 1 | 1 | 0 | 1.52 | 592  | 166   |
| >tr J9P3E6 J9P3E6_CANLF Zinc finger protein 250 OS=Canis lupus familiaris<br>OX=9615 GN=ZNF250 PE=4 SV=2                                | 0.10 | 0.09 | 38.60  | 161137.5 | 1 | 1 | 1 | 2.87 | 557  | 9280  |
| >tr F1PZ92 F1PZ92_CANLF Purinergic receptor P2Y14<br>OS=Canis lupus familiaris OX=9615 GN=P2RY14 PE=4 SV=3                              | 0.22 | 0.22 | 49.30  | 144065.8 | 1 | 1 | 0 | 2.35 | 340  | 27948 |
| >tr F1P795 F1P795_CANLF RAS guanyl releasing protein 2<br>OS=Canis lupus familiaris OX=9615 GN=RASGRP2 PE=3 SV=2                        | 0.25 | 0.25 | 6.40   | 140693.8 | 1 | 1 | 0 | 1.32 | 606  | 41099 |
| >tr F1PAV7 F1PAV7_CANLF ATP/GTP binding protein like 2<br>OS=Canis lupus familiaris OX=9615 GN=AGBL2 PE=3 SV=3                          | 1.01 | 1.01 | 69.50  | 139042.3 | 1 | 1 | 0 | 0.93 | 863  | 6782  |
| >tr A0A5F4CTD7 A0A5F4CTD7_CANLF Acetyl-CoA carboxylase 1<br>OS=Canis lupus familiaris OX=9615 GN=ACACA PE=4 SV=1                        | 0.45 | 0.45 | 40.40  | 115326.9 | 1 | 1 | 1 | 0.67 | 2380 | 11170 |
