# Supplementary material for: Proteome Profiling of Canine Epididymal Fluid: In Search of Protein Markers of Epididymal Sperm Motility
Source: MDPI journal article supplement (doi:10.3390/ijms241914790), 2023-09-30

**Supplementary Figure S1.** Raw Western blot images showing changes in abundances of selected cauda epididymal fluid proteins of dogs (*Canis lupus familiaris*) divided into two groups according to epididymal sperm progressive motility: good sperm motility (GSM) and poor sperm motility (PSM). ALB—Albumin (**A**), PTGDS—Prostaglandin-H2 D-isomerase (**B**), CRISP2—Cysteine-rich secretory protein 2 (**C**), ACTB—Actin, cytoplasmic 1 (**D**).

**(A) ALB**

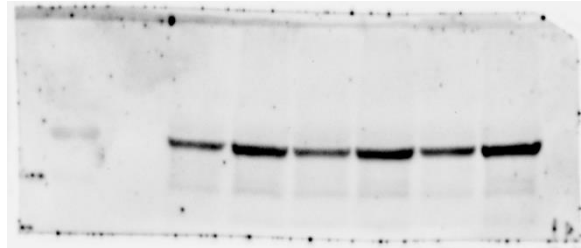

**(B) PTGDS**

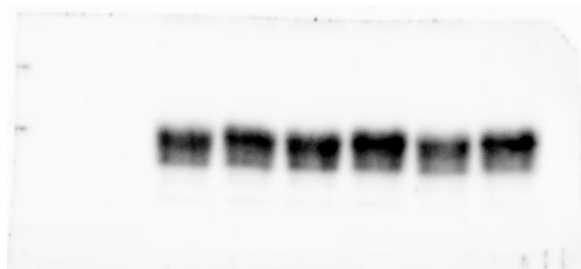

**(C) CRISP2**

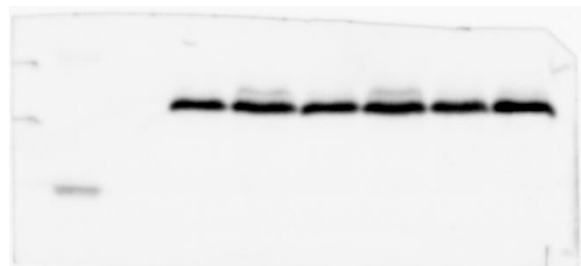

**(D) ACTB**

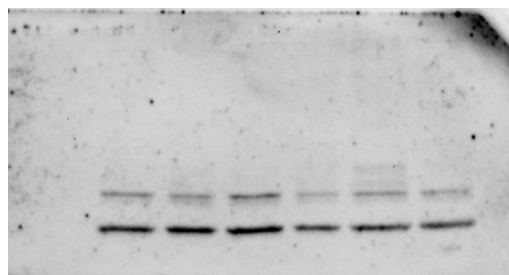

Supplement: s1 [file s1]
